# Supplementary material for: Zeolite-Containing Mixture Supplementation Ameliorated Dextran Sodium Sulfate-Induced Colitis in Mice by Suppressing the Inflammatory Bowel Disease Pathway and Improving Apoptosis in Colon Mucosa
Source: Nutrients. 2017 May 6;9(5):467. doi: 10.3390/nu9050467 (PMC5452197; doi:10.3390/nu9050467)
Supplement: Supplementary file 1 [file nutrients-09-00467-s001.xlsx]

## Sheet: Table S1 Primer sequence
Table S1. Oligonucleotide sequences used in the real-time PCR analysis
Gene Symbol	Full name		Oligonucleotide sequence
Il12b	interleukin 12b	F	GCGCAAGAAAGAAAAGATGAA
		R	TTGCATTGGACTTCGGTAGA
Il12rβ1	interleukin 12 receptor subunit beta 1	F	GAGCCCCTAAACTGCAACAG
		R	CATGAAGCACTTTCCCCTTC
Stat4	Signal transducer and activator of transcription 4	F	CCAACGACAATTGAAACTGC
		R	GATCTATGGTAAAGAACACTCTCCAGT
Ifng	Interferon gamma	F	ACTGCATCTTGGCTTTGCAG
		R	AGCTCATTGAATGCTTGGCG
Tlr4	Toll-like receptor 4	F	CAAACTGGAACATAGCCACCT
		R	AGGAGTTTCTGTGAGAGGGAAG
Tlr5	Toll-like receptor 5	F	AAAAGCAGGTGCCTTGAGAA
		R	AGTGCATTCTGGCTACAGCA
Tnfα	Tumor necrosis factor-alpha	F	GGCAGGTCTACTTTGGAGTCATTGC
		R	ACATTCGAGGCTCCAGTGAATTCGG
Il6	Interleukin 6	F	AACGATGATGCACTTGCAGA
		R	GAGCATTGGAAATTGGGGTA
Il1β	Interleukin 1 beta	F	TGGTGTGTGACGTTCCCATTAG
		R	GGTTGATATTCTGTCCATTGAGGTG
P53	Tumor protein p53	F	GCCATGGCCATCTACAAGAA
		R	CTCGGGTGGCTCATAAGGTA
Igfbp3	Insulin-like growth factor binding protein 3	F	ACTCTGGGAGCCCATAAGGA
		R	TGAAGAACTAAGCGCACCAA
Igf	Insulin-like growth factor 1	F	GGCATTGTGGATGAGTGTTG
		R	TGATGTGGCATTTTCTGCTC
Rplp1	Ribosomal protein, large, P1	F	ATCTACTCCGCCCTCATCCT
		R	CAGATGAGGCTCCCAATGTT

## Sheet: Table S2 Microarray
Table S2. Differentially expressed genes in colonic mucosa
2,300 Up-regulated genes in DHY8 compared to DSS
			Fold Change	Fold Change
Probe Set ID	Gene Title	Gene Symbol	DSS vs. CON	DHY8 vs. DSS
1435012_x_at	chymotrypsin-like elastase family, member 3B /// predicted gene 13011 /// chymotrypsin-like elastase family member 3B-like	Cela3b /// Gm13011 /// LOC100862548	0.0737157	5696.41
1415954_at	trypsin 4 /// trypsin 5	Try4 /// Try5	0.0818113	3144.74
1416055_at	amylase 2a1 /// amylase 2a2 /// amylase 2a3 /// amylase 2a4 /// amylase 2a5	Amy2a1 /// Amy2a2 /// Amy2a3 /// Amy2a4 /// Amy2a5	0.0744468	2822.83
1437326_x_at	chymotrypsin-like elastase family, member 3B /// chymotrypsin-like elastase family member 3B-like	Cela3b /// LOC100862548	0.533698	1910.7
1448281_a_at	chymotrypsin-like elastase family, member 2A	Cela2a	0.126008	1832.05
1448220_at	chymotrypsinogen B1	Ctrb1	0.12357	942.173
1435507_x_at	protease, serine, 2	Prss2	0.552366	670.531
1425152_s_at	serine (or cysteine) peptidase inhibitor, clade I, member 2	Serpini2	0.14308	90.6097
1454638_a_at	phenylalanine hydroxylase	Pah	0.115211	75.5687
1454623_at	carboxypeptidase A2, pancreatic	Cpa2	0.357065	49.289
1435611_x_at	chymotrypsin-like elastase family, member 3B	Cela3b	0.662993	46.6885
1441690_at	cadherin 8	Cdh8	0.0271009	35.3957
1452090_a_at	olfactomedin 3	Olfm3	0.0388684	34.1034
1441613_at	zinc finger protein 40	Zfp40	0.139412	32.0452
1459092_at	solute carrier organic anion transporter family, member 6c1	Slco6c1	0.564829	30.7742
1420350_at	late cornified envelope 1A2	Lce1a2	0.0342624	30.1435
1460258_at	leukocyte cell derived chemotaxin 1	Lect1	0.090106	28.1741
1427366_at	keratin associated protein 3-1	Krtap3-1	0.265173	27.0684
1442456_at	spermatogenesis associated 5	Spata5	0.022926	24.9176
1448821_at	tyrosinase	Tyr	0.0426839	24.3363
1445130_at	expressed sequence AA407111	AA407111	0.270678	23.779
1419769_at	CD22 antigen	Cd22	0.457195	21.9102
1453503_at	serine peptidase inhibitor, Kazal type 11	Spink12	0.0479991	21.4093
1442558_at	predicted gene 10421	Gm10421	0.134276	19.2546
1440504_at	coiled-coil domain containing 39	Ccdc39	0.26193	19.1742
1437880_at	SKI family transcriptional corepressor 1	Skor1	0.0700366	18.9819
1417688_at	family with sequence similarity 20, member C	Fam20c	0.0629852	18.9148
1420343_at	granzyme D	Gzmd	0.344561	18.7143
1457229_at	G-protein coupled receptor 173	Gpr173	0.0725662	18.1399
1438813_at	predicted gene, 19395	Gm19395	0.0536502	18.1145
1434324_x_at	eukaryotic translation initiation factor 3, subunit H	Eif3h	0.0725091	17.8402
1438617_at	serine (or cysteine) peptidase inhibitor, clade A (alpha-1 antiproteinase, antitrypsin), member 7	Serpina7	0.0428249	17.6408
1446119_at	predicted gene, 17733	Gm17733	0.101627	17.589
1445445_s_at	prostaglandin E receptor 1 (subtype EP1)	Ptger1	0.0443635	17.5604
1440798_x_at	leucine rich repeat containing 6 (testis)	Lrrc6	0.327376	17.4373
1444298_at	interaction protein for cytohesin exchange factors 1	Ipcef1	0.156375	17.4208
1420777_a_at	capping protein (actin filament) muscle Z-line, alpha 1 pseudogene	4933400A11Rik	0.526424	17.3244
1430843_at	glutamate decarboxylase-like 1	Gadl1	0.163273	16.8466
1423250_a_at	transforming growth factor, beta 2	Tgfb2	0.0439368	16.7862
1432333_a_at	spermatogenesis and centriole associated 1 like	Spatc1l	0.100638	16.668
1455225_at	spectrin repeat containing, nuclear envelope 1	Syne1	0.301678	16.4837
1438613_at	potassium voltage-gated channel, shaker-related subfamily, member 4	Kcna4	0.474417	16.4781
1446534_at	angiopoietin-like 2	Angptl2	0.189553	16.4064
1455025_at	progestin and adipoQ receptor family member IX	Paqr9	0.113035	16.3267
1420177_at	immunoglobulin lambda-like polypeptide 1	Igll1	0.361276	16.3036
1447551_x_at	latrophilin 3	Lphn3	0.066389	15.889
1421195_at	cholecystokinin A receptor	Cckar	0.0344731	15.8613
1450177_at	nerve growth factor receptor (TNFR superfamily, member 16)	Ngfr	0.161507	15.7832
1422831_at	fibrillin 2 /// fibrillin-2-like	Fbn2 /// LOC100047082	0.0839494	15.7226
1418548_at	seminal vesicle secretory protein 6	Svs6	0.0664872	15.5348
1455498_at	G-protein-coupled receptor 50	Gpr50	0.0853897	15.192
1450599_at	vomeronasal 1 receptor 53	Vmn1r53	0.310539	15.097
1437831_at	zinc finger, CCHC domain containing 4	Zcchc4	0.0294769	14.8845
1419634_a_at	growth hormone releasing hormone	Ghrh	0.117652	14.8276
1450554_at	defensin beta 2	Defb2	0.102901	14.8228
1419150_at	myogenic factor 6	Myf6	0.0983735	14.6073
1421169_at	zinc finger protein 46	Zfp46	0.531376	14.5999
1452027_a_at	transformation related protein 63	Trp63	0.0732878	14.3119
1422207_at	5-hydroxytryptamine (serotonin) receptor 5A	Htr5a	0.0541421	14.2531
1455813_at	predicted gene 13023	Gm13023	0.235339	14.1297
1439716_at	piwi-like RNA-mediated gene silencing 4	Piwil4	0.0482584	14.0229
1426020_at	thymopoietin	Tmpo	0.15887	13.942
1434163_at	KH domain containing 1B	Khdc1b	0.27415	13.8576
1453817_at	ATP-binding cassette, sub-family A (ABC1), member 6	Abca6	0.0725819	13.6908
1420757_at	myogenic factor 5	Myf5	0.115186	13.5065
1446255_at	KCNQ1 overlapping transcript 1	Kcnq1ot1	0.118921	13.4651
1444547_at	ankyrin repeat domain 40	Ankrd40	0.118728	13.4243
1419500_at	poly(A) binding protein, cytoplasmic 2	Pabpc2	0.269434	13.2565
1442808_at	thioredoxin-like 4A	Txnl4a	0.32285	13.212
1421644_at	schlafen 3	Slfn3	0.1468	13.0833
1431813_at	myosin XVIIIb	Myo18b	0.347812	13.071
1444362_at	neurogenic differentiation 2	Neurod2	0.206412	12.7913
1428430_at	RGM domain family, member B	Rgmb	0.0637947	12.711
1459326_at	DNA segment, Chr 9, ERATO Doi 256, expressed	D9Ertd256e	0.119274	12.6706
1455209_at	phosphoenolpyruvate carboxykinase 1, cytosolic	Pck1	0.0892115	12.6295
1448827_s_at	myosin, heavy polypeptide 6, cardiac muscle, alpha /// myosin, heavy polypeptide 7, cardiac muscle, beta	Myh6 /// Myh7	0.46686	12.2896
1437664_at	homeobox D3	Hoxd3	0.191724	12.2353
1422448_at	trefoil factor 2 (spasmolytic protein 1)	Tff2	0.467604	12.1671
1450614_x_at	interferon alpha 5	Ifna5	0.314505	12.1453
1456207_at	mature T cell proliferation 1	Mtcp1	0.0462371	11.9761
1442919_at	SH3 and PX domains 2B	Sh3pxd2b	0.109413	11.8865
1456351_at	bromodomain containing 8	Brd8	0.091821	11.7373
1452295_at	prostate transmembrane protein, androgen induced 1	Pmepa1	0.344357	11.7112
1444529_at	predicted pseudogene 2022 /// predicted gene 5662 /// predicted gene 8300	Gm2022 /// Gm5662 /// Gm8300	0.293682	11.6861
1416798_a_at	NME/NM23 nucleoside diphosphate kinase 4	Nme4	0.279496	11.6637
1424756_at	huntingtin interacting protein 1	Hip1	0.0932138	11.6274
1451691_at	endothelin receptor type A	Ednra	0.0770471	11.5517
1459831_s_at	transmembrane and coiled-coil domains 5	Tmco5	0.443794	11.4889
1443769_at	enamelin	Enam	0.450561	11.4594
1437312_at	bone morphogenetic protein receptor, type 1B	Bmpr1b	0.0630109	11.4554
1443277_at	N-deacetylase/N-sulfotransferase (heparan glucosaminyl) 3	Ndst3	0.406774	11.396
1424563_at	solute carrier family 25 (mitochondrial carrier, adenine nucleotide translocator), member 4	Slc25a4 ]	0.0288001	11.3955
1422936_at	MAS1 oncogene	Mas1	0.115517	11.3597
1439916_at	predicted gene 9861	Gm9861	0.0555097	11.3084
1428012_at	complement component 8, alpha polypeptide	C8a	0.160071	11.3024
1436713_s_at	maternally expressed 3	Meg3	0.0585657	11.2744
1427122_at	coatomer protein complex, subunit gamma 2, antisense 2	Copg2as2	0.0307303	11.2217
1433275_at	transmembrane protein 30C	Tmem30c	0.188768	11.1938
1442173_at	PHD finger protein 3	Phf3	0.281988	11.0869
1460300_a_at	leukocyte tyrosine kinase	Ltk	0.137337	11.0824
1432238_at	spermatogenesis associated, serine-rich 1	Spats1	0.189209	11.073
1426867_at	doublesex and mab-3 related transcription factor 2	Dmrt2	0.158847	11.0437
1427535_s_at	obscurin-like 1	Obsl1	0.110102	11.0322
1456442_at	RAB3A interacting protein (rabin3)-like 1	Rab3il1	0.079755	10.9842
1449105_at	SH2 domain protein 2A	Sh2d2a	0.0976642	10.9656
1438323_at	lens intrinsic membrane protein 2	Lim2	0.0858498	10.951
1453407_at	testis expressed 29	Tex29	0.0901712	10.8112
1428115_a_at	RAB2B, member RAS oncogene family	Rab2b	0.120921	10.7866
1420800_a_at	potassium voltage-gated channel, subfamily Q, member 2	Kcnq2	0.168678	10.7595
1425003_at	urocanase domain containing 1	Uroc1	0.152223	10.742
1447890_at	reticulocalbin 1	Rcn1	0.0524332	10.6988
1448296_x_at	tubulin, alpha 3A /// tubulin, alpha 3B	Tuba3a /// Tuba3b	0.229704	10.6844
1425864_a_at	VPS10 domain receptor protein SORCS 1	Sorcs1	0.102476	10.6758
1437147_at	gamma-aminobutyric acid (GABA) A receptor, subunit gamma 2	Gabrg2	0.260196	10.6594
1446777_at	secreted phosphoprotein 2	Spp2	0.420505	10.5712
1447041_at	NIPA-like domain containing 4	Nipal4	0.0969828	10.5328
1428591_at	patatin-like phospholipase domain containing 2	Pnpla2	0.100868	10.5253
1447230_at	WD repeat domain 92	Wdr92	0.115729	10.4867
1441655_at	predicted gene 884	Gm884	0.121362	10.4599
1436800_at	follistatin-like 5	Fstl5	0.164238	10.4132
1438286_at	OTU domain containing 7A	Otud7a	0.592266	10.3875
1454303_at	epsin 2	Epn2	0.0673238	10.3599
1420422_at	protocadherin beta 21	Pcdhb21	0.0608627	10.3477
1438217_at	RNA binding protein, fox-1 homolog (C. elegans) 1	Rbfox1	0.110232	10.3378
1432151_at	Obg-like ATPase 1	Ola1	0.0806192	10.3257
1443028_at	La ribonucleoprotein domain family, member 6	Larp6	0.159871	10.3102
1426185_at	calcium channel, voltage-dependent, alpha 2/delta subunit 2	Cacna2d2	0.488231	10.2551
1444996_at	DEP domain containing 5	Depdc5	0.052867	10.1378
1416275_at	solute carrier family 26, member 6	Slc26a6 ]	0.0580079	9.99819
1419895_at	expressed sequence AA536748	AA536748	0.0685372	9.97741
1444655_at	U1 small nuclear ribonucleoprotein C	Snrpc	0.128118	9.96247
1436464_at	predicted gene, 17566	Gm17566	0.174081	9.93657
1420348_at	LIM homeobox protein 5	Lhx5	0.128896	9.92747
1456905_at	UDP-Gal:betaGlcNAc beta 1,4- galactosyltransferase, polypeptide 2 /// coiled-coil domain containing 24	B4galt2 /// Ccdc24	0.543215	9.92706
1429986_at	G-protein coupled receptor 173	Gpr173	0.096996	9.89146
1450456_at	interleukin 21 receptor	Il21r	0.398741	9.8827
1451054_at	orosomucoid 1	Orm1	0.605857	9.86693
1449969_at	tropomodulin 4	Tmod4	0.130334	9.79797
1441561_at	F-box and leucine-rich repeat protein 3	Fbxl3	0.0560591	9.79194
1450580_at	G protein-coupled receptor 45	Gpr45	0.323435	9.76167
1448089_at	DNA segment, Chr 4, ERATO Doi 58, expressed	D4Ertd58e	0.0860997	9.71131
1421601_at	GS homeobox 2	Gsx2	0.173877	9.68734
1437935_at	meiosis-specific, MEI4 homolog (S. cerevisiae)	Mei4	0.0582656	9.6852
1438444_at	serine peptidase inhibitor, Kazal type 10	Spink10	0.125507	9.63292
1416242_at	kelch-like 13	Klhl13	0.0455285	9.60895
1421504_at	trans-acting transcription factor 4	Sp4	0.106675	9.59207
1435971_at	regulating synaptic membrane exocytosis 3	Rims3	0.0723542	9.55015
1439506_at	myelin regulatory factor	Myrf	0.649169	9.54185
1453871_at	solute carrier family 6 (neurotransmitter transporter, GABA), member 11	Slc6a11	0.127272	9.46996
1416063_x_at	carcinoembryonic antigen-related cell adhesion molecule 11	Ceacam11	0.377949	9.43573
1420147_at	expressed sequence AA407331	AA407331	0.395508	9.41099
1421794_at	killer cell lectin-like receptor subfamily C, member 3	Klrc3	0.140989	9.29606
1421417_s_at	elaC homolog 1 (E. coli)	Elac1	0.298904	9.25203
1449967_at	single-minded homolog 1 (Drosophila)	Sim1	0.0541275	9.21986
1456656_at	lin-7 homolog A (C. elegans)	Lin7a	0.137497	9.14859
1436442_at	protein tyrosine phosphatase, non-receptor type 14	Ptpn14	0.642057	9.14749
1433144_at	asparagine-linked glycosylation 2 (alpha-1,3-mannosyltransferase)	Alg2	0.57407	9.11135
1454884_at	zinc finger and BTB domain containing 46	Zbtb46	0.135002	9.10695
1450293_at	melanoma antigen, family B, 3	Mageb3	0.292601	9.10158
1420945_at	alpha thalassemia/mental retardation syndrome X-linked homolog (human)	Atrx	0.197474	9.06359
1429607_at	trafficking protein, kinesin binding 2	Trak2	0.164049	9.04437
1419137_at	SH3/ankyrin domain gene 3	Shank3	0.101755	9.03709
1437920_at	Eph receptor A5	Epha5	0.333699	9.028
1445841_at	leucine rich repeat containing 39	Lrrc39	0.152652	8.98635
1427682_a_at	early growth response 2	Egr2	0.134876	8.95508
1429465_at	SCP2 sterol-binding domain containing 1	Scp2d1	0.343324	8.95111
1450000_at	NLR family, pyrin domain containing 4C	Nlrp4c	0.615384	8.94526
1418221_at	casein alpha s2-like B	Csn1s2b	0.499332	8.92802
1430186_at	odontogenic, ameloblast asssociated	Odam	0.537749	8.92398
1438949_at	resistance to inhibitors of cholinesterase 8 homolog (C. elegans)	Ric8	0.211213	8.88859
1435684_at	ATP-binding cassette, sub-family C (CFTR/MRP), member 5	Abcc5	0.223788	8.86298
1449748_at	expressed sequence AA517023	AA517023	0.560696	8.81749
1436875_at	dynamin 3	Dnm3	0.105602	8.78522
1457042_at	EST AI256396	AI256396	0.580125	8.7816
1422683_at	interleukin-1 receptor-associated kinase 1 binding protein 1	Irak1bp1	0.20019	8.73394
1419017_at	corin	Corin	0.236272	8.73295
1439575_at	transmembrane protein 232	Tmem232	0.105892	8.7311
1420667_at	double C2, beta	Doc2b	0.529774	8.72418
1451707_s_at	solute carrier family 41, member 3	Slc41a3	0.503239	8.72417
1458232_at	dickkopf homolog 1 (Xenopus laevis)	Dkk1	0.0775282	8.70429
1440100_at	coiled-coil domain containing 130	Ccdc130	0.261184	8.67448
1430086_at	cholinergic receptor, nicotinic, alpha polypeptide 9	Chrna9	0.174105	8.64319
1432498_at	spermatogenesis associated 25	Spata25	0.10201	8.62533
1453608_at	centrosome and spindle pole associated protein 1	Cspp1	0.148163	8.62136
1458028_at	LYR motif containing 9	Lyrm9	0.122417	8.61094
1418158_at	transformation related protein 63	Trp63	0.13379	8.60256
1446958_at	DNA segment, Chr 13, ERATO Doi 150, expressed	D13Ertd150e	0.133658	8.56427
1457013_at	Ral GTPase activating protein, alpha subunit 1	Ralgapa1	0.1587	8.54023
1421095_a_at	transient receptor potential cation channel, subfamily C, member 1	Trpc1	0.0425365	8.53636
1448764_a_at	fatty acid binding protein 1, liver	Fabp1	0.253256	8.53112
1445924_at	predicted gene 13247 /// predicted gene, 21082	Gm13247 /// Gm21082	0.121251	8.47146
1451372_a_at	ADP-ribosyltransferase 1	Art1	0.146607	8.44635
1437574_at	a disintegrin-like and metallopeptidase (reprolysin type) with thrombospondin type 1 motif, 18	Adamts18	0.155829	8.43025
1455632_at	guanine nucleotide binding protein (G protein), beta 5	Gnb5	0.175439	8.27944
1455830_s_at	expressed sequence C87414 /// predicted gene 3259 /// predicted gene 6367 /// PRAME family member 9/15-like	C87414 /// Gm3259 /// Gm6367 /// LOC100041806	0.52096	8.27282
1429865_at	Fancd2 opposite strand	Fancd2os	0.615126	8.26226
1455318_at	T cell immunoglobulin and mucin domain containing 4	Timd4	0.0848031	8.26019
1457049_at	ATPase, H+ transporting, lysosomal V1 subunit E1	Atp6v1e1	0.171851	8.24333
1437408_at	G protein-coupled receptor 126	Gpr126	0.190757	8.24328
1456903_at	pentraxin related gene	Ptx3	0.546131	8.23574
1420963_at	hyaluronan and proteoglycan link protein 2	Hapln2	0.198763	8.22802
1435191_at	corneodesmosin	Cdsn	0.176778	8.20596
1448424_at	frizzled-related protein	Frzb	0.09942	8.17411
1450373_at	predicted gene 8882 /// uncharacterized LOC100502592 /// proline-rich protein BstNI subfamily 1 /// proline-rich protein MP5	Gm8882 /// LOC100502592 /// Prb1 /// Prpmp5	0.112906	8.16264
1443927_at	ubiquitin-like modifier activating enzyme 6	Uba6	0.28898	8.15425
1445846_at	gamma-aminobutyric acid (GABA) A receptor, subunit gamma 3	Gabrg3	0.099139	8.14263
1420453_at	crystallin, gamma S	Crygs	0.239982	8.11306
1440353_at	neurotrophin 5	Ntf5	0.0556666	8.10965
1433523_at	Ras association and DIL domains	Radil	0.232263	8.10529
1444083_at	titin	Ttn	0.203659	8.08496
1442937_at	expressed sequence C77190	C77190	0.140369	8.08276
1433133_at	EDAR (ectodysplasin-A receptor)-associated death domain	Edaradd	0.181968	8.05256
1453816_at	NSA2 ribosome biogenesis homolog (S. cerevisiae)	Nsa2	0.082143	8.03876
1441800_at	RAB GTPase activating protein 1	Rabgap1	0.503649	8.02554
1459934_at	ubiquitin specific peptidase 42	Usp42	0.414364	8.00858
1452412_at	homeobox C8	Hoxc8	0.225761	7.99737
1421463_at	sialic acid binding Ig-like lectin E	Siglece	0.267572	7.97672
1421490_at	proline-rich protein MP5	Prpmp5	0.0932993	7.97517
1424939_at	ankyrin repeat, SAM and basic leucine zipper domain containing 1	Asz1	0.246276	7.97509
1457306_at	aminolevulinate, delta-, dehydratase	Alad	0.182722	7.92954
1441018_at	ubiquitin specific peptidase 24	Usp24	0.171046	7.90077
1425714_a_at	Nfat activating molecule with ITAM motif 1	Nfam1	0.114688	7.89768
1416839_at	methylmalonyl-Coenzyme A mutase	Mut	0.130984	7.8942
1456557_at	coiled-coil domain containing 30	Ccdc30	0.163669	7.87463
1448074_at	relaxin 1	Rln1	0.133702	7.87402
1449285_at	cystatin 9	Cst9	0.100935	7.87223
1457310_x_at	scratch homolog 2, zinc finger protein (Drosophila)	Scrt2	0.0606136	7.84689
1459101_at	expressed sequence C78760	C78760	0.0711318	7.82519
1415786_at	progastricsin (pepsinogen C)	Pgc	0.075019	7.82212
1458682_at	ubinuclein 2	Ubn2	0.192509	7.81977
1449673_s_at	Tu translation elongation factor, mitochondrial	Tufm	0.208063	7.81636
1460365_a_at	dynamin 1	Dnm1	0.445813	7.81233
1438540_at	collagen, type XXV, alpha 1	Col25a1	0.0897286	7.80875
1445257_at	expressed sequence AU022531	AU022531	0.0569489	7.80418
1422114_at	Ets2 repressor factor	Erf	0.201787	7.78498
1454539_at	SEC13 homolog pseudogene	4933417G07Rik	0.161703	7.77856
1441104_at	myosin VB	Myo5b	0.10724	7.77129
1451010_at	nucleolar protein 11	Nol11	0.317073	7.76737
1449005_at	solute carrier family 16 (monocarboxylic acid transporters), member 3	Slc16a3	0.636543	7.73552
1419496_at	solute carrier organic anion transporter family, member 1a6	Slco1a6	0.658892	7.73315
1431463_at	coiled-coil domain containing 30	Ccdc30	0.0789663	7.71362
1433657_at	family with sequence similarity 78, member A	Fam78a	0.371409	7.69609
1456385_x_at	UBX domain protein 10	Ubxn10	0.109351	7.68533
1444708_at	transmembrane protein 29	Tmem29	0.647081	7.67845
1433892_at	sperm associated antigen 5	Spag5	0.121916	7.64599
1456788_at	mitochondrial ribosomal protein L54	Mrpl54	0.627673	7.63214
1435790_at	olfactomedin 2	Olfm2	0.197158	7.61674
1455923_at	potassium channel tetramerisation domain containing 8	Kctd8	0.417042	7.59633
1432460_at	polymorphic derived intron containing	Pldi	0.212681	7.59389
1453249_a_at	testis expressed gene 21	Tex21	0.155463	7.57018
1417729_at	myosin, heavy polypeptide 6, cardiac muscle, alpha	Myh6	0.0413215	7.56842
1436973_at	chaperonin containing Tcp1, subunit 8 (theta)	Cct8	0.211684	7.55656
1421378_s_at	ATP-binding cassette, sub-family C (CFTR/MRP), member 1	Abcc1	0.115679	7.51562
1458373_at	Gen homolog 1, endonuclease (Drosophila)	Gen1	0.301345	7.51368
1433760_a_at	rhomboid domain containing 3	Rhbdd3	0.201474	7.50361
1436182_at	special AT-rich sequence binding protein 1	Satb1	0.13034	7.49834
1447513_at	potassium voltage-gated channel, Shal-related family, member 3	Kcnd3	0.0644477	7.48141
1420690_at	fibroblast growth factor 10	Fgf10	0.261327	7.46743
1437931_at	toll-like receptor 12	Tlr12	0.235658	7.46736
1453831_at	transmembrane protein 138	Tmem138	0.515078	7.45705
1460693_a_at	collagen, type IX, alpha 3	Col9a3	0.0508075	7.45062
1443423_at	WNK lysine deficient protein kinase 2	Wnk2	0.146006	7.41214
1436485_s_at	whirlin	Whrn	0.0824324	7.37168
1448186_at	pancreatic lipase-related protein 2	Pnliprp2	0.401045	7.36525
1433405_at	dynamin binding protein	Dnmbp	0.214038	7.33355
1422220_at	POU domain, class 1, transcription factor 1	Pou1f1	0.519015	7.32268
1415805_at	colipase, pancreatic	Clps	0.273117	7.3225
1449313_at	kallikrein 1-related peptidase b5	Klk1b5	0.343801	7.32085
1427428_at	C-type lectin domain family 4, member g	Clec4g	0.173632	7.29736
1425877_at	hyaluronoglucosaminidase 3	Hyal3	0.146178	7.29522
1460107_at	family with sequence similarity 154, member B	Fam154b	0.0683339	7.26924
1419002_s_at	bile acid-Coenzyme A: amino acid N-acyltransferase	Baat	0.133884	7.25864
1450274_at	vomeronasal 2, receptor, pseudogene 54	Vmn2r-ps54	0.215181	7.25119
1435983_at	predicted gene 20621	Gm20621	0.625365	7.2396
1439318_at	microtubule associated serine/threonine kinase family member 4	Mast4	0.198976	7.18558
1443186_at	transmembrane protein 202	Tmem202	0.592251	7.17925
1455239_at	interferon induced transmembrane protein 10	Ifitm10	0.145739	7.15303
1422167_at	sema domain, seven thrombospondin repeats (type 1 and type 1-like), transmembrane domain (TM) and short cytoplasmic domain, (semaphorin) 5A	Sema5a	0.140471	7.12142
1425252_a_at	MAD1 mitotic arrest deficient 1-like 1	Mad1l1	0.233948	7.11631
1454293_at	retinoblastoma-like 1 (p107)	Rbl1	0.321406	7.10903
1431151_at	lipase, member O1 /// lipase, member O2 /// lipase, member O4 /// lipase member K-like	Lipo1 /// Lipo2 /// Lipo4 /// LOC101055671	0.123455	7.10403
1449193_at	CD5 antigen-like	Cd5l	0.360009	7.09046
1438632_x_at	transition protein 1	Tnp1	0.102782	7.07325
1421912_at	solute carrier family 23 (nucleobase transporters), member 1	Slc23a1 ]	0.11445	7.06629
1432754_at	cyclin C	Ccnc	0.0616335	7.06224
1458117_at	Ral GTPase activating protein, alpha subunit 1	Ralgapa1	0.221691	7.03682
1419626_at	a disintegrin and metallopeptidase domain 25 (testase 2)	Adam25	0.123126	7.03631
1458529_at	predicted gene 4793	Gm4793	0.07933	7.0246
1419010_x_at	kallikrein 1-related peptidase b5	Klk1b5	0.26081	7.01606
1420337_at	gastrulation brain homeobox 2	Gbx2	0.504489	7.00129
1437053_x_at	apoptosis inhibitor 5	Api5	0.665429	6.97496
1434464_at	aquaporin 12	Aqp12	0.16919	6.96767
1456934_at	calbindin 1	Calb1	0.306254	6.93247
1459250_at	teashirt zinc finger family member 2	Tshz2	0.225775	6.91903
1448024_at	natriuretic peptide receptor 3	Npr3	0.548566	6.91536
1421405_at	zinc finger, imprinted 1	Zim1	0.155216	6.91482
1420729_at	2-cell-stage, variable group, member 1	Tcstv1	0.510436	6.90956
1427841_at	keratin 14 /// keratin 17	Krt14 /// Krt17	0.167441	6.90052
1445639_at	androglobin	Adgb	0.147147	6.89001
1420577_at	activation-induced cytidine deaminase	Aicda	0.294177	6.87696
1447222_at	heat shock protein 12A	Hspa12a	0.506477	6.87385
1434024_at	nephronophthisis 4 (juvenile) homolog (human)	Nphp4	0.148451	6.8571
1442032_at	cDNA sequence BC030500	BC030500	0.158474	6.83816
1452962_at	transmembrane protein 25	Tmem25	0.199268	6.80891
1458056_at	splicing regulatory glutamine/lysine-rich protein 1	Srek1	0.222083	6.80814
1432019_at	TruB pseudouridine (psi) synthase homolog 1 (E. coli)	Trub1	0.184766	6.79618
1445036_at	DNA segment, Chr 11, ERATO Doi 518, expressed	D11Ertd518e	0.12377	6.79332
1452478_at	alpha-kinase 2	Alpk2	0.204034	6.78062
1433484_at	DNA segment, Chr 6, ERATO Doi 527, expressed	D6Ertd527e	0.134692	6.77796
1430572_at	proteasome (prosome, macropain) assembly chaperone 3	Psmg3	0.123995	6.76569
1425453_x_at	killer cell lectin-like receptor subfamily A, member 12	Klra12	0.10294	6.76007
1446561_at	paired box gene 8	Pax8	0.153246	6.72872
1451059_at	zinc finger protein 474	Zfp474	0.153401	6.70926
1420243_at	zinc finger E-box binding homeobox 1	Zeb1	0.0831476	6.69269
1436663_at	expressed sequence AI846148	AI846148	0.22154	6.692
1437178_at	predicted gene 7056	Gm7056	0.284266	6.68624
1422098_at	activin A receptor, type 1B	Acvr1b	0.418474	6.68576
1427044_a_at	amphiphysin	Amph	0.211802	6.66621
1417484_at	integrin binding sialoprotein	Ibsp	0.583276	6.64311
1425727_at	claudin 19	Cldn19	0.110866	6.63544
1422940_x_at	serine (or cysteine) peptidase inhibitor, clade B (ovalbumin), member 3B /// serine (or cysteine) peptidase inhibitor, clade B, member 3C	Serpinb3b /// Serpinb3c	0.50362	6.60337
1440829_x_at	tubulin tyrosine ligase-like family, member 11	Ttll11	0.147619	6.59222
1450179_at	sclerostin	Sost	0.660016	6.57712
1418917_at	heme binding protein 2	Hebp2	0.193384	6.57285
1456601_x_at	FXYD domain-containing ion transport regulator 2	Fxyd2	0.159638	6.57074
1431643_at	spermatogenesis associated glutamate (E)-rich protein 6, pseudogene 1	Speer6-ps1	0.0491721	6.55338
1449975_a_at	Parkinson disease (autosomal recessive, juvenile) 2, parkin	Park2	0.0821314	6.53143
1436227_at	left-right determination factor 2	Lefty2	0.181804	6.51442
1443193_at	tubulin tyrosine ligase-like 1	Ttll1	0.288024	6.50333
1444573_at	lemur tyrosine kinase 3	Lmtk3	0.599412	6.4887
1458654_at	ubiquitin protein ligase E3 component n-recognin 3	Ubr3	0.11508	6.48571
1427791_a_at	a disintegrin and metallopeptidase domain 1a	Adam1a	0.175211	6.48228
1420660_at	leucine rich repeat containing 6 (testis)	Lrrc6	0.173184	6.47544
1442769_at	myosin binding protein C, slow-type	Mybpc1	0.114737	6.45891
1450683_at	transgelin 3	Tagln3	0.401989	6.45449
1421100_a_at	disabled 1	Dab1	0.0156767	6.43071
1428135_a_at	eukaryotic translation elongation factor 1 delta (guanine nucleotide exchange protein)	Eef1d	0.185738	6.41368
1449588_at	ATP-binding cassette, sub-family A (ABC1), member 4	Abca4	0.386839	6.41132
1460280_at	GRB2-related adaptor protein 2	Grap2	0.182713	6.39498
1424560_at	proline-serine-threonine phosphatase-interacting protein 1	Pstpip1	0.277836	6.38046
1452243_at	potassium inwardly-rectifying channel, subfamily J, member 14	Kcnj14	0.580967	6.37207
1418785_at	mitogen-activated protein kinase 8 interacting protein 2	Mapk8ip2	0.130793	6.36171
1458411_at	kinase non-catalytic C-lobe domain (KIND) containing 1	Kndc1	0.239843	6.35853
1442101_at	leucine rich repeat and fibronectin type III, extracellular 1	Elfn1	0.563926	6.3531
1427029_at	HtrA serine peptidase 3	Htra3	0.346842	6.33356
1447992_s_at	proprotein convertase subtilisin/kexin type 2	Pcsk2	0.0983567	6.32531
1456549_at	predicted gene 550	Gm550	0.0802296	6.31
1435907_at	neurexin II	Nrxn2	0.147952	6.30617
1459940_at	ACN9 homolog (S. cerevisiae)	Acn9	0.439016	6.30591
1448738_at	calbindin 1	Calb1	0.142241	6.29729
1453992_at	zona pellucida binding protein	Zpbp	0.259459	6.27822
1440466_at	cDNA sequence BC003965	BC003965	0.218103	6.26922
1423932_at	CUGBP, Elav-like family member 1	Celf1	0.222398	6.25765
1431776_at	transducer of ERBB2, 2	Tob2	0.411577	6.24112
1422838_at	potassium channel, subfamily U, member 1	Kcnu1	0.158715	6.22243
1431659_at	transmembrane protein 86B	Tmem86b	0.166797	6.21245
1445318_at	kelch-like 4	Klhl4	0.43073	6.21204
1452572_at	calcium/calmodulin-dependent protein kinase IV	Camk4	0.344731	6.20629
1428238_at	akirin 2	Akirin2	0.177673	6.20427
1422267_at	forkhead box B2	Foxb2	0.118521	6.17412
1459164_at	expressed sequence AU014678	AU014678	0.210025	6.16532
1437400_at	neural precursor cell expressed, developmentally down-regulated gene 4-like	Nedd4l	0.208531	6.12288
1449431_at	transient receptor potential cation channel, subfamily C, member 6	Trpc6	0.217586	6.12253
1457655_x_at	Rho GTPase activating protein 27	Arhgap27	0.186806	6.10438
1443723_at	transient receptor potential cation channel, subfamily M, member 3	Trpm3	0.38061	6.10052
1459821_x_at	jumonji C domain-containing histone demethylase 1 homolog D (S. cerevisiae)	Jhdm1d	0.24439	6.10035
1457666_s_at	interferon activated gene 202B /// interferon-activable protein 202-like	Ifi202b /// LOC100044068	0.176731	6.09002
1416741_at	collagen, type V, alpha 1	Col5a1	0.578894	6.08113
1449916_at	pre B cell leukemia homeobox 4	Pbx4	0.0407285	6.07926
1458161_at	KCNQ1 overlapping transcript 1	Kcnq1ot1	0.183677	6.07413
1422187_at	gamma-aminobutyric acid (GABA) A receptor, subunit gamma 3	Gabrg3	0.448957	6.06874
1425301_at	neural cell adhesion molecule 2	Ncam2	0.469264	6.02362
1440911_at	collagen, type XXIII, alpha 1	Col23a1	0.388402	6.00095
1437086_at	achaete-scute complex homolog 1 (Drosophila)	Ascl1	0.173655	5.99473
1436491_at	X-linked lymphocyte-regulated 5 pseudogene	Gm11346	0.436846	5.99214
1418868_at	engrailed 2	En2	0.142013	5.98759
1439252_at	inner centromere protein	Incenp	0.562184	5.98546
1446940_at	TNF receptor-associated factor 6	Traf6	0.187377	5.96629
1453666_at	ring finger protein 32	Rnf32	0.224713	5.95413
1441476_at	suppressor of cytokine signaling 2	Socs2	0.161175	5.94978
1444666_at	ribosome production factor 2 homolog (S. cerevisiae)	Rpf2	0.627603	5.92889
1446226_at	Fanconi anemia, complementation group B	Fancb	0.304474	5.92285
1443974_at	phospholipase C-like 1	Plcl1	0.151181	5.91804
1451910_a_at	CD6 antigen	Cd6	0.621465	5.90845
1458919_at	muskelin 1, intracellular mediator containing kelch motifs	Mkln1	0.168634	5.90807
1459994_x_at	transferrin receptor 2	Tfr2	0.654737	5.90555
1457079_at	zinc finger protein 934	Zfp934	0.11305	5.90358
1455301_at	WAS/WASL interacting protein family, member 3	Wipf3	0.271774	5.90243
1423125_at	doublecortin-like kinase 1	Dclk1	0.0801445	5.8872
1438612_a_at	colipase, pancreatic	Clps	0.365855	5.87198
1454382_at	sterile alpha motif domain containing 4	Samd4	0.137067	5.86058
1421584_at	opsin 4 (melanopsin)	Opn4	0.354343	5.83733
1441615_at	core-binding factor, runt domain, alpha subunit 2, translocated to, 2 (human)	Cbfa2t2	0.108276	5.83439
1426470_at	TATA box binding protein	Tbp	0.102005	5.83073
1427264_at	crystallin, gamma B	Crygb	0.121841	5.82655
1438013_x_at	DEAH (Asp-Glu-Ala-His) box polypeptide 32	Dhx32	0.140611	5.82538
1432481_a_at	lysozyme-like 6	Lyzl6	0.398884	5.80835
1442716_at	tRNA methyltransferase 10C	Trmt10c	0.179156	5.80058
1426616_at	TLC domain containing 1	Tlcd1	0.0779179	5.79933
1451837_at	adaptor-related protein complex 3, beta 2 subunit	Ap3b2	0.100479	5.7969
1434902_at	ring finger protein 157	Rnf157	0.226164	5.79636
1418855_at	late cornified envelope 1L	Lce1l	0.475481	5.78958
1416825_at	syntrophin, acidic 1	Snta1	0.118135	5.78751
1451308_at	elongation of very long chain fatty acids (FEN1/Elo2, SUR4/Elo3, yeast)-like 4	Elovl4	0.153971	5.78629
1460437_at	cytohesin 4	Cyth4	0.104058	5.78386
1438918_at	farnesyl diphosphate farnesyl transferase 1	Fdft1	0.216555	5.78361
1455691_at	cytochrome P450, family 21, subfamily a, polypeptide 1	Cyp21a1	0.585527	5.77697
1457391_at	vesicle-associated membrane protein 3	Vamp3	0.107268	5.769
1453904_at	coiled-coil domain containing 146	Ccdc146	0.157769	5.76774
1455147_at	transmembrane protein 200C	Tmem200c	0.0911597	5.75904
1455367_at	dead end homolog 1 (zebrafish)	Dnd1	0.304707	5.75896
1418738_at	sodium channel, voltage-gated, type I, beta	Scn1b	0.466073	5.75188
1431785_at	ribonuclease T2A	Rnaset2a	0.256385	5.75105
1419566_at	fibronectin type 3 and ankyrin repeat domains 1	Fank1	0.165027	5.74971
1420363_at	BCL2-interacting killer	Bik	0.586022	5.74659
1451966_at	melanocortin 2 receptor accessory protein	Mrap	0.468289	5.74223
1446117_at	spire homolog 1 (Drosophila)	Spire1	0.207023	5.73651
1436486_x_at	whirlin	Whrn	0.23575	5.72954
1418759_at	protein tyrosine phosphatase, non-receptor type 20	Ptpn20	0.121565	5.71744
1430649_at	brain and acute leukemia, cytoplasmic	Baalc	0.170851	5.71437
1447406_at	Luc7 homolog (S. cerevisiae)-like	Luc7l	0.125228	5.69057
1456361_at	actin filament associated protein 1	Afap1	0.612085	5.66469
1423830_a_at	mesoderm induction early response 1, family member 2	Mier2	0.25047	5.66396
1428203_at	gamma-aminobutyric acid (GABA) A receptor, subunit beta 2	Gabrb2	0.165178	5.65434
1438801_at	dynamin 3	Dnm3	0.0483578	5.65235
1451427_a_at	EGF-like domain 7	Egfl7	0.176011	5.6491
1416311_s_at	tubulin, alpha 3A /// tubulin, alpha 3B	Tuba3a /// Tuba3b	0.387689	5.63888
1420833_at	vesicle-associated membrane protein 2	Vamp2	0.298212	5.63681
1422386_at	olfactory receptor 64	Olfr64	0.57389	5.62945
1429210_at	collagen, type XXIII, alpha 1	Col23a1	0.648324	5.62166
1449358_at	meiosis 1 associated protein	M1ap	0.102993	5.60965
1443556_at	transmembrane protein 140	Tmem140	0.184946	5.59893
1422353_at	POU domain, class 4, transcription factor 3	Pou4f3	0.0843582	5.58268
1448017_at	ubiquitin associated protein 2-like	Ubap2l	0.165502	5.5787
1452010_at	cholinergic receptor, nicotinic, alpha polypeptide 3	Chrna3	0.245269	5.57822
1432286_at	polymerase (DNA-directed), epsilon 4 (p12 subunit)	Pole4	0.227432	5.57524
1453986_at	ligase III, DNA, ATP-dependent	Lig3	0.570574	5.56998
1449895_at	acrosin prepropeptide	Acr	0.506503	5.56374
1436787_x_at	SEC14-like 3 (S. cerevisiae)	Sec14l3	0.251133	5.56302
1436682_at	thymosin, beta 10	Tmsb10	0.335614	5.5508
1458326_at	polymerase (RNA) II (DNA directed) polypeptide E	Polr2e	0.0620812	5.54029
1447292_at	ARP1 actin-related protein 1B, centractin beta	Actr1b	0.45483	5.54007
1439873_at	diacylglycerol kinase, delta	Dgkd	0.1746	5.53312
1455512_at	shisa homolog 6 (Xenopus laevis)	Shisa6	0.0806595	5.53029
1422295_at	MDS1 and EVI1 complex locus	Mecom	0.157947	5.52881
1457708_at	methyl-CpG binding domain protein 4	Mbd4	0.107053	5.52847
1435747_at	fibroblast growth factor 14	Fgf14	0.202706	5.51901
1418754_at	adenylate cyclase 8	Adcy8	0.209567	5.51854
1440144_x_at	Sfi1 homolog, spindle assembly associated (yeast)	Sfi1	0.361681	5.51819
1443646_at	immunoglobulin superfamily, member 10	Igsf10	0.338049	5.51779
1440852_at	isopentenyl-diphosphate delta isomerase 2	Idi2	0.171441	5.5125
1458955_at	eukaryotic translation elongation factor 1 gamma /// elongation factor 1-gamma-like	Eef1g /// LOC101055956	0.37192	5.50557
1422696_at	tweety homolog 1 (Drosophila)	Ttyh1	0.225605	5.50191
1421831_at	adenylate kinase 4	Ak4	0.20123	5.48497
1431047_at	chromodomain helicase DNA binding protein 6	Chd6	0.389174	5.48057
1446127_at	zinc finger E-box binding homeobox 1	Zeb1	0.0952218	5.47922
1424897_at	G protein-coupled receptor 85	Gpr85	0.115228	5.45823
1456725_x_at	ezrin	Ezr	0.154025	5.44805
1441659_at	D4, zinc and double PHD fingers, family 3	Dpf3	0.268451	5.44451
1459524_at	mutated in colorectal cancers	Mcc	0.312142	5.43622
1427656_at	T cell receptor beta, joining region	Tcrb-J	0.113183	5.4304
1448386_a_at	whey acidic protein	Wap	0.0804698	5.4242
1442577_at	adaptor-related protein complex 5, zeta 1 subunit	Ap5z1	0.214735	5.41729
1456829_at	paraneoplastic antigen MA3	Pnma3	0.123383	5.41076
1459594_at	listerin E3 ubiquitin protein ligase 1	Ltn1	0.196071	5.4015
1418476_at	cytokine receptor-like factor 1	Crlf1	0.112172	5.39869
1459075_at	expressed sequence AU022479	AU022479	0.282871	5.39645
1420590_at	hyaluronan synthase1	Has1	0.244086	5.39195
1447517_at	superkiller viralicidic activity 2-like 2 (S. cerevisiae)	Skiv2l2	0.211365	5.3895
1424007_at	growth differentiation factor 10	Gdf10	0.106382	5.38498
1457694_at	enolase 4	Eno4	0.296529	5.38145
1450120_at	sodium channel, voltage-gated, type I, alpha	Scn1a	0.282209	5.34458
1441657_at	uncharacterized LOC101056168	LOC101056168	0.184211	5.3349
1447559_at	G protein-coupled receptor 25	Gpr25	0.504064	5.33375
1436781_at	mannosidase 2, alpha B1	Man2b1	0.36571	5.32014
1422923_at	fibroblast growth factor 3	Fgf3	0.122459	5.31797
1428017_at	Pbx/knotted 1 homeobox 2	Pknox2	0.344239	5.30424
1458074_at	predicted gene 10037 /// zinc finger protein 58-like	Gm10037 /// LOC101056512	0.582218	5.28807
1433423_at	nuclear receptor subfamily 4, group A, member 2	Nr4a2	0.443872	5.28104
1420799_at	neurotensin receptor 1	Ntsr1	0.140231	5.28085
1459480_at	DNA segment, Chr 6, ERATO Doi 90, expressed	D6Ertd90e	0.119708	5.27696
1444122_at	synaptonemal complex protein 2	Sycp2	0.128382	5.2718
1445313_at	coenzyme Q9 homolog (yeast)	Coq9	0.177362	5.26443
1418849_x_at	aquaporin 7	Aqp7	0.123656	5.26022
1416040_at	lipase, gastric	Lipf ]	0.362325	5.2602
1419416_a_at	retinoic acid receptor, gamma	Rarg	0.194411	5.26002
1433526_at	kelch-like 8	Klhl8	0.172665	5.23671
1430376_at	leucine rich repeat containing 9	Lrrc9	0.0250015	5.21804
1438374_x_at	amyloid beta (A4) precursor protein	App	0.238417	5.20544
1451625_a_at	complement component 8, gamma polypeptide	C8g	0.136979	5.19785
1443333_at	predicted gene, 20383	Gm20383	0.115292	5.19487
1458300_at	aldo-keto reductase family 7, member A5 (aflatoxin aldehyde reductase)	Akr7a5	0.193162	5.18031
1431748_a_at	ring finger and FYVE like domain containing protein	Rffl	0.0655814	5.17371
1423253_at	myelin protein zero	Mpz	0.495282	5.17334
1438308_at	ATP/GTP binding protein-like 4	Agbl4	0.129557	5.17127
1427782_a_at	corticotropin releasing hormone receptor 1	Crhr1	0.199115	5.17093
1425386_at	osteoclast stimulatory transmembrane protein	Ocstamp	0.376548	5.16013
1420652_at	arginyltransferase 1	Ate1	0.468185	5.15408
1459396_at	transmembrane protein 241	Tmem241	0.336028	5.15278
1436109_at	expressed sequence AI317395	AI317395	0.222315	5.14582
1441451_at	bromodomain and WD repeat domain containing 3	Brwd3	0.0611339	5.14401
1448257_at	solute carrier family 29 (nucleoside transporters), member 2	Slc29a2	0.220903	5.14067
1426191_a_at	BCL2-like 1	Bcl2l1	0.0907031	5.11322
1439677_at	epilepsy, progressive myoclonic epilepsy, type 2 gene alpha	Epm2a	0.543569	5.10904
1436408_at	reprimo-like	Rprml	0.15313	5.1033
1419379_x_at	FXYD domain-containing ion transport regulator 2	Fxyd2	0.358357	5.10067
1440054_at	phosphatidylinositol 3-kinase, catalytic, alpha polypeptide	Pik3ca	0.438604	5.08962
1426505_at	Evi2a-Evi2b readthrough /// ecotropic viral integration site 2b	Evi2a-evi2b /// Evi2b	0.172675	5.08524
1447630_x_at	guanine nucleotide binding protein (G protein), beta 5	Gnb5	0.224803	5.08396
1440828_x_at	PHD finger protein 7	Phf7	0.174943	5.08055
1421766_at	ubiquitin carboxyl-terminal esterase L4	Uchl4	0.17174	5.07474
1430434_at	transketolase-like 2	Tktl2	0.272797	5.04271
1441711_at	predicted gene 12575	Gm12575	0.499903	5.04138
1442382_at	microtubule associated serine/threonine kinase family member 4	Mast4	0.135425	5.03677
1416887_at	C1D nuclear receptor co-repressor	C1d	0.147106	5.02861
1458267_at	zinc finger protein 248	Zfp248	0.233562	5.01013
1429869_at	WD repeat domain 65	Wdr65	0.277628	4.98691
1436212_at	transmembrane protein 71	Tmem71	0.0976523	4.98029
1443229_at	ATPase family, AAA domain containing 2	Atad2	0.136601	4.9776
1431690_at	potassium voltage-gated channel, subfamily H (eag-related), member 3	Kcnh3	0.0229558	4.97068
1427842_at	keratin associated protein 6-3	Krtap6-3	0.163663	4.97049
1419210_at	histamine receptor H1	Hrh1	0.45878	4.96177
1438142_s_at	cadherin-related family member 4	Cdhr4	0.531224	4.95799
1439746_at	dual specificity phosphatase 27 (putative)	Dusp27	0.251784	4.9567
1438128_at	predicted gene 12500	Gm12500	0.162018	4.95038
1444064_at	SAM domain and HD domain, 1	Samhd1	0.227213	4.94212
1439739_at	protease, serine, 50	Prss50	0.110244	4.93867
1439288_at	PNMA-like 1	Pnmal1	0.26293	4.9356
1453614_a_at	nuclear factor, erythroid derived 2, like 3	Nfe2l3	0.0882516	4.90954
1431926_a_at	family with sequence similarity 134, member C	Fam134c	0.603606	4.90435
1429102_at	arrestin domain containing 5	Arrdc5	0.141434	4.88978
1459173_at	protein tyrosine phosphatase, receptor type, D	Ptprd	0.284753	4.88489
1416266_at	prodynorphin	Pdyn	0.176536	4.86582
1430281_at	GLI pathogenesis-related 1 like 1	Glipr1l1	0.298798	4.86544
1449239_at	ring finger protein 138, retrogene 1	Rnf138rt1	0.089305	4.86454
1448511_at	protein tyrosine phosphatase, receptor type, C polypeptide-associated protein	Ptprcap	0.200093	4.86368
1419435_at	aldehyde oxidase 1	Aox1	0.312862	4.85622
1429346_a_at	centrosomal protein 72	Cep72	0.147974	4.85552
1445115_at	thrombospondin, type I, domain containing 7B	Thsd7b	0.437388	4.84885
1451623_at	mitochondrial ribosomal protein L15	Mrpl15	0.180368	4.84833
1438314_at	cyclin-dependent kinase 16	Cdk16	0.292099	4.84729
1458792_at	DNA segment, Chr 12, ERATO Doi 208, expressed	D12Ertd208e	0.0315433	4.8288
1455257_at	integrin beta 3	Itgb3	0.0657149	4.82394
1453246_at	RAB39B, member RAS oncogene family	Rab39b	0.326663	4.82285
1437438_x_at	pancreatic lipase-related protein 2	Pnliprp2	0.578826	4.81806
1431382_a_at	CAP-GLY domain containing linker protein family, member 4	Clip4	0.232638	4.80834
1444715_at	ArfGAP with SH3 domain, ankyrin repeat and PH domain 3	Asap3	0.290791	4.80695
1432598_at	germ cell-less homolog 1 (Drosophila)	Gmcl1	0.536946	4.80378
1447076_at	NEL-like 1	Nell1	0.111338	4.79499
1436140_at	DENN/MADD domain containing 6B	Dennd6b	0.1572	4.78598
1456334_s_at	zinc finger protein 783	Zfp783	0.213848	4.78358
1452296_at	slit homolog 3 (Drosophila)	Slit3	0.109468	4.78054
1445109_at	WD repeat domain 4	Wdr4	0.42687	4.77979
1421272_at	vav 2 oncogene	Vav2	0.444814	4.76995
1428295_at	synaptopodin 2-like	Synpo2l	0.171322	4.7654
1419969_at	expressed sequence C77370	C77370	0.597833	4.74987
1445266_at	excision repair cross-complementing rodent repair deficiency, complementation group 1	Ercc1	0.227283	4.74316
1427774_at	defensin beta 7	Defb7	0.0439977	4.7429
1430517_at	testis expressed 38	Tex38	0.563884	4.73858
1427723_at	growth differentiation factor 11	Gdf11	0.324383	4.72979
1450991_at	DnaJ (Hsp40) homolog, subfamily B, member 7	Dnajb7	0.43917	4.72942
1440632_at	protocadherin beta 4	Pcdhb4	0.116287	4.72461
1457352_x_at	SV2 related protein homolog (rat)-like	Svopl	0.345416	4.70892
1429823_at	sarcoglycan, gamma (dystrophin-associated glycoprotein)	Sgcg	0.464636	4.70763
1430591_at	dopa decarboxylase	Ddc	0.443354	4.70221
1443163_at	solute carrier family 39 (zinc transporter), member 2	Slc39a2	0.662864	4.69101
1446169_at	DiGeorge syndrome critical region gene 8	Dgcr8	0.426237	4.6823
1425738_at	immunoglobulin kappa chain complex	Igk	0.447247	4.68007
1432141_x_at	gasdermin A2	Gsdma2	0.142096	4.67011
1440848_at	KAT8 regulatory NSL complex subunit 1-like	Kansl1l	0.148579	4.6662
1450535_at	keratin associated protein 12-1	Krtap12-1	0.140694	4.66281
1450837_at	proline rich protein 2	Prp2	0.122589	4.65536
1451955_a_at	calcium channel, voltage-dependent, alpha 2/delta subunit 2	Cacna2d2	0.194185	4.64609
1447731_at	paternally expressed 3	Peg3	0.296398	4.63528
1436465_at	kelch-like 1	Klhl1	0.288768	4.63458
1428108_x_at	transmembrane and coiled-coil domains 2	Tmcc2	0.233249	4.63141
1427336_at	aldehyde dehydrogenase 8 family, member A1	Aldh8a1	0.606677	4.62775
1457561_at	integrin alpha 5 (fibronectin receptor alpha)	Itga5	0.566872	4.62754
1453537_a_at	WD repeat domain 17	Wdr17	0.181346	4.62151
1421189_at	gamma-aminobutyric acid (GABA) A receptor, subunit beta 3	Gabrb3	0.341993	4.62025
1424256_at	retinol dehydrogenase 12	Rdh12	0.322465	4.6084
1435499_at	leucine zipper-EF-hand containing transmembrane protein 2	Letm2	0.107	4.60578
1423761_at	methyltransferase like 13	Mettl13	0.491981	4.59077
1425033_at	solute carrier family 17 (sodium phosphate), member 2	Slc17a2	0.389887	4.59062
1447212_at	CCR4-NOT transcription complex, subunit 2	Cnot2	0.255172	4.58786
1421190_at	gamma-aminobutyric acid (GABA) A receptor, subunit beta 3	Gabrb3	0.111415	4.58647
1440857_at	carbamoyl-phosphate synthetase 2, aspartate transcarbamylase, and dihydroorotase	Cad	0.119027	4.57339
1442904_at	carbohydrate sulfotransferase 2	Chst2	0.15073	4.57197
1455890_x_at	predicted gene 5802	Gm5802	0.35959	4.56352
1457840_at	plexin A4	Plxna4	0.318075	4.55919
1447548_at	abhydrolase domain containing 5	Abhd5	0.268766	4.55733
1445470_at	collagen, type VI, alpha 4	Col6a4	0.624296	4.55214
1456954_at	potassium voltage-gated channel, shaker-related, subfamily, member 6	Kcna6	0.155279	4.54658
1429483_at	calcium binding and coiled-coil domain 2 /// calcium-binding and coiled-coil domain-containing protein 2-like	Calcoco2 /// LOC100505237	0.1086	4.54619
1421341_at	axin2	Axin2	0.100976	4.54563
1446685_at	collagen, type VI, alpha 5	Col6a5	0.180303	4.53202
1452643_at	grainyhead-like 2 (Drosophila)	Grhl2	0.241706	4.52523
1452014_a_at	insulin-like growth factor 1	Igf1	0.487416	4.50637
1422610_s_at	insulin-like growth factor 2 mRNA binding protein 3	Igf2bp3	0.582878	4.50039
1453231_at	cyclin-dependent kinase-like 1 (CDC2-related kinase)	Cdkl1	0.0923427	4.49933
1457324_at	predicted gene 17167	Gm17167	0.0783785	4.49495
1422745_at	bicaudal D homolog 2 (Drosophila)	Bicd2	0.458845	4.48969
1445523_at	gap junction protein, gamma 3	Gjc3	0.182049	4.4876
1425111_at	sortilin-related VPS10 domain containing receptor 3	Sorcs3	0.215214	4.4845
1430893_at	major urinary protein 10	Mup10	0.429821	4.48136
1421092_at	serine (or cysteine) peptidase inhibitor, clade A (alpha-1 antiproteinase, antitrypsin), member 12	Serpina12	0.58048	4.47602
1430282_at	transmembrane protein 242	Tmem242	0.522263	4.47193
1443767_at	protein-L-isoaspartate (D-aspartate) O-methyltransferase domain containing 1	Pcmtd1	0.330651	4.47034
1449231_at	zinc finger protein 296	Zfp296	0.131214	4.46867
1450049_a_at	histone cell cycle regulation defective homolog A (S. cerevisiae)	Hira	0.182108	4.46593
1416218_x_at	ribosomal protein L37a	Rpl37a	0.262861	4.46198
1450527_at	somatostatin receptor 1	Sstr1	0.405682	4.4575
1431243_at	TBC1 domain containing kinase	Tbck	0.117295	4.45293
1457984_at	corticotropin releasing hormone	Crh	0.120757	4.44597
1420199_at	solute carrier family 35, member A4	Slc35a4 ]	0.0578302	4.44399
1436829_at	tripartite motif-containing 67	Trim67	0.344181	4.44246
1440505_at	phosphatidylinositol-specific phospholipase C, X domain containing 1	Plcxd1	0.18148	4.42867
1419430_at	cytochrome P450, family 26, subfamily a, polypeptide 1	Cyp26a1	0.45971	4.42852
1422034_a_at	paralemmin	Palm	0.210727	4.42424
1453305_at	IQ motif containing D	Iqcd	0.136586	4.42382
1428954_at	solute carrier family 9 (sodium/hydrogen exchanger), member 3 regulator 2	Slc9a3r2	0.251906	4.41581
1418626_a_at	clusterin	Clu	0.529897	4.41545
1439437_x_at	carboxypeptidase E	Cpe	0.38121	4.41165
1425285_a_at	RAB27A, member RAS oncogene family	Rab27a	0.266102	4.39841
1441925_at	solute carrier family 15, member 4	Slc15a4	0.542563	4.38924
1423268_at	integrin alpha 5 (fibronectin receptor alpha)	Itga5	0.219854	4.38829
1439944_at	RNA binding motif protein 46	Rbm46	0.123274	4.38711
1426282_at	neurotrimin	Ntm	0.219324	4.38655
1431357_a_at	retinitis pigmentosa GTPase regulator interacting protein 1	Rpgrip1	0.362534	4.36623
1444336_at	potassium inwardly-rectifying channel, subfamily J, member 3	Kcnj3	0.236803	4.36013
1439019_at	Fraser syndrome 1 homolog (human)	Fras1	0.18223	4.36009
1442210_at	prospero homeobox 2	Prox2	0.282761	4.35713
1423578_at	collagen, type XI, alpha 2	Col11a2	0.21968	4.35309
1422274_at	gap junction protein, alpha 8	Gja8	0.203151	4.34449
1430962_at	ubiquitin-conjugating enzyme E2S	Ube2s	0.0341904	4.33718
1425218_a_at	secretoglobin, family 3A, member 2	Scgb3a2	0.268928	4.3362
1418873_at	sideroflexin 4	Sfxn4	0.102522	4.33564
1447712_x_at	E1A binding protein p400	Ep400	0.362891	4.33541
1454618_at	expressed sequence C86187	C86187	0.42524	4.32506
1429380_at	regulator of G-protein signaling 12	Rgs12	0.164205	4.32063
1451737_at	phosphatidylinositol 3-kinase, regulatory subunit, polypeptide 1 (p85 alpha)	Pik3r1	0.332189	4.31478
1456690_at	ubiquitin specific peptidase 44	Usp44	0.103779	4.31085
1444625_at	predicted gene 15408	Gm15408	0.176787	4.30031
1422725_at	male germ cell-associated kinase	Mak	0.309024	4.29881
1431862_x_at	outer dense fiber of sperm tails 2-like	Odf2l	0.125559	4.29723
1419329_at	sorbin and SH3 domain containing 3	Sorbs3	0.304309	4.28722
1439313_at	latrophilin 3	Lphn3	0.540658	4.28647
1445047_at	expressed sequence C79246	C79246	0.200473	4.28317
1438509_at	proteaseome (prosome, macropain) 28 subunit, 3	Psme3	0.11046	4.28222
1444871_at	expressed sequence AU022697	AU022697	0.559742	4.2726
1451616_at	pregnancy specific glycoprotein pseudogene 1	Psg-ps1	0.21443	4.27043
1459575_at	DNA segment, Chr 1, ERATO Doi 704, expressed	D1Ertd704e	0.188627	4.26871
1443540_at	mitogen-activated protein kinase kinase kinase 1	Map3k1	0.621162	4.26749
1458480_at	topoisomerase (DNA) II binding protein 1	Topbp1	0.13492	4.26192
1430912_a_at	tectorin beta	Tectb	0.219	4.25286
1459738_x_at	galactosidase, alpha	Gla	0.587734	4.25074
1428456_at	bolA-like 1 (E. coli)	Bola1	0.608579	4.24873
1453219_a_at	tudor domain containing 12	Tdrd12	0.586732	4.24386
1418690_at	protein tyrosine phosphatase, receptor type Z, polypeptide 1	Ptprz1	0.155349	4.23721
1424890_at	basonuclin 1	Bnc1	0.226058	4.23552
1457045_at	UDP-N-acetyl-alpha-D-galactosamine:polypeptide N-acetylgalactosaminyltransferase 13	Galnt13	0.113582	4.22052
1430153_at	tropomodulin 2	Tmod2	0.152319	4.21647
1417748_x_at	forkhead box M1	Foxm1	0.417902	4.21507
1455629_at	dopamine receptor D1A	Drd1a	0.130587	4.21468
1435839_at	predicted gene 7694	Gm7694	0.328213	4.21314
1419339_at	neuraminidase 3	Neu3	0.238629	4.20978
1442099_at	ubiquitin specific peptidase 31	Usp31	0.293886	4.20732
1420653_at	transforming growth factor, beta 1	Tgfb1	0.192032	4.19606
1443352_at	EST C77614	C77614	0.122443	4.1958
1456304_at	predicted gene 996	Gm996	0.234691	4.18727
1443599_at	predicted gene 10702	Gm10702	0.151606	4.16959
1430773_a_at	t-complex-associated testis expressed 2	Tcte2	0.511888	4.16064
1438939_x_at	necdin	Ndn	0.474974	4.14844
1424233_at	mesenchyme homeobox 2	Meox2	0.128834	4.14508
1418757_at	tripartite motif-containing 69	Trim69	0.200067	4.14383
1447579_at	reticulon 4 interacting protein 1	Rtn4ip1	0.360528	4.14113
1429567_at	Ras association (RalGDS/AF-6) domain family (N-terminal) member 10	Rassf10	0.274603	4.14023
1458251_at	expressed sequence AU022166	AU022166	0.650889	4.13787
1450079_at	Nik related kinase	Nrk	0.142941	4.13598
1427709_at	glutamate receptor, ionotropic, kainate 3	Grik3	0.559392	4.13047
1446734_at	expressed sequence C77438	C77438	0.313093	4.12847
1446274_at	solute carrier family 16 (monocarboxylic acid transporters), member 1	Slc16a1	0.285915	4.12556
1452736_at	R3H domain and coiled-coil containing 1	R3hcc1	0.139879	4.11794
1425355_at	acyl-CoA synthetase family member 2	Acsf2	0.646636	4.11777
1447346_s_at	dual specificity phosphatase 8	Dusp8	0.177606	4.11511
1458012_at	dachshund 2 (Drosophila)	Dach2	0.295934	4.10893
1424433_at	methionine sulfoxide reductase B2	Msrb2	0.230522	4.10804
1425360_at	myeloid/lymphoid or mixed-lineage leukemia (trithorax homolog, Drosophila); translocated to, 6	Mllt6	0.249133	4.10283
1443428_at	DNA segment, Chr 8, ERATO Doi 67, expressed	D8Ertd67e	0.42969	4.0914
1451827_a_at	NADPH oxidase 4	Nox4	0.10808	4.09013
1427146_at	carnosine synthase 1	Carns1	0.206312	4.08542
1451484_a_at	synapsin I	Syn1	0.247075	4.08473
1415994_at	cytochrome P450, family 2, subfamily e, polypeptide 1	Cyp2e1 ]	0.374733	4.08019
1439753_x_at	sine oculis-related homeobox 4	Six4	0.106	4.07371
1457037_at	zinc finger and BTB domain containing 2	Zbtb2	0.343835	4.07338
1454008_at	protein arginine N-methyltransferase 3	Prmt3	0.259044	4.0658
1421439_at	wingless related MMTV integration site 8b	Wnt8b	0.152866	4.06567
1436625_at	Fc receptor, IgG, high affinity I	Fcgr1	0.434521	4.05531
1431119_at	DnaJ (Hsp40) related, subfamily B, member 13	Dnajb13	0.369176	4.04925
1451831_at	oxysterol binding protein-like 6	Osbpl6	0.584585	4.04804
1427614_at	prolactin induced protein	Pip	0.288536	4.03606
1445817_at	expressed sequence BB168181	BB168181	0.212656	4.03557
1443080_at	adenylate cyclase 5	Adcy5	0.41769	4.03091
1457361_at	zinc finger protein 804A	Zfp804a	0.246404	4.02322
1452541_at	erythrocyte protein band 4.1-like 2	Epb4.1l2	0.364346	4.02135
1453148_at	sema domain, immunoglobulin domain (Ig), short basic domain, secreted, (semaphorin) 3D	Sema3d	0.118519	4.00672
1447620_at	biogenesis of organelles complex-1, subunit 4, cappuccino	Bloc1s4	0.193538	4.00671
1431935_at	lipoic acid synthetase	Lias	0.124444	4.00512
1430491_at	block of proliferation 1	Bop1	0.560842	4.00161
1457773_at	SLAM family member 6	Slamf6	0.333623	3.99879
1457429_s_at	somatomedin B and thrombospondin, type 1 domain containing	Sbspon	0.0423026	3.98682
1443997_at	G protein regulated inducer of neurite outgrowth 2	Gprin2	0.0904257	3.9857
1415999_at	hairy/enhancer-of-split related with YRPW motif 1	Hey1	0.532573	3.97946
1421079_at	nuclear receptor subfamily 4, group A, member 3	Nr4a3	0.512693	3.97463
1458450_at	zinc finger RNA binding protein	Zfr	0.395055	3.96626
1455811_at	eukaryotic translation initiation factor 3, subunit L	Eif3l	0.32361	3.96149
1438717_a_at	oxysterol binding protein-like 6	Osbpl6	0.122771	3.95524
1424675_at	solute carrier family 39 (metal ion transporter), member 6	Slc39a6	0.319123	3.95524
1440419_at	leucine rich colipase-like 1	Lrcol1	0.382155	3.94671
1437652_at	sema domain, transmembrane domain (TM), and cytoplasmic domain, (semaphorin) 6C	Sema6c	0.272147	3.94539
1460477_at	family with sequence similarity 135, member B	Fam135b	0.231716	3.94339
1438584_at	spermatogenesis associated 31 subfamily D, member 1D	Spata31d1d	0.280693	3.93687
1453027_at	discs, large (Drosophila) homolog-associated protein 1	Dlgap1	0.191565	3.93387
1440815_x_at	predicted gene 8267	Gm8267	0.0401307	3.93304
1420950_at	zinc and ring finger 1	Znrf1	0.211469	3.93284
1434652_at	CDC42 binding protein kinase beta	Cdc42bpb	0.247366	3.92234
1440598_at	syntrophin, gamma 1	Sntg1	0.146602	3.92222
1457921_at	family with sequence similarity 3, member A	Fam3a	0.11142	3.91828
1443915_at	mitochondrial ribosomal protein L47	Mrpl47	0.192365	3.91761
1424576_s_at	cytochrome P450, family 2, subfamily c, polypeptide 44	Cyp2c44	0.342006	3.9137
1420066_s_at	CD160 antigen	Cd160	0.362966	3.9113
1458615_at	DEP domain containing 5	Depdc5	0.240002	3.91047
1417051_at	protocadherin 8	Pcdh8	0.466993	3.90749
1437138_at	forkhead box M1	Foxm1	0.0879789	3.90651
1453802_at	LIM and calponin homology domains 1	Limch1	0.12828	3.89746
1446995_at	cytochrome P450, family 7, subfamily b, polypeptide 1	Cyp7b1	0.117702	3.89246
1423146_at	hairy and enhancer of split 5 (Drosophila)	Hes5	0.245818	3.89121
1446708_at	hypoxia inducible factor 3, alpha subunit	Hif3a	0.258065	3.89075
1438730_at	neuron navigator 1	Nav1	0.109146	3.88144
1431045_at	family with sequence similarity 49, member A	Fam49a	0.176209	3.88025
1437790_at	echinoderm microtubule associated protein like 5	Eml5	0.267092	3.87125
1447084_at	nuclear factor of activated T cells, cytoplasmic, calcineurin dependent 1	Nfatc1	0.308906	3.85864
1420793_at	major urinary protein 4	Mup4	0.177381	3.85756
1454624_at	DENN/MADD domain containing 2A	Dennd2a	0.28846	3.85702
1438455_at	poly(A) binding protein, cytoplasmic 4-like	Pabpc4l	0.0735258	3.84626
1418043_at	ATP-binding cassette, sub-family C (CFTR/MRP), member 5	Abcc5	0.239927	3.83639
1456612_at	interleukin 17D	Il17d	0.16836	3.83216
1426751_s_at	nucleoporin 107	Nup107	0.193583	3.82248
1450316_at	protocadherin beta 13	Pcdhb13	0.492077	3.82236
1420055_at	solute carrier family 35, member C2	Slc35c2]	0.496614	3.81847
1448594_at	WNT1 inducible signaling pathway protein 1	Wisp1	0.0775881	3.81642
1444168_at	xenotropic and polytropic retrovirus receptor 1	Xpr1	0.159313	3.81338
1425454_a_at	interleukin 12a	Il12a	0.402933	3.80929
1430463_a_at	synuclein, alpha interacting protein (synphilin)	Sncaip	0.285607	3.80055
1448091_at	DNA segment, Chr 15, ERATO Doi 50, expressed	D15Ertd50e	0.248437	3.79548
1457648_x_at	family with sequence similarity 20, member C	Fam20c	0.469664	3.79223
1419145_at	smoothelin-like 1	Smtnl1	0.169189	3.79121
1427215_at	acyl-CoA synthetase medium-chain family member 2	Acsm2	0.25702	3.78926
1417455_at	transforming growth factor, beta 3	Tgfb3	0.232894	3.78314
1445383_at	transmembrane protein 44	Tmem44	0.605544	3.78309
1421224_a_at	HNF1 homeobox B	Hnf1b	0.233845	3.78102
1439394_x_at	cell division cycle 20	Cdc20	0.352102	3.7553
1436720_s_at	oogenesin 3	Oog3	0.611673	3.75408
1425851_a_at	adhesion molecule with Ig like domain 1	Amigo1	0.61336	3.75205
1432235_at	epithelial stromal interaction 1 (breast)	Epsti1	0.225026	3.74736
1415886_at	SH2 domain containing 3C	Sh2d3c	0.139337	3.74045
1439048_at	cell adhesion molecule 2	Cadm2	0.163034	3.73874
1430993_at	ubiquitin associated protein 2-like	Ubap2l	0.159303	3.73436
1443957_at	DIX domain containing 1	Dixdc1	0.247307	3.72446
1432406_at	carboxylesterase 5A	Ces5a	0.16362	3.71515
1419891_s_at	expressed sequence C77545	C77545	0.168312	3.70482
1420771_at	small proline-rich protein 2D	Sprr2d	0.27878	3.69948
1443903_at	protein phosphatase 1A, magnesium dependent, alpha isoform	Ppm1a	0.491606	3.69484
1441922_x_at	vacuolar protein sorting 11 (yeast)	Vps11	0.189617	3.69249
1452515_a_at	xylosyltransferase II	Xylt2	0.207165	3.691
1457372_at	expressed sequence AW121686	AW121686	0.0619793	3.68326
1420570_x_at	protein TCL1B3-like /// T cell leukemia/lymphoma 1B, 3	LOC100041483 /// Tcl1b3	0.510487	3.68293
1430087_at	NTPase, KAP family P-loop domain containing 1	Nkpd1	0.365904	3.6815
1453378_at	IKAROS family zinc finger 3	Ikzf3	0.267281	3.6766
1455136_at	ATPase, Na+/K+ transporting, alpha 2 polypeptide	Atp1a2	0.571164	3.6696
1419892_at	coiled-coil domain containing 167	Ccdc167	0.218345	3.66662
1454467_at	predicted gene 14025	Gm14025	0.388687	3.6652
1445140_at	expressed sequence AU022804	AU022804	0.163762	3.66508
1438586_at	T-box 22	Tbx22	0.25518	3.66286
1453843_at	THAP domain containing 6	Thap6	0.487603	3.66277
1432103_a_at	SH3-domain GRB2-like 3	Sh3gl3	0.0951978	3.65391
1450764_at	acyloxyacyl hydrolase	Aoah	0.494913	3.65202
1425574_at	Eph receptor A3	Epha3	0.336566	3.65101
1422410_at	Fer3-like (Drosophila)	Ferd3l	0.387381	3.65079
1420506_a_at	syntaxin binding protein 1	Stxbp1	0.469233	3.64715
1443989_at	tripartite motif-containing 9	Trim9	0.515268	3.64526
1453217_at	predicted gene 14590 /// predicted gene 14594 /// predicted gene 14595 /// predicted gene 14596 /// predicted gene 14598 /// predicted gene 14625 /// predicted gene 16404 /// predicted gene 16405 /// predicted gene 16430 /// predicted gene 6660 /// predicted gene 6664 /// predicted gene 7958 /// Slx-like 1	Gm14590 /// Gm14594 /// Gm14595 /// Gm14596 /// Gm14598 /// Gm14625 /// Gm16404 /// Gm16405 /// Gm16430 /// Gm6660 /// Gm6664 /// Gm7958 /// Slxl1	0.124941	3.63532
1436468_at	zinc finger, DHHC domain containing 8	Zdhhc8	0.134642	3.63161
1455178_at	small G protein signaling modulator 2	Sgsm2	0.21095	3.62985
1424361_at	TELO2 interacting protein 2	Tti2	0.416618	3.61697
1453150_at	proteasome (prosome, macropain) subunit, beta type, 11	Psmb11	0.251446	3.61633
1438806_at	B cell CLL/lymphoma 9-like	Bcl9l	0.138461	3.60956
1422129_at	adenomatosis polyposis coli 2	Apc2	0.227734	3.6054
1445440_at	coiled coil domain containing 88A	Ccdc88a	0.504836	3.60147
1454104_a_at	solute carrier family 16 (monocarboxylic acid transporters), member 9	Slc16a9	0.423046	3.59995
1449361_at	T-box 21	Tbx21	0.319978	3.59293
1432726_at	proteasome (prosome, macropain) 26S subunit, non-ATPase, 11	Psmd11	0.103006	3.58878
1422526_at	acyl-CoA synthetase long-chain family member 1	Acsl1	0.417085	3.57938
1453131_at	CD300 antigen like family member G	Cd300lg	0.432497	3.5775
1445223_at	platelet endothelial aggregation receptor 1	Pear1	0.0691829	3.57422
1437998_at	adaptor-related protein complex 1, sigma 2 subunit	Ap1s2	0.495621	3.57159
1427216_at	interferon zeta	Ifnz	0.255486	3.56663
1422973_a_at	thyroid hormone responsive	Thrsp	0.340683	3.56474
1423526_at	AT rich interactive domain 3B (BRIGHT-like)	Arid3b	0.307367	3.56193
1420805_at	myosin, light chain 10, regulatory	Myl10	0.313682	3.56001
1438513_at	TatD DNase domain containing 1	Tatdn1	0.308897	3.55925
1459815_at	zinc finger, MYND domain containing 12	Zmynd12	0.236353	3.55789
1460076_x_at	zinc finger protein 3	Zfp3	0.22629	3.54976
1444166_at	thyroid hormone responsive	Thrsp	0.384756	3.54193
1439800_at	CAP-GLY domain containing linker protein 1	Clip1	0.167621	3.53768
1419237_at	ubiquitin specific peptidase 29	Usp29	0.281404	3.53734
1422331_at	POU domain, class 3, transcription factor 3	Pou3f3	0.105553	3.53734
1422118_at	syncoilin	Sync	0.289518	3.53089
1422419_s_at	transition protein 2	Tnp2	0.359164	3.53061
1453811_at	heat shock protein 9	Hspa9	0.379583	3.52637
1432261_at	carboxylesterase 1H	Ces1h	0.202081	3.52423
1438766_at	proline-rich nuclear receptor coactivator 2	Pnrc2	0.264186	3.5201
1420571_at	prolactin family 6, subfamily a, member 1	Prl6a1	0.237252	3.5186
1418977_at	SAP30-binding protein-like /// SAP30 binding protein	LOC639905 /// Sap30bp	0.153698	3.51731
1451454_at	protocadherin 20	Pcdh20	0.205816	3.51229
1443499_at	predicted gene, 20556	Gm20556	0.571743	3.51065
1457482_at	lysine (K)-specific demethylase 5B	Kdm5b	0.401726	3.51013
1460368_at	membrane protein, palmitoylated 4 (MAGUK p55 subfamily member 4)	Mpp4	0.158064	3.50993
1434947_at	kinesin family member 3C	Kif3c	0.449545	3.5081
1451810_at	Map3k7 C-terminal like	Map3k7cl	0.200377	3.5003
1427263_at	inactive X specific transcripts	Xist	0.24872	3.49899
1430437_a_at	VPS9 domain containing 1	Vps9d1	0.231002	3.49683
1457722_at	killer cell lectin-like receptor subfamily B member 1F	Klrb1f	0.664185	3.49525
1446631_at	predicted gene 14047	Gm14047	0.425814	3.49223
1422125_at	5-hydroxytryptamine (serotonin) receptor 2B	Htr2b	0.103047	3.48987
1446400_at	olfactory receptor 558	Olfr558	0.260357	3.48685
1458163_at	zinc finger protein 941	Zfp941	0.380918	3.48558
1441981_at	transmembrane protease, serine 11f	Tmprss11f	0.0305629	3.48094
1447489_at	transmembrane protein 214	Tmem214	0.378303	3.48089
1436536_at	exocyst complex component 3-like	Exoc3l	0.265841	3.47871
1421086_at	period circadian clock 3	Per3	0.473733	3.47543
1420807_a_at	delta-like 2 homolog (Drosophila)	Dlk2	0.610534	3.47364
1422146_at	sema domain, seven thrombospondin repeats (type 1 and type 1-like), transmembrane domain (TM) and short cytoplasmic domain, (semaphorin) 5B	Sema5b	0.246011	3.46455
1443256_at	predicted gene 16233	Gm16233	0.329014	3.45838
1449959_x_at	late cornified envelope 1H	Lce1h	0.269099	3.45731
1429333_at	kinesin family member 2B	Kif2b	0.244937	3.45357
1438273_at	predicted gene 13718	Gm13718	0.217101	3.45282
1419096_at	apolipoprotein M	Apom	0.305168	3.45075
1422398_at	histone cluster 1, H1e	Hist1h1e	0.441197	3.44449
1439661_at	solute carrier family 16 (monocarboxylic acid transporters), member 14	Slc16a14	0.166443	3.43874
1441961_at	microtubule-associated protein 9	Map9	0.338629	3.43806
1423443_at	solute carrier family 4 (anion exchanger), member 8	Slc4a8	0.180416	3.43606
1448055_at	fibronectin type III domain containing 7	Fndc7	0.323018	3.43214
1456463_at	IgLON family member 5	Iglon5	0.181898	3.43009
1432033_at	netrin G2	Ntng2	0.643625	3.42935
1438203_at	scavenger receptor class F, member 2	Scarf2	0.380311	3.42825
1432486_a_at	protease, serine, 40	Prss40	0.255183	3.42012
1443044_at	uncharacterized A830091E24	A830091E24	0.182433	3.41657
1421685_at	C-type lectin domain family 4, member b1	Clec4b1	0.459597	3.41231
1455782_at	sterile alpha motif domain containing 7	Samd7	0.632462	3.41109
1457427_at	adherens junction associated protein 1	Ajap1	0.0987509	3.39817
1421278_s_at	spectrin alpha, erythrocytic 1	Spta1	0.0930651	3.39791
1420193_at	keratin 17	Krt17	0.186486	3.39305
1442962_at	expressed sequence AU022052	AU022052	0.285607	3.39245
1416196_at	40S ribosomal protein SA-like /// 40S ribosomal protein SA-like /// ribosomal protein SA	LOC100505031 /// LOC636901 /// Rpsa	0.285921	3.3923
1424664_at	family with sequence similarity 222, member B	Fam222b	0.208813	3.38577
1429794_a_at	purinergic receptor P2X, ligand-gated ion channel, 1	P2rx1	0.561056	3.38049
1441846_x_at	transmembrane emp24 domain containing 3	Tmed3	0.211873	3.37955
1438240_at	calicin	Ccin	0.363918	3.37403
1453116_at	zinc finger protein 689	Zfp689	0.64967	3.37345
1421790_a_at	potassium voltage-gated channel, shaker-related subfamily, beta member 3	Kcnab3	0.417036	3.36848
1439356_at	flightless I homolog (Drosophila) /// protein flightless-1 homolog	Flii /// LOC101056523	0.192361	3.36665
1417464_at	troponin C2, fast	Tnnc2	0.124033	3.35454
1420575_at	metallothionein 3	Mt3	0.175719	3.34958
1454130_at	predicted gene 3120	Gm3120	0.224897	3.34783
1416444_at	elongation of very long chain fatty acids (FEN1/Elo2, SUR4/Elo3, yeast)-like 2	Elovl2	0.199523	3.34673
1431945_at	ADP-ribosylation factor-like 13A	Arl13a	0.325577	3.34136
1417787_at	dickkopf-like 1	Dkkl1	0.110964	3.33901
1429023_at	hepatocyte cell adhesion molecule	Hepacam	0.435393	3.33875
1457353_at	translocase of outer mitochondrial membrane 70 homolog A (yeast)	Tomm70a	0.308381	3.33331
1456208_at	glycerol-3-phosphate acyltransferase 2, mitochondrial	Gpat2	0.0806755	3.33312
1441365_at	forkhead box P2	Foxp2	0.128563	3.3191
1455264_at	family with sequence similarity 132, member A	Fam132a	0.386175	3.31662
1419740_at	phosphodiesterase 6B, cGMP, rod receptor, beta polypeptide	Pde6b	0.23721	3.31532
1417765_a_at	amylase 1, salivary	Amy1	0.545653	3.31485
1418683_at	lin-7 homolog B (C. elegans)	Lin7b	0.0852556	3.30674
1440075_at	protein inhibitor of activated STAT 4	Pias4	0.270373	3.30058
1449508_at	interleukin 27 receptor, alpha	Il27ra	0.567633	3.29983
1450118_a_at	troponin T3, skeletal, fast	Tnnt3	0.244228	3.29775
1441762_at	predicted gene, 19576	Gm19576	0.524	3.29259
1422840_at	ubiquitin-conjugating enzyme E2D 2B	Ube2d2b	0.0509194	3.29252
1425957_x_at	thymus, brain and testes associated	Tbata	0.218234	3.2889
1435062_at	serine/arginine repetitive matrix 4	Srrm4	0.194171	3.28705
1436643_x_at	hepcidin antimicrobial peptide 2	Hamp2	0.164539	3.28328
1458053_at	abl-interactor 2	Abi2	0.401855	3.28183
1427023_at	phytanoyl-CoA hydroxylase interacting protein-like	Phyhipl	0.165531	3.2812
1429592_at	lipoma HMGIC fusion partner-like 3	Lhfpl3	0.123207	3.27883
1455223_at	insulin-like growth factor 2 mRNA binding protein 1	Igf2bp1	0.172213	3.27567
1416575_at	cell division cycle 45	Cdc45	0.264168	3.266
1447214_at	cholinergic receptor, nicotinic, alpha polypeptide 9	Chrna9	0.169579	3.26085
1447330_at	zinc finger and BTB domain containing 32	Zbtb32	0.214819	3.26085
1436268_at	dendrin	Ddn	0.128113	3.25932
1421507_at	olfactory receptor 78	Olfr78	0.326334	3.2581
1460440_at	latrophilin 3	Lphn3	0.23101	3.25699
1456937_at	cadherin-like 26	Cdh26	0.256682	3.25694
1440986_at	RNA polymerase II associated protein 1	Rpap1	0.448943	3.25403
1422348_at	h-2 class I histocompatibility antigen, L-D alpha chain-like	LOC676708	0.306004	3.25361
1451923_at	raftlin family member 2	Rftn2	0.114448	3.25029
1449536_at	potassium intermediate/small conductance calcium-activated channel, subfamily N, member 1	Kcnn1	0.207223	3.23366
1424340_at	leucine rich repeat containing 48	Lrrc48	0.263166	3.23021
1450164_at	achaete-scute complex homolog 1 (Drosophila)	Ascl1	0.364476	3.22688
1420047_at	MAF1 homolog (S. cerevisiae)	Maf1	0.264291	3.2268
1426175_a_at	tryptase alpha/beta 1	Tpsab1	0.437967	3.22597
1431323_at	leucine zipper transcription factor-like 1	Lztfl1	0.194753	3.22052
1439795_at	G protein-coupled receptor 64	Gpr64	0.363166	3.21978
1431825_at	serine/arginine-rich protein specific kinase 3	Srpk3	0.156713	3.21856
1422058_at	nodal	Nodal	0.304371	3.21354
1452564_at	oncofetal antigen	Ofa	0.476987	3.20902
1428039_at	WD repeat domain 20A	Wdr20a	0.589705	3.20238
1436285_at	coiled-coil domain containing 113	Ccdc113	0.0378637	3.20191
1437609_at	ubiquitin-conjugating enzyme E2U (putative)	Ube2u	0.100409	3.20116
1438616_x_at	seminal vesicle secretory protein 5	Svs5	0.351347	3.19878
1420064_s_at	transketolase-like 1	Tktl1	0.250725	3.19837
1453639_s_at	coiled-coil domain containing 163	Ccdc163	0.127777	3.19437
1436324_at	START domain containing 9	Stard9	0.311689	3.19335
1432629_at	predicted gene 9939	Gm9939	0.141808	3.19271
1419968_at	expressed sequence C77370	C77370	0.208129	3.18708
1441905_x_at	small nuclear ribonucleoprotein N /// SNRPN upstream reading frame	Snrpn /// Snurf	0.667623	3.1862
1445504_at	nucleolar and coiled-body phosphoprotein 1 pseudogene	Gm5124	0.134484	3.18368
1449777_at	dihydrouridine synthase 4-like (S. cerevisiae)	Dus4l	0.658939	3.18367
1454726_s_at	protein tyrosine phosphatase domain containing 1	Ptpdc1	0.250559	3.18222
1457761_at	expressed sequence C79607	C79607	0.304417	3.17375
1456342_at	paired box gene 6	Pax6	0.489762	3.1727
1457858_at	THO complex 4 pseudogene	Gm4850	0.436399	3.17081
1433054_at	integrin beta 2-like	Itgb2l	0.409878	3.17019
1421220_at	ankyrin repeat domain 17	Ankrd17	0.137419	3.16757
1425571_at	signaling lymphocytic activation molecule family member 1	Slamf1	0.326146	3.16502
1427871_at	platelet-activating factor receptor	Ptafr	0.132902	3.16119
1436490_x_at	GTP-binding nuclear protein Ran-like /// RAN, member RAS oncogene family	LOC100045999 /// Ran	0.320169	3.16076
1439004_at	ribosomal protein S6 kinase, polypeptide 5	Rps6ka5	0.312075	3.15996
1435388_at	NADPH dependent diflavin oxidoreductase 1	Ndor1	0.584378	3.15929
1449924_at	proteoglycan 3	Prg3	0.271896	3.15719
1457651_x_at	rad and gem related GTP binding protein 2	Rem2	0.237188	3.15703
1425132_at	neuropilin (NRP) and tolloid (TLL)-like 1	Neto1	0.281507	3.15377
1453273_at	potassium channel, subfamily V, member 1	Kcnv1	0.301153	3.14918
1437855_at	microtubule-associated protein 4	Map4	0.0745633	3.14906
1449956_at	protein kinase C, epsilon	Prkce	0.371128	3.14375
1444386_at	phosphodiesterase 1C	Pde1c	0.130576	3.14267
1450486_a_at	opioid receptor-like 1	Oprl1	0.441791	3.14203
1453466_at	ribosomal protein S6	Rps6	0.175217	3.14001
1444972_at	expressed sequence C77626	C77626	0.461621	3.12607
1448745_s_at	loricrin	Lor	0.0863574	3.12588
1434321_at	ATR interacting protein	Atrip	0.437593	3.12536
1459867_x_at	unc-45 homolog A (C. elegans)	Unc45a	0.375368	3.12157
1450267_at	toll-like receptor 8	Tlr8	0.528738	3.12035
1419521_at	zinc finger protein 94	Zfp94	0.178969	3.12016
1437695_at	prokineticin receptor 2	Prokr2	0.370776	3.11385
1451549_at	cyclic nucleotide gated channel beta 1	Cngb1	0.297889	3.11381
1446881_at	expressed sequence AU022749	AU022749	0.176341	3.11296
1430757_at	prune homolog 2 (Drosophila)	Prune2	0.232391	3.1127
1450673_at	collagen, type IX, alpha 2	Col9a2	0.206296	3.10811
1420960_at	Fanconi anemia, complementation group G	Fancg	0.371561	3.10681
1453236_at	nipsnap homolog 3A (C. elegans)	Nipsnap3a	0.431735	3.10665
1429782_at	gene rich cluster, C10 gene	Grcc10	0.188838	3.10491
1420111_at	zinc finger protein 334	Zfp334	0.421682	3.10391
1431835_at	transcription elongation regulator 1-like	Tcerg1l	0.398043	3.10071
1421428_at	solute carrier family 5 (choline transporter), member 7	Slc5a7	0.493399	3.0974
1449471_at	potassium large conductance calcium-activated channel, subfamily M, beta member 4	Kcnmb4	0.363469	3.0951
1428504_at	X-ray repair complementing defective repair in Chinese hamster cells 6	Xrcc6	0.416559	3.0916
1457422_at	unc-79 homolog (C. elegans)	Unc79	0.233265	3.09084
1435599_at	cerebral cavernous malformation 2-like	Ccm2l	0.368836	3.08924
1440005_at	one cut domain, family member 2	Onecut2	0.283165	3.08893
1436651_at	PR domain containing 11	Prdm11	0.367549	3.08752
1455615_at	chemokine-like factor	Cklf	0.54088	3.08737
1422377_at	vomeronasal 1 receptor 44	Vmn1r44	0.204237	3.08402
1457686_at	A kinase (PRKA) anchor protein 17B	Akap17b	0.190739	3.08268
1446867_at	WD repeat and FYVE domain containing 4	Wdfy4	0.333079	3.07849
1456151_at	zinc finger protein 358	Zfp358	0.262811	3.07652
1443245_at	SET domain, bifurcated 1 pseudogene	Gm4349	0.296335	3.0728
1454221_a_at	kinesin family member 2C	Kif2c	0.227306	3.07196
1451844_at	prolactin receptor	Prlr	0.131415	3.07191
1457838_at	cell division cycle 45	Cdc45	0.455627	3.06685
1436675_at	WD repeat domain 63	Wdr63	0.36941	3.06473
1420060_s_at	expressed sequence AA675344	AA675344	0.378781	3.06471
1424152_at	sal-like 4 (Drosophila)	Sall4	0.333478	3.05832
1451696_at	zinc finger protein 64	Zfp64	0.215145	3.05764
1426019_at	phospholipase A2, activating protein	Plaa	0.0972536	3.05494
1422012_at	corticotropin releasing hormone receptor 2	Crhr2	0.471436	3.05032
1457574_at	F-box and WD-40 domain protein 23	Fbxw23	0.664413	3.04357
1422395_at	vomeronasal 1 receptor 25 /// vomeronasal 1 receptor 30	Vmn1r25 /// Vmn1r30	0.198504	3.04174
1431296_at	G protein-coupled receptor 15	Gpr15	0.256636	3.04155
1443454_at	secretin receptor	Sctr	0.256356	3.04088
1420864_at	zinc finger and BTB domain containing 14	Zbtb14	0.335062	3.03398
1460106_at	HYDIN, axonemal central pair apparatus protein	Hydin	0.0917672	3.03348
1441429_at	insulin receptor substrate 4	Irs4	0.199499	3.0322
1460128_at	transmembrane emp24 domain trafficking protein 2	Tmed2	0.322218	3.03099
1419799_at	ribosomal protein L27A	Rpl27a	0.194418	3.0278
1431541_at	predicted gene 9757	Gm9757	0.241829	3.02712
1426154_s_at	predicted gene, 21320 /// novel member of the major urinary protein (Mup) gene family /// major urinary protein 1 /// major urinary protein 10 /// major urinary protein 11 /// major urinary protein 14 /// major urinary protein 16 /// major urinary protein 19 /// major urinary protein 2 /// major urinary protein 3 /// major urinary protein 9	Gm21320 /// LOC100048884 /// Mup1 /// Mup10 /// Mup11 /// Mup14 /// Mup16 /// Mup19 /// Mup2 /// Mup3 /// Mup9	0.566099	3.02665
1459058_at	sialic acid acetylesterase	Siae	0.116614	3.02447
1442347_at	low density lipoprotein receptor-related protein 8, apolipoprotein e receptor	Lrp8	0.175593	3.02421
1419490_at	family with sequence similarity 19, member A5	Fam19a5	0.350793	3.01887
1423834_s_at	golgi associated, gamma adaptin ear containing, ARF binding protein 1	Gga1	0.382518	3.01236
1460371_at	heat shock protein 12B	Hspa12b	0.0664745	3.01217
1442304_at	predicted gene 3916	Gm3916	0.293835	3.00954
1443746_x_at	dentin matrix protein 1	Dmp1	0.340749	3.00655
1458596_at	dynactin 4	Dctn4	0.462974	3.0065
1437243_at	D-2-hydroxyglutarate dehydrogenase	D2hgdh	0.234141	3.00538
1428048_at	uncharacterized LOC269472	LOC269472	0.641813	2.99754
1430482_at	adenosine A3 receptor	Adora3	0.394036	2.99734
1425401_at	cleavage and polyadenylation specific factor 4-like	Cpsf4l	0.463438	2.99648
1421702_at	retinol dehydrogenase 1 (all trans)	Rdh1	0.578435	2.99445
1421581_at	potassium inwardly-rectifying channel, subfamily J, member 6	Kcnj6	0.195044	2.98887
1452019_at	cysteine and tyrosine-rich protein 1	Cyyr1	0.191732	2.97709
1430818_at	transmembrane channel-like gene family 1	Tmc1	0.559621	2.97664
1456993_at	DNA segment, Chr 2, ERATO Doi 640, expressed	D2Ertd640e	0.476045	2.97604
1457620_at	TRM2 tRNA methyltransferase 2A	Trmt2a	0.276936	2.97256
1459212_at	anaphase promoting complex subunit 11	Anapc11	0.329281	2.97213
1444894_at	protein tyrosine phosphatase, non-receptor type 18	Ptpn18	0.424695	2.97052
1456729_x_at	regulator of telomere elongation helicase 1	Rtel1	0.637563	2.96667
1436178_at	leprecan-like 1	Leprel1	0.283547	2.96569
1459475_at	DNA segment, Chr 10, ERATO Doi 761, expressed	D10Ertd761e	0.106268	2.96544
1459210_at	transmembrane protein 108	Tmem108	0.273617	2.96397
1443817_x_at	NK2 transcription factor related, locus 6 (Drosophila)	Nkx2-6	0.213871	2.96305
1421170_a_at	phospholipase C, beta 1	Plcb1	0.574711	2.96261
1427346_at	predicted gene 10439 /// predicted gene 15080 /// predicted gene 15085 /// predicted gene 15093 /// predicted gene 15107 /// predicted gene 15114 /// predicted gene 15128 /// leucine zipper protein 4 /// ovary testis transcribed	Gm10439 /// Gm15080 /// Gm15085 /// Gm15093 /// Gm15107 /// Gm15114 /// Gm15128 /// Luzp4 /// Ott	0.172797	2.96021
1460379_at	homeobox B4	Hoxb4	0.563039	2.95875
1427298_at	dynamin 3, opposite strand	Dnm3os	0.429846	2.95857
1421157_at	frizzled homolog 3 (Drosophila)	Fzd3	0.147754	2.95443
1447197_at	expressed sequence C86544	C86544	0.12756	2.95056
1441299_at	leucine rich adaptor protein 1-like	Lurap1l	0.31093	2.94663
1442842_at	Hspb associated protein 1	Hspbap1	0.0474482	2.94465
1434983_at	coiled-coil domain containing 108	Ccdc108	0.284436	2.94313
1430552_a_at	SET binding factor 1	Sbf1	0.230412	2.94231
1437523_s_at	sarcoglycan, gamma (dystrophin-associated glycoprotein)	Sgcg	0.0111298	2.93879
1450592_at	olfactory receptor 68 /// olfactory receptor 69	Olfr68 /// Olfr69	0.361886	2.93834
1419629_at	mesoderm posterior 2	Mesp2	0.0976597	2.93604
1422399_a_at	RAB23, member RAS oncogene family	Rab23	0.525039	2.93553
1428019_at	MYCBP-associated, testis expressed 1	Maats1	0.595492	2.93389
1437876_at	interleukin 20 receptor beta	Il20rb	0.289103	2.9317
1439935_at	placenta-specific 1-like	Plac1l	0.200937	2.93144
1429680_at	transformer 2 alpha homolog (Drosophila)	Tra2a	0.635123	2.9268
1425889_at	wingless-type MMTV integration site 9A	Wnt9a	0.407903	2.91861
1423171_at	G-protein coupled receptor 88	Gpr88	0.254787	2.91836
1432001_at	MSS51 mitochondrial translational activator	Mss51	0.147765	2.91301
1417416_at	potassium voltage-gated channel, shaker-related subfamily, member 1	Kcna1	0.188949	2.91156
1439666_at	outer dense fiber of sperm tails 3B	Odf3b	0.0991709	2.90551
1419216_at	5-azacytidine induced gene 1	Azi1	0.115275	2.90278
1439936_at	cDNA sequence BE949265	BE949265	0.153806	2.90046
1416460_at	myo-inositol oxygenase	Miox	0.301406	2.89952
1439181_at	zinc finger protein 658	Zfp658	0.36188	2.89718
1422346_at	NK2 homeobox 1	Nkx2-1	0.175244	2.89687
1443315_at	dystrophin, muscular dystrophy	Dmd	0.235914	2.89642
1429561_at	BRF2, subunit of RNA polymerase III transcription initiation factor, BRF1-like	Brf2	0.31365	2.88438
1438875_at	zinc finger protein 616	Zfp616	0.218675	2.87848
1449917_at	paired-like homeodomain transcription factor 3	Pitx3	0.423622	2.8761
1451055_at	solute carrier family 45, member 2	Slc45a2	0.624166	2.87202
1457215_at	predicted gene 13111	Gm13111	0.198058	2.86324
1443930_at	zinc finger protein 811	Zfp811	0.0577608	2.86096
1418519_at	aminoadipate aminotransferase	Aadat	0.218945	2.85933
1458499_at	phosphodiesterase 10A	Pde10a	0.227523	2.85554
1444731_at	phosphodiesterase 4B, cAMP specific	Pde4b	0.266503	2.85297
1425224_at	slowmo homolog 1 (Drosophila)	Slmo1	0.41727	2.84977
1440641_at	vacuolar protein sorting 29 (S. pombe)	Vps29	0.371407	2.84829
1442085_at	Wolf-Hirschhorn syndrome candidate 1-like 1 (human)	Whsc1l1	0.335145	2.8467
1442810_x_at	sodium channel, voltage-gated, type IX, alpha	Scn9a	0.121241	2.83999
1422961_at	N-acetyltransferase 3	Nat3	0.0812947	2.83912
1423967_at	paralemmin	Palm	0.0926363	2.83853
1425998_at	synaptotagmin-like 4	Sytl4	0.162383	2.83559
1418922_at	cell adhesion molecule 3	Cadm3	0.617955	2.83452
1449381_a_at	protein kinase C and casein kinase substrate in neurons 1	Pacsin1	0.220727	2.83204
1458443_at	CREB regulated transcription coactivator 1	Crtc1	0.284011	2.82839
1435984_at	zinc finger protein 40	Zfp40	0.157085	2.82781
1431160_x_at	predicted gene, 19924	Gm19924	0.437451	2.82743
1449866_at	synaptotagmin II	Syt2	0.181753	2.82603
1422701_at	zeta-chain (TCR) associated protein kinase	Zap70	0.35988	2.8252
1432353_at	La ribonucleoprotein domain family, member 1B /// la-related protein 1B-like	Larp1b /// LOC100503217	0.223457	2.82412
1450206_at	deleted in liver cancer 1	Dlc1	0.446449	2.82369
1450468_at	myocilin	Myoc	0.227164	2.82253
1433950_at	immunoglobulin superfamily, member 21	Igsf21	0.322594	2.822
1436410_at	Rho guanine nucleotide exchange factor (GEF) 33	Arhgef33	0.32074	2.81986
1445358_at	tankyrase, TRF1-interacting ankyrin-related ADP-ribose polymerase	Tnks	0.423244	2.81891
1435963_at	sema domain, seven thrombospondin repeats (type 1 and type 1-like), transmembrane domain (TM) and short cytoplasmic domain, (semaphorin) 5B	Sema5b	0.412101	2.81783
1431320_a_at	myosin VA	Myo5a	0.23977	2.80745
1453611_at	retinoblastoma binding protein 6	Rbbp6	0.13067	2.80155
1446746_at	oxysterol binding protein-like 3	Osbpl3	0.309635	2.80039
1453950_a_at	X-ray repair complementing defective repair in Chinese hamster cells 2	Xrcc2	0.249944	2.79501
1425165_at	granzyme N	Gzmn	0.156912	2.79272
1421541_a_at	myocyte enhancer factor 2B	Mef2b	0.54849	2.79198
1456838_at	leucine rich repeat and Ig domain containing 3	Lingo3	0.0708876	2.7899
1441707_at	proteasome (prosome, macropain) subunit, alpha type 3	Psma3	0.212981	2.78955
1419412_at	chemokine (C motif) ligand 1	Xcl1	0.339146	2.78651
1417571_at	N-methylpurine-DNA glycosylase	Mpg	0.600931	2.78572
1452468_s_at	methylmalonic aciduria (cobalamin deficiency) type B homolog (human)	Mmab	0.252305	2.78476
1459781_x_at	transformation related protein 53	Trp53	0.0728268	2.78264
1450244_a_at	mitogen-activated protein kinase kinase kinase kinase 2	Map4k2	0.19801	2.78013
1421180_at	limb expression 1 homolog (chicken)	Lix1	0.200359	2.77952
1448045_at	predicted gene 10658	Gm10658	0.261132	2.77601
1421773_at	ets variant gene 2	Etv2	0.173918	2.77597
1421117_at	dystonin	Dst	0.391807	2.7756
1423377_at	insulin-like growth factor binding protein-like 1	Igfbpl1	0.294092	2.77403
1454946_at	myeloblastosis oncogene-like 2	Mybl2	0.565974	2.77218
1425000_s_at	proline and serine rich 2	Proser2	0.560319	2.77182
1429948_x_at	crystallin, gamma F	Crygf	0.588257	2.7676
1454957_at	NIN1/RPN12 binding protein 1 homolog (S. cerevisiae)	Nob1	0.486444	2.76648
1442971_at	bromodomain adjacent to zinc finger domain, 2B	Baz2b	0.522841	2.76446
1451690_a_at	poliovirus receptor-related 4	Pvrl4	0.355609	2.76379
1456596_at	transmembrane protein 255A	Tmem255a	0.119057	2.76369
1459833_x_at	calcium and integrin binding family member 2	Cib2	0.250091	2.76343
1437834_s_at	protein kinase C and casein kinase substrate in neurons 3	Pacsin3	0.423505	2.76247
1455526_at	DIRAS family, GTP-binding RAS-like 1	Diras1	0.596369	2.75835
1421966_at	neural cell adhesion molecule 1	Ncam1	0.52356	2.75813
1428888_at	transmembrane protein 33	Tmem33	0.604356	2.75751
1441908_x_at	CD93 antigen	Cd93	0.0344993	2.75094
1460449_at	ankyrin repeat and sterile alpha motif domain containing 1B	Anks1b	0.151259	2.7507
1416169_at	trophoblast specific protein beta	Tpbpb	0.415249	2.75054
1459664_at	WD repeat domain 31	Wdr31	0.375855	2.74896
1439416_x_at	tubulin, beta 4B class IVB	Tubb4b	0.0345706	2.74773
1421017_at	neuregulin 3	Nrg3	0.195109	2.7439
1419993_at	RAB3A interacting protein (rabin3)-like 1	Rab3il1	0.321239	2.74347
1436855_at	protein tyrosine phosphatase, receptor type, S	Ptprs	0.304658	2.74305
1433156_at	Kv channel-interacting protein 1	Kcnip1	0.225662	2.73837
1427669_a_at	citron	Cit	0.482531	2.73619
1447436_at	expressed sequence AI451250	AI451250	0.330418	2.73386
1443250_at	regulator of G-protein signaling 2	Rgs2	0.548012	2.73373
1451590_at	complexin 4	Cplx4	0.394522	2.73205
1443973_at	dapper homolog 2, antagonist of beta-catenin (xenopus)	Dact2	0.409255	2.73205
1447889_x_at	mannosidase, endo-alpha-like	Maneal	0.474535	2.73098
1430219_at	thymoma viral proto-oncogene 1 interacting protein	Aktip	0.0532635	2.7294
1459919_a_at	MOB kinase activator 3C	Mob3c	0.373999	2.72801
1419937_at	predicted gene 12264	Gm12264	0.539221	2.72409
1431396_at	IQ motif containing GTPase activating protein 1	Iqgap1	0.61673	2.72215
1416822_at	DiGeorge syndrome critical region gene 14	Dgcr14	0.601585	2.72123
1456816_at	zinc finger, MIZ-type containing 1	Zmiz1	0.282599	2.72092
1459586_at	expressed sequence C78452	C78452	0.298958	2.72081
1420433_at	TAF7-like RNA polymerase II, TATA box binding protein (TBP)-associated factor	Taf7l	0.39305	2.71296
1449632_s_at	FK506 binding protein 10	Fkbp10	0.199905	2.71255
1454374_at	CD302 antigen	Cd302	0.20126	2.7115
1420595_at	distal-less homeobox 4	Dlx4	0.0854419	2.71113
1422152_at	H6 homeobox 1	Hmx1	0.497001	2.70969
1432159_a_at	testis expressed gene 13	Tex13	0.426901	2.70861
1436206_at	F-box protein 10	Fbxo10	0.237774	2.70674
1456527_at	HECT, C2 and WW domain containing E3 ubiquitin protein ligase 1	Hecw1	0.22949	2.70556
1454091_at	pregnancy-specific glycoprotein 21	Psg21	0.386484	2.70257
1437812_x_at	alpha glucosidase 2 alpha neutral subunit	Ganab	0.221419	2.69487
1424849_at	WD repeat-containing protein 62-like /// WD repeat domain 62	LOC100862584 /// Wdr62	0.297979	2.69077
1437217_at	ankyrin repeat domain 6	Ankrd6	0.441874	2.69076
1431608_at	amyotrophic lateral sclerosis 2 (juvenile)	Als2	0.526552	2.68177
1431725_at	formin 2	Fmn2	0.375957	2.68096
1450004_at	thymic stromal lymphopoietin	Tslp	0.605918	2.68087
1449204_at	gap junction protein, beta 5	Gjb5	0.0569868	2.68083
1434007_at	glycosyltransferase-like 1B	Gyltl1b	0.54448	2.67984
1421916_at	platelet derived growth factor receptor, alpha polypeptide	Pdgfra	0.340002	2.67683
1459346_at	tRNA splicing endonuclease 2 homolog (S. cerevisiae)	Tsen2	0.177462	2.6757
1421126_at	ryanodine receptor 2, cardiac	Ryr2	0.439264	2.67126
1447941_x_at	Braf transforming gene	Braf	0.24784	2.67101
1456034_at	tetratricopeptide repeat domain 18	Ttc18	0.478871	2.66991
1426059_at	glucokinase regulatory protein	Gckr	0.336326	2.66762
1430562_at	zinc finger with KRAB and SCAN domains 5	Zkscan5	0.45718	2.66752
1435621_at	fatty acyl CoA reductase 2	Far2	0.414769	2.66607
1449977_at	early growth response 4	Egr4	0.494019	2.6617
1434728_at	glutamate receptor, ionotropic, AMPA3 (alpha 3)	Gria3	0.0550861	2.65665
1454265_a_at	ATP-binding cassette, sub-family B (MDR/TAP), member 10	Abcb10	0.160391	2.6529
1438779_at	collagen, type IV, alpha 3	Col4a3	0.140618	2.65245
1456644_at	Myb/SANT-like DNA-binding domain containing 3	Msantd3	0.349599	2.65238
1450485_at	SRY-box containing gene 3	Sox3	0.0871622	2.65162
1440245_at	coiled-coil domain containing 88B	Ccdc88b	0.580272	2.6515
1439826_at	heat shock protein 14	Hspa14	0.442226	2.64895
1422925_s_at	acyl-CoA thioesterase 3	Acot3	0.412113	2.64775
1440707_at	doublesex and mab-3 related transcription factor 3	Dmrt3	0.131056	2.64213
1426795_at	protein tyrosine phosphatase, receptor type, S	Ptprs	0.6249	2.64177
1436065_at	chemokine (C-C motif) receptor 9	Ccr9	0.523824	2.64101
1427836_at	excision repair cross-complementing rodent repair deficiency, complementation group 6 like 2	Ercc6l2	0.450456	2.63689
1448073_at	uncharacterized LOC541456	Image:619641	0.472374	2.63413
1427799_x_at	immunoglobulin kappa chain variable 28 (V28) /// immunoglobulin kappa variable 6-14 /// immunoglobulin kappa variable 6-23	Igk-V28 /// Igkv6-14 /// Igkv6-23	0.23529	2.63386
1415931_at	insulin-like growth factor 2	Igf2	0.584414	2.62897
1456047_at	jumonji domain containing 7 /// phospholipase A2, group IVB (cytosolic)	Jmjd7 /// Pla2g4b	0.534966	2.61868
1449999_a_at	calcium channel, voltage-dependent, alpha2/delta subunit 1	Cacna2d1	0.159334	2.61267
1444572_at	monocyte to macrophage differentiation-associated 2	Mmd2	0.277454	2.60618
1430669_at	keratin associated protein 4-7	Krtap4-7	0.290781	2.60513
1456697_x_at	cyclin D binding myb-like transcription factor 1	Dmtf1	0.160372	2.60311
1447308_at	ceramide synthase 5	Cers5	0.401531	2.60305
1430142_at	transglutaminase 5	Tgm5	0.585207	2.60103
1422248_at	insulin receptor substrate 4	Irs4	0.637932	2.59978
1439690_at	idnK gluconokinase homolog (E. coli)	Idnk	0.206506	2.59783
1444053_at	single-stranded DNA binding protein 1	Ssbp1	0.167506	2.59727
1441560_at	catenin (cadherin associated protein), alpha 3	Ctnna3	0.432574	2.59479
1458455_at	actin-binding Rho activating protein	Abra	0.0943505	2.58982
1445158_at	synaptophysin-like protein	Sypl	0.580347	2.58925
1444864_at	DNA segment, Chr 12, ERATO Doi 125, expressed	D12Ertd125e	0.425226	2.58745
1436208_at	ankyrin repeat and SOCS box-containing 1	Asb1	0.13179	2.58586
1431743_a_at	solute carrier family 4 (anion exchanger), member 1	Slc4a1	0.125363	2.58425
1428977_at	carbohydrate (N-acetylgalactosamine 4-0) sulfotransferase 8	Chst8	0.591016	2.58381
1458231_at	predicted gene 6600	Gm6600	0.542671	2.58344
1433373_at	suppressor of Ty 7-like	Supt7l	0.154109	2.57941
1436129_at	a disintegrin and metallopeptidase domain 6B	Adam6b	0.191401	2.57744
1421372_at	kallikrein 1-related pepidase b4	Klk1b4	0.25571	2.57499
1444537_at	expressed sequence AI429363	AI429363	0.409164	2.5735
1421091_at	serine (or cysteine) peptidase inhibitor, clade A (alpha-1 antiproteinase, antitrypsin), member 12	Serpina12	0.498164	2.56921
1451795_at	target of myb1-like 2 (chicken)	Tom1l2	0.557946	2.5687
1440526_at	RGD motif, leucine rich repeats, tropomodulin domain and proline-rich containing	Rltpr	0.472625	2.5656
1457871_at	collectin sub-family member 10	Colec10	0.154403	2.56556
1425337_at	solute carrier family 12, member 5	Slc12a5	0.189958	2.56364
1417546_at	interleukin 2 receptor, beta chain	Il2rb	0.326832	2.5614
1425426_a_at	myocyte enhancer factor 2A	Mef2a	0.105513	2.56016
1439567_at	T-box 3	Tbx3	0.459604	2.55978
1420749_a_at	POU domain, class 6, transcription factor 1	Pou6f1	0.35955	2.55705
1449238_at	pregnancy specific glycoprotein 16	Psg16	0.614729	2.55593
1430110_at	gap junction protein, epsilon 1	Gje1	0.252707	2.55208
1448924_at	transmembrane protein 186	Tmem186	0.25073	2.55097
1424764_at	seizure related 6 homolog like	Sez6l	0.348575	2.5461
1425800_at	RAD9 homolog B	Rad9b	0.652577	2.54373
1447892_at	glyceraldehyde-3-phosphate dehydrogenase pseudogene	Gm7788	0.537773	2.54163
1460616_at	solute carrier organic anion transporter family member 4C1-like /// solute carrier organic anion transporter family, member 4C1	LOC101056347 /// Slco4c1	0.347546	2.54138
1453320_at	primary cilia formation	Pifo	0.237915	2.54088
1457819_at	sodium channel, voltage-gated, type IX, alpha	Scn9a	0.46037	2.54006
1426320_at	sorting nexin 29	Snx29	0.193135	2.53938
1427676_a_at	glutamate receptor, ionotropic, kainate 1	Grik1	0.292907	2.53717
1449235_at	Fas ligand (TNF superfamily, member 6)	Fasl	0.151958	2.52848
1420031_at	checkpoint kinase 1	Chek1	0.298648	2.52787
1443372_at	predicted gene 2990	Gm2990	0.213476	2.52392
1420818_at	src-like adaptor	Sla	0.486726	2.52273
1436667_at	solute carrier family 6 (neurotransmitter transporter), member 20B	Slc6a20b	0.0928709	2.52174
1442582_at	germinal center associated, signaling and motility	Gcsam	0.499387	2.51798
1418160_at	makorin, ring finger protein, 3	Mkrn3	0.417094	2.51382
1439190_at	forkhead-associated (FHA) phosphopeptide binding domain 1	Fhad1	0.50447	2.50989
1431121_at	angiomotin-like 1	Amotl1	0.396358	2.50916
1460617_s_at	RAB6B, member RAS oncogene family	Rab6b	0.259396	2.50891
1440442_at	predicted gene 14378 /// mitogen-activated protein kinase kinase 7	Gm14378 /// Map2k7	0.25991	2.50538
1415896_x_at	small nuclear ribonucleoprotein N /// SNRPN upstream reading frame	Snrpn /// Snurf	0.498098	2.50496
1418903_at	aquaporin 2	Aqp2	0.469002	2.50251
1444455_at	calcium channel, voltage-dependent, P/Q type, alpha 1A subunit	Cacna1a	0.61074	2.50078
1427654_a_at	5 hydroxytryptamine (serotonin) receptor 4	Htr4	0.527916	2.49772
1443102_at	zinc finger protein 597	Zfp597	0.145228	2.49772
1443535_at	RAB GTPase activating protein 1	Rabgap1	0.367033	2.49692
1444953_at	nuclear casein kinase and cyclin-dependent kinase substrate 1	Nucks1	0.429928	2.49664
1448522_at	seryl-aminoacyl-tRNA synthetase 2	Sars2	0.35455	2.49653
1456382_at	ATPase family, AAA domain containing 1	Atad1	0.162646	2.49641
1432006_at	adaptor-related protein complex 2, alpha 2 subunit	Ap2a2	0.492235	2.49562
1446353_at	tubulin, beta 6 class V	Tubb6	0.651718	2.49357
1453482_at	CASP8 and FADD-like apoptosis regulator	Cflar	0.573843	2.49249
1416797_at	non-catalytic region of tyrosine kinase adaptor protein 2	Nck2	0.5896	2.4914
1418307_a_at	spermine binding protein /// spermine binding protein-like	Sbp /// Sbpl	0.272136	2.48931
1431824_at	cadherin 13	Cdh13	0.107793	2.48481
1417717_a_at	tyrosinase	Tyr	0.415725	2.48374
1447829_x_at	TAF9B RNA polymerase II, TATA box binding protein (TBP)-associated factor	Taf9b	0.173282	2.48081
1420423_at	T cell leukemia/lymphoma 1B, 4	Tcl1b4	0.443598	2.48068
1456252_x_at	adaptor-related protein complex 1, sigma 2 subunit	Ap1s2	0.0617015	2.48031
1450973_s_at	mitogen-activated protein kinase binding protein 1	Mapkbp1	0.400296	2.47852
1423166_at	CD36 antigen	Cd36	0.56105	2.47588
1451915_at	chaperonin containing Tcp1, subunit 3 (gamma)	Cct3	0.20168	2.47535
1442838_at	predicted gene 11691	Gm11691	0.612007	2.47532
1457030_at	miRNA containing gene	Mirg	0.346051	2.47384
1460059_at	uridine phosphorylase 2	Upp2	0.348155	2.47362
1438796_at	nuclear receptor subfamily 4, group A, member 3	Nr4a3	0.4401	2.47306
1446678_at	DNA segment, Chr 14, ERATO Doi 16, expressed	D14Ertd16e	0.258986	2.47107
1447138_at	expressed sequence AI853502	AI853502	0.436185	2.47102
1424123_at	major facilitator superfamily domain containing 7C	Mfsd7c	0.366008	2.46966
1459848_x_at	dopamine beta hydroxylase	Dbh	0.366287	2.46866
1422392_at	vomeronasal 1 receptor 15	Vmn1r15	0.375302	2.46751
1446712_at	neurotrophic tyrosine kinase, receptor, type 2	Ntrk2	0.667131	2.46658
1460353_at	transmembrane protein 48	Tmem48	0.455312	2.46638
1438461_at	KH domain containing, RNA binding, signal transduction associated 1	Khdrbs1	0.498371	2.46557
1435951_at	glutamate receptor interacting protein 1	Grip1	0.21801	2.46382
1450298_at	tumor necrosis factor (ligand) superfamily, member 14	Tnfsf14	0.300504	2.45891
1448207_at	LIM and SH3 protein 1	Lasp1	0.213756	2.45826
1441979_at	EF-hand calcium binding domain 12	Efcab12	0.485208	2.45799
1449892_at	lysozyme-like 1	Lyzl1	0.211574	2.44737
1456077_x_at	cell division cycle 25C	Cdc25c	0.372846	2.44298
1440674_at	EGF-like repeats and discoidin I-like domains 3	Edil3	0.167771	2.44012
1443964_at	transmembrane inner ear	Tmie	0.240177	2.43975
1432139_at	serine/arginine-rich protein specific kinase 3	Srpk3	0.548711	2.43852
1452641_at	YjeF N-terminal domain containing 3	Yjefn3	0.221313	2.43842
1437036_at	staphylococcal nuclease and tudor domain containing 1	Snd1	0.0561027	2.4378
1438808_at	transformation related protein 53	Trp53	0.380674	2.43674
1440472_at	sperm associated antigen 17	Spag17	0.228157	2.43169
1426621_a_at	protein phosphatase 2 (formerly 2A), regulatory subunit B (PR 52), beta isoform	Ppp2r2b	0.328426	2.42632
1431731_at	BCL2/adenovirus E1B interacting protein 2	Bnip2	0.3556	2.42053
1449838_at	cysteine-rich secretory protein 3	Crisp3	0.0407827	2.41841
1454907_at	small EDRK-rich factor 1	Serf1	0.188765	2.41743
1434466_at	ataxia, cerebellar, Cayman type homolog (human)	Atcay	0.439418	2.41702
1427631_x_at	major urinary protein 3	Mup3	0.0860947	2.41639
1419520_at	N-acetyltransferase 8 (GCN5-related, putative)	Nat8	0.553769	2.41562
1422406_at	interferon alpha 9	Ifna9	0.118854	2.41345
1449430_a_at	trehalase (brush-border membrane glycoprotein)	Treh	0.0685317	2.41316
1450602_at	vomeronasal 1 receptor 14	Vmn1r14	0.42802	2.41282
1444780_at	neuron navigator 2	Nav2	0.377694	2.4117
1442960_at	mucin 20	Muc20	0.152346	2.40921
1422371_at	olfactory receptor 1507	Olfr1507	0.432887	2.40852
1429838_at	sperm associated antigen 16	Spag16	0.404513	2.40686
1419555_at	E74-like factor 5	Elf5	0.0910701	2.40647
1451863_at	urotensin 2 receptor	Uts2r	0.359607	2.40519
1420659_at	SLAM family member 6	Slamf6	0.505458	2.40209
1450216_at	protocadherin beta 16	Pcdhb16	0.345454	2.39986
1439193_at	paired related homeobox protein-like 1	Prrxl1	0.193494	2.39959
1446405_at	K(lysine) acetyltransferase 6A	Kat6a	0.570201	2.39952
1420428_at	advanced glycosylation end product-specific receptor	Ager	0.316079	2.39798
1456989_at	oxoglutarate (alpha-ketoglutarate) receptor 1	Oxgr1	0.266155	2.39736
1445195_at	expressed sequence C77631	C77631	0.404552	2.39594
1436124_at	phosphate cytidylyltransferase 1, choline, beta isoform	Pcyt1b	0.294978	2.39427
1419733_at	GLI pathogenesis-related 1 like 2	Glipr1l2	0.378505	2.39399
1457738_at	LSM14 homolog A (SCD6, S. cerevisiae)	Lsm14a	0.0500986	2.39236
1427519_at	adenosine A2a receptor	Adora2a	0.156615	2.39048
1444632_at	cDNA sequence BC064078	BC064078	0.581467	2.38813
1431416_a_at	junction adhesion molecule 2	Jam2	0.333414	2.38678
1442203_at	GM2 ganglioside activator protein	Gm2a	0.416229	2.38675
1422992_s_at	phosphatidylinositol 3-kinase catalytic delta polypeptide	Pik3cd	0.204266	2.38511
1446719_at	ATPase family, AAA domain containing 2B	Atad2b	0.573744	2.3848
1446827_at	nuclear receptor coactivator 2	Ncoa2	0.419801	2.3846
1423484_at	bicaudal C homolog 1 (Drosophila)	Bicc1	0.431741	2.38417
1450352_at	melatonin receptor 1A	Mtnr1a	0.513322	2.38285
1419192_at	interleukin 4 induced 1 /// Nup62-Il4i1 protein	Il4i1 /// Nup62-il4i1	0.331427	2.38152
1420392_at	ubiquitin-like 4B	Ubl4b	0.425503	2.37952
1422326_at	glucose-6-phosphate dehydrogenase 2	G6pd2	0.480039	2.37684
1458264_at	expressed sequence AW046200	AW046200	0.209899	2.3759
1421815_at	ependymin related protein 1 (zebrafish)	Epdr1	0.317009	2.37543
1455888_at	leucine rich repeat and Ig domain containing 2	Lingo2	0.0507669	2.37521
1417945_at	POU domain, class 5, transcription factor 1	Pou5f1	0.386313	2.37514
1457131_at	furry homolog (Drosophila)	Fry	0.632242	2.37352
1421561_at	basic helix-loop-helix family, member e23	Bhlhe23	0.515174	2.37218
1457728_at	family with sequence similarity 129, member C	Fam129c	0.435563	2.36796
1443542_at	expressed sequence AU022252	AU022252	0.408258	2.36585
1437950_at	family with sequence similarity 149, member A	Fam149a	0.365092	2.36543
1457509_at	sno, strawberry notch homolog 1 (Drosophila)	Sbno1	0.445028	2.35943
1442244_at	InaD-like (Drosophila)	Inadl	0.212029	2.35772
1450653_at	spermatogenic leucine zipper 1	Spz1	0.118488	2.35613
1431134_at	inhibitor of growth family, member 5	Ing5	0.396636	2.35534
1425666_at	zinc finger protein of the cerebellum 5	Zic5	0.322049	2.35491
1448581_at	zinc finger protein 346	Zfp346	0.601993	2.35432
1447290_at	SYS1 Golgi-localized integral membrane protein homolog (S. cerevisiae)	Sys1	0.645848	2.35381
1445927_at	DNA segment, Chr 13, ERATO Doi 212, expressed	D13Ertd212e	0.521925	2.35359
1449104_at	uroplakin 3A	Upk3a	0.450773	2.35328
1424482_at	Rho guanine nucleotide exchange factor (GEF7)	Arhgef7	0.491604	2.35305
1438375_at	fibulin 2	Fbln2	0.267945	2.35186
1432008_at	transmembrane protein 86B	Tmem86b	0.363929	2.35165
1450080_at	CAAX box 1C	Cxx1c	0.261197	2.35073
1454438_at	RAB27A, member RAS oncogene family	Rab27a	0.400267	2.34945
1455114_at	cyclin O	Ccno	0.583882	2.34924
1443924_at	WNK lysine deficient protein kinase 3	Wnk3	0.154501	2.34907
1422296_at	suppressor of IKBKE 1	Sike1	0.252003	2.34826
1417187_at	ubiquitin-conjugating enzyme E2K	Ube2k	0.463194	2.34823
1455701_at	Rho GTPase activating protein 33	Arhgap33	0.583153	2.34756
1438071_at	postmeiotic segregation increased 1 (S. cerevisiae)	Pms1	0.420962	2.34464
1419943_s_at	cyclin B1 /// predicted gene 5593 /// G2/mitotic-specific cyclin-B1-like	Ccnb1 /// Gm5593 /// LOC101056596	0.463115	2.34283
1441964_at	quaking	Qk	0.194998	2.34083
1418309_at	tumor necrosis factor receptor superfamily, member 11b (osteoprotegerin)	Tnfrsf11b	0.362688	2.34006
1455966_s_at	nudix (nucleoside diphosphate linked moiety X)-type motif 21	Nudt21	0.2154	2.33965
1447431_at	2-deoxyribose-5-phosphate aldolase homolog (C. elegans)	Dera	0.645904	2.33957
1438628_x_at	contactin 3	Cntn3	0.333149	2.33803
1453891_at	polymerase I and transcript release factor	Ptrf	0.173016	2.33651
1456165_at	aldo-keto reductase family 1, member C-like	Akr1cl	0.279286	2.33469
1458730_at	predicted gene, 20066	Gm20066	0.226435	2.33435
1441162_at	Rho-associated coiled-coil containing protein kinase 1	Rock1	0.507556	2.33426
1433946_at	zinc finger protein interacting with K protein 1	Zik1	0.234576	2.3324
1455609_at	citron	Cit	0.358273	2.33008
1420958_at	SYS1 Golgi-localized integral membrane protein homolog (S. cerevisiae)	Sys1	0.345139	2.3286
1458033_at	ubiquitin protein ligase E3 component n-recognin 1	Ubr1	0.587919	2.32587
1420247_at	galactosidase, beta 1-like	Glb1l	0.253215	2.32469
1431667_s_at	EF-hand calcium binding domain 11	Efcab11	0.505461	2.31876
1420569_at	chondroadherin	Chad	0.660892	2.31577
1458784_at	expressed sequence C78148	C78148	0.0766445	2.31332
1455987_at	Sec61 alpha 1 subunit (S. cerevisiae)	Sec61a1	0.517985	2.31003
1458032_at	tumor protein D52-like 2	Tpd52l2	0.322791	2.30791
1435773_at	PARP1 binding protein	Parpbp	0.504029	2.30789
1459863_x_at	golgi associated, gamma adaptin ear containing, ARF binding protein 1	Gga1	0.493702	2.30511
1443713_at	cell adhesion molecule with homology to L1CAM	Chl1	0.394302	2.3039
1422494_s_at	cyclin-dependent kinase 20	Cdk20	0.310538	2.30308
1453455_at	calmodulin binding transcription activator 1	Camta1	0.133046	2.30091
1431038_at	Ras association (RalGDS/AF-6) domain family member 4	Rassf4	0.643399	2.29833
1420576_at	lysophosphatidic acid receptor 2	Lpar2	0.469722	2.29807
1426452_a_at	RAB30, member RAS oncogene family	Rab30	0.0865266	2.29712
1428764_at	maternally expressed 3	Meg3	0.0690185	2.29682
1455369_at	amyloid beta (A4) precursor protein binding, family A, member 1	Apba1	0.570055	2.29629
1422039_at	tumor necrosis factor receptor superfamily, member 22	Tnfrsf22	0.31608	2.29319
1429490_at	Rap1 interacting factor 1 homolog (yeast)	Rif1	0.535177	2.28938
1438598_at	SHC (Src homology 2 domain containing) transforming protein 2	Shc2	0.377926	2.28823
1457607_at	expressed sequence AW046457	AW046457	0.463042	2.28736
1446399_at	cadherin 10	Cdh10	0.605106	2.28708
1419625_at	heat shock protein 1-like	Hspa1l	0.505009	2.28671
1424581_at	SH3 and cysteine rich domain 2	Stac2	0.378559	2.28534
1451824_at	butyrophilin, subfamily 1, member A1	Btn1a1	0.269701	2.28476
1441812_at	uncharacterized LOC100503594	LOC100503594	0.439338	2.28337
1431116_at	transmembrane protein 200A	Tmem200a	0.086034	2.28154
1456975_at	TAO kinase 1	Taok1	0.274732	2.28003
1452965_at	ankyrin repeat domain 13 family, member D	Ankrd13d	0.429024	2.27534
1449688_at	Rho guanine nucleotide exchange factor (GEF) 25	Arhgef25	0.170825	2.27471
1456941_at	telomerase reverse transcriptase	Tert	0.155645	2.27426
1459881_at	fibrillarin-like 1	Fbll1	0.318412	2.27324
1454172_at	BCL6 co-repressor-like 1	Bcorl1	0.235125	2.26855
1420516_at	nonagouti	a	0.605154	2.26786
1459372_at	neuronal PAS domain protein 4	Npas4	0.35203	2.26691
1454305_at	chromobox 3 /// predicted pseudogene 5792 /// predicted gene 6901 /// predicted gene 6917 /// chromobox protein homolog 3-like	Cbx3 /// Gm5792 /// Gm6901 /// Gm6917 /// LOC100862604	0.3085	2.26613
1421727_at	eyes absent 1 homolog (Drosophila)	Eya1	0.297931	2.26486
1428355_at	oxysterol binding protein 2	Osbp2	0.320086	2.25934
1444027_at	solute carrier family 30 (zinc transporter), member 8	Slc30a8	0.367601	2.25736
1449802_x_at	RNA pseudouridylate synthase domain containing 2	Rpusd2	0.486998	2.25577
1442513_at	cDNA sequence BC016423	BC016423	0.387163	2.25379
1441603_at	somatostatin receptor 3	Sstr3	0.336623	2.25179
1450659_at	regulator of G protein signaling 7	Rgs7	0.316495	2.25169
1454719_at	rhomboid domain containing 3	Rhbdd3	0.419593	2.24569
1459003_at	four and a half LIM domains 1	Fhl1	0.145567	2.2432
1436057_at	maternally expressed 3	Meg3	0.389684	2.24297
1444766_at	ataxin 7-like 1	Atxn7l1	0.253179	2.24284
1445048_at	bromodomain adjacent to zinc finger domain, 2B	Baz2b	0.382599	2.24138
1456490_at	CDK2-associated protein 2	Cdk2ap2	0.297942	2.24118
1425757_a_at	interphotoreceptor matrix proteoglycan 1	Impg1	0.366546	2.23952
1420781_at	ectopic ossification 1	Etos1	0.257461	2.23905
1429752_x_at	CAP-GLY domain containing linker protein family, member 4	Clip4	0.326239	2.23827
1441309_at	a disintegrin-like and metallopeptidase (reprolysin type) with thrombospondin type 1 motif, 10	Adamts10	0.47614	2.23767
1441319_at	RNA binding motif protein 5	Rbm5	0.51866	2.23557
1460410_at	tRNA methyltransferase 44	Trmt44	0.630937	2.23404
1437757_at	histone H4 transcription factor	Hinfp	0.439926	2.23356
1448280_at	synaptophysin	Syp	0.528403	2.23347
1418531_at	oocyte secreted protein 1	Oosp1	0.615666	2.23202
1458198_at	mitogen-activated protein kinase kinase kinase 12	Map3k12	0.233744	2.23202
1430635_at	melan-A	Mlana	0.277825	2.23104
1422078_at	thymoma viral proto-oncogene 3	Akt3	0.318641	2.23084
1421582_a_at	cAMP responsive element binding protein 1	Creb1	0.439011	2.22767
1439258_at	activating transcription factor 4	Atf4	0.355178	2.22223
1456127_at	canopy 1 homolog (zebrafish)	Cnpy1	0.476288	2.22103
1429637_at	family with sequence similarity 198, member B	Fam198b	0.458729	2.21954
1448312_at	proprotein convertase subtilisin/kexin type 2	Pcsk2	0.235137	2.21896
1451607_at	kallikrein 1-related peptidase b21	Klk1b21	0.490522	2.21426
1456258_at	empty spiracles homeobox 2	Emx2	0.290522	2.21409
1435131_at	zinc finger protein 13	Zfp13	0.155975	2.21346
1434961_at	ankyrin repeat and SOCS box-containing 1	Asb1	0.545578	2.21243
1443954_at	RAD18 homolog (S. cerevisiae)	Rad18	0.669877	2.21133
1416588_at	protein tyrosine phosphatase, receptor type, N	Ptprn	0.427801	2.20788
1451682_at	zinc finger protein 142	Zfp142	0.373228	2.20597
1440910_at	expressed sequence C77370	C77370	0.341322	2.20511
1418687_at	activity regulated cytoskeletal-associated protein	Arc	0.444757	2.20489
1439777_at	CUGBP, Elav-like family member 2	Celf2	0.132322	2.20436
1419785_at	expressed sequence AA516738	AA516738	0.629573	2.20353
1436615_a_at	ornithine transcarbamylase	Otc	0.298588	2.20336
1429980_x_at	solute carrier family 38, member 10	Slc38a10 *	0.640912	2.20336
1418454_at	microfibrillar associated protein 5	Mfap5	0.562438	2.20144
1418464_at	matrilin 4	Matn4	0.248938	2.19983
1440905_at	heparan sulfate 2-O-sulfotransferase 1	Hs2st1	0.534708	2.19955
1430240_a_at	calmegin	Clgn	0.51958	2.19688
1428041_at	cDNA sequence BC028777	BC028777	0.522947	2.19564
1459584_at	charged multivesicular body protein 3	Chmp3	0.166014	2.19432
1422504_at	glycine receptor, beta subunit	Glrb	0.450882	2.19366
1440959_s_at	myoneurin	Mynn	0.52655	2.19364
1422628_at	family with sequence similarity 111, member A	Fam111a	0.595459	2.19074
1422151_at	GATS protein-like 2	Gatsl2	0.579329	2.19006
1458275_at	sel-1 suppressor of lin-12-like 3 (C. elegans)	Sel1l3	0.610232	2.18816
1442247_at	zinc finger protein 286	Zfp286	0.309906	2.18594
1421466_at	ankyrin repeat and SOCS box-containing 10	Asb10	0.2565	2.18591
1424530_at	SEC14-like 2 (S. cerevisiae)	Sec14l2	0.593064	2.18516
1425032_at	secretoglobin, family 2B, member 27	Scgb2b27	0.508545	2.18429
1455012_s_at	tripartite motif-containing 37	Trim37	0.354103	2.18169
1439591_at	unc-51 like kinase 2	Ulk2	0.595084	2.1805
1455404_at	junctophilin 2	Jph2	0.568332	2.1801
1454881_s_at	uroplakin 3B	Upk3b	0.520378	2.17943
1454234_at	Williams-Beuren syndrome chromosome region 28 (human)	Wbscr28	0.212836	2.17651
1458101_at	leucine rich repeat containing 56	Lrrc56	0.378236	2.17603
1441618_at	Rho GTPase activating protein 29	Arhgap29	0.183642	2.17508
1436265_at	predicted gene 10419	Gm10419	0.597064	2.1749
1422878_at	synaptotagmin XII	Syt12	0.403887	2.17403
1444404_at	ring finger protein 207	Rnf207	0.43303	2.1738
1442263_at	regulator of G-protein signaling 13	Rgs13	0.17209	2.17289
1445525_at	kinesin family member 14	Kif14	0.28729	2.17276
1457032_at	adenylate kinase 5	Ak5	0.579346	2.17159
1426792_s_at	RUN and SH3 domain containing 2	Rusc2	0.117206	2.17146
1456885_at	septin 8	42255	0.569355	2.16973
1422311_a_at	polymerase (RNA) II (DNA directed) polypeptide A	Polr2a	0.362626	2.16818
1449203_at	solute carrier organic anion transporter family, member 1a5	Slco1a5	0.152124	2.16749
1459891_at	expressed sequence C78444	C78444	0.503686	2.16673
1441607_at	expressed sequence AU015603	AU015603	0.34981	2.16578
1445330_at	protein disulfide isomerase associated 3	Pdia3	0.221037	2.16542
1423541_at	armadillo repeat containing 12	Armc12	0.61607	2.16476
1440270_at	fibroblast growth factor 12	Fgf12	0.415583	2.16464
1444870_at	expressed sequence AU015438	AU015438	0.28821	2.16435
1442511_at	importin 7	Ipo7	0.323291	2.16116
1447359_at	zinc finger protein 575	Zfp575	0.438374	2.15465
1449241_at	kelch-like 1	Klhl1	0.427881	2.15386
1423514_at	glycerol kinase-like 1	Gykl1	0.285671	2.15337
1430364_at	activating transcription factor 7 interacting protein 2	Atf7ip2	0.609294	2.15276
1431057_a_at	protease, serine, 23	Prss23	0.323083	2.15233
1429621_at	cullin-associated and neddylation-dissociated 2 (putative)	Cand2	0.629109	2.15203
1417030_at	transmembrane protein 206	Tmem206	0.392929	2.15023
1430303_at	coiled-coil domain containing 41	Ccdc41	0.482057	2.14971
1424471_at	Rap guanine nucleotide exchange factor (GEF) 3	Rapgef3	0.207667	2.14911
1445286_at	vomeronasal 2, receptor 29	Vmn2r29	0.526202	2.14909
1427286_at	RNA binding protein, fox-1 homolog (C. elegans) 3	Rbfox3	0.497307	2.14876
1453708_a_at	glutathione S-transferase omega 2	Gsto2	0.188504	2.14854
1445465_at	expressed sequence N28178	N28178	0.299133	2.14846
1442610_at	plexin domain containing 1	Plxdc1	0.637291	2.14789
1424303_at	DEP domain containing 7	Depdc7	0.589006	2.14691
1438060_at	neuronal PAS domain protein 3	Npas3	0.259435	2.14616
1450613_x_at	interferon alpha B	Ifnab	0.26125	2.14598
1422281_at	somatostatin receptor 4	Sstr4	0.46487	2.14535
1437213_at	nudix (nucleoside diphosphate linked moiety X)-type motif 21	Nudt21	0.38642	2.1452
1426168_a_at	T cell receptor alpha variable 9D-3	Trav9d-3	0.570331	2.13988
1446398_at	uncharacterized LOC433197	LOC433197	0.55747	2.1384
1434727_at	hepatocyte cell adhesion molecule	Hepacam	0.25763	2.13791
1429229_s_at	centrosomal protein 128	Cep128	0.246054	2.13725
1441070_at	predicted gene 15050	Gm15050	0.297991	2.13502
1445275_at	coiled-coil serine rich 1	Ccser1	0.42108	2.13476
1449730_s_at	frizzled homolog 3 (Drosophila)	Fzd3	0.510167	2.13276
1447769_x_at	adhesion molecule with Ig like domain 2	Amigo2	0.153919	2.13275
1437266_at	thioredoxin domain containing 2 (spermatozoa)	Txndc2	0.622549	2.13254
1421793_at	fibroblast growth factor 11	Fgf11	0.260565	2.13252
1450733_at	bicaudal D homolog 2 (Drosophila)	Bicd2	0.329625	2.13189
1442594_at	Ttk protein kinase	Ttk	0.303104	2.13073
1421316_at	late cornified envelope 1G	Lce1g	0.458086	2.1307
1436882_at	ubiquitin-like 5	Ubl5	0.454055	2.12976
1426902_at	coenzyme Q6 homolog (yeast)	Coq6	0.503103	2.1289
1418400_at	La ribonucleoprotein domain family, member 6	Larp6	0.206233	2.12883
1448408_at	Hermansky-Pudlak syndrome 1 homolog (human)	Hps1	0.449838	2.12808
1423777_at	ubiquitin specific peptidase 20	Usp20	0.613875	2.12673
1446831_at	DNA segment, Chr 5, ERATO Doi 521, expressed	D5Ertd521e	0.29531	2.12266
1456863_at	Eph receptor A4	Epha4	0.433295	2.12162
1454053_at	solute carrier family 9 (sodium/hydrogen exchanger), member 9	Slc9a9	0.555001	2.11968
1452068_at	N-acylethanolamine acid amidase	Naaa	0.410291	2.11957
1456709_at	oligophrenin 1	Ophn1	0.355923	2.11764
1425447_at	dickkopf homolog 4 (Xenopus laevis)	Dkk4	0.123899	2.11526
1434119_at	DNA segment, Chr 2, Wayne State University 81, expressed	D2Wsu81e	0.386619	2.11405
1458694_at	kinesin family member 16B	Kif16b	0.343452	2.11255
1440767_at	defensin beta 41	Defb41	0.064963	2.11197
1454372_at	CD80 antigen	Cd80	0.25039	2.11072
1457511_at	regulator of G-protein signaling 12	Rgs12	0.519884	2.10679
1427307_a_at	disabled 1	Dab1	0.631991	2.10631
1440045_at	crystallin, zeta (quinone reductase)-like 1	Cryzl1	0.185861	2.10486
1434592_at	solute carrier family 16 (monocarboxylic acid transporters), member 10	Slc16a10 ]	0.225489	2.10301
1428641_at	heat shock transcription factor 2 binding protein	Hsf2bp	0.189107	2.10037
1450270_at	protocadherin beta 11	Pcdhb11	0.305973	2.09942
1440105_at	lysine (K)-specific demethylase 4D	Kdm4d	0.261419	2.09862
1453026_at	family with sequence similarity 166, member A	Fam166a	0.582594	2.09455
1449065_at	acyl-CoA thioesterase 1	Acot1	0.641513	2.09435
1440945_at	glucocorticoid induced transcript 1	Glcci1	0.406594	2.09383
1453265_at	equatorin, sperm acrosome associated	Eqtn	0.594133	2.09373
1457309_at	expressed sequence AU015228	AU015228	0.27306	2.09256
1455473_at	ubiquitin specific peptidase 13 (isopeptidase T-3)	Usp13	0.416353	2.09074
1422938_at	B cell leukemia/lymphoma 2	Bcl2	0.628359	2.09047
1432679_at	integrin alpha V	Itgav	0.482787	2.08866
1448723_at	retinol dehydrogenase 7	Rdh7	0.161377	2.08526
1454632_at	transmembrane protein 229B	Tmem229b	0.497531	2.08442
1438782_at	contactin 4	Cntn4	0.220342	2.08432
1445371_at	transmembrane protein 207	Tmem207	0.644133	2.0837
1459873_x_at	melanoma antigen, family D, 2	Maged2	0.309031	2.08245
1452481_at	phospholipase C, beta 2	Plcb2	0.338617	2.08232
1419007_at	zona pellucida glycoprotein 3	Zp3	0.235982	2.08223
1416437_a_at	mitogen-activated protein kinase 8 interacting protein 3	Mapk8ip3	0.659162	2.08214
1435108_at	Rho GTPase activating protein 22	Arhgap22	0.192088	2.08208
1431834_a_at	elastin microfibril interfacer 1	Emilin1	0.497418	2.08101
1420188_at	synaptotagmin VI	Syt6	0.261779	2.07592
1425400_a_at	Cbp/p300-interacting transactivator, with Glu/Asp-rich carboxy-terminal domain, 4	Cited4	0.649159	2.07552
1421920_a_at	chemokine (C-C motif) receptor 9	Ccr9	0.201203	2.07307
1433693_x_at	vesicle-associated membrane protein 3	Vamp3	0.370742	2.07282
1422839_at	neurogenin 2	Neurog2	0.640157	2.0724
1438073_at	sprouty homolog 3 (Drosophila)	Spry3	0.618378	2.0697
1440642_at	ssu-2 homolog (C. elegans)	Ssu2	0.606711	2.06902
1427126_at	heat shock protein 1B	Hspa1b	0.354306	2.06822
1452589_at	PTK7 protein tyrosine kinase 7	Ptk7	0.449301	2.06815
1441035_at	potassium voltage-gated channel, Isk-related subfamily, member 1	Kcne1	0.338646	2.06806
1427340_at	regulator of G-protein signaling 6	Rgs6	0.358434	2.06706
1417751_at	serine/threonine kinase 10	Stk10	0.578112	2.06509
1442736_at	kelch-like 11	Klhl11	0.222894	2.06307
1454209_at	family with sequence similarity 57, member B	Fam57b	0.603129	2.06303
1451615_at	carboxylesterase 4A	Ces4a	0.44677	2.06126
1427767_a_at	cystic fibrosis transmembrane conductance regulator	Cftr	0.631577	2.05639
1427380_at	kallikrein 1-related peptidase b3	Klk1b3	0.246179	2.05528
1419409_at	late cornified envelope 1B	Lce1b	0.320226	2.05359
1440901_at	diacylglycerol kinase, beta	Dgkb	0.599623	2.05294
1449823_at	dachshund 2 (Drosophila)	Dach2	0.109063	2.0521
1431864_at	F-box protein 24	Fbxo24	0.650889	2.05075
1417523_at	pleckstrin	Plek	0.582328	2.05056
1440278_at	dynein light chain LC8-type 1	Dynll1	0.648525	2.05044
1431887_at	predicted gene, 21379 /// RNA binding motif 31, Y-linked	Gm21379 /// Rbm31y	0.192697	2.04951
1419300_at	FMS-like tyrosine kinase 1	Flt1	0.494185	2.04697
1421756_a_at	G protein-coupled receptor 19	Gpr19	0.445784	2.0466
1457680_a_at	transmembrane protein 69	Tmem69	0.494007	2.04611
1451952_at	prokineticin 2	Prok2	0.168934	2.04587
1454235_a_at	inhibitor of growth family, member 5	Ing5	0.410871	2.04575
1457228_x_at	GLE1 RNA export mediator (yeast)	Gle1	0.211273	2.04459
1442576_at	cAMP responsive element binding protein 5	Creb5	0.308389	2.04417
1458786_at	expressed sequence C79250	C79250	0.561295	2.04298
1443772_at	DAZ interacting protein 1	Dzip1	0.228995	2.04158
1445241_at	RAB11 family interacting protein 4 (class II)	Rab11fip4	0.570829	2.04126
1459725_s_at	demilune cell and parotid protein 1 /// demilune cell and parotid protein 2 /// demilune cell and parotid protein 3	Dcpp1 /// Dcpp2 /// Dcpp3	0.622293	2.04009
1453857_at	ring finger protein 180	Rnf180	0.646983	2.03989
1436474_at	C-type lectin domain family 18, member A	Clec18a	0.570415	2.03672
1430892_at	testis expressed 37	Tex37	0.529098	2.03618
1422143_at	A kinase (PRKA) anchor protein 7	Akap7	0.20929	2.03558
1454292_at	germ cell-less homolog 1 (Drosophila)	Gmcl1	0.376119	2.03407
1442526_at	expressed sequence C77681	C77681	0.119628	2.03274
1449965_at	mast cell protease 8	Mcpt8	0.574147	2.03179
1449529_s_at	prolactin family 7, subfamily a, member 1	Prl7a1	0.0892888	2.03035
1438296_at	Slc2a4 regulator, pseudogene	Slc2a4rg-ps	0.479591	2.02921
1451843_a_at	glycoprotein galactosyltransferase alpha 1, 3	Ggta1	0.638559	2.02813
1419992_x_at	RAB3A interacting protein (rabin3)-like 1	Rab3il1	0.239256	2.02746
1445536_at	expressed sequence AW061096	AW061096	0.541525	2.02654
1435067_at	RAB, member of RAS oncogene family-like 6	Rabl6	0.414675	2.02654
1427766_at	T cell receptor alpha variable 9D-3	Trav9d-3	0.0740741	2.02423
1425107_a_at	leukemia inhibitory factor receptor	Lifr	0.107702	2.0236
1442183_at	carnitine deficiency-associated gene expressed in ventricle 3 pseudogene	Gm13238	0.626151	2.02186
1422611_s_at	insulin-like growth factor 2 mRNA binding protein 3	Igf2bp3	0.377106	2.02123
1449308_at	complement component 6	C6	0.231821	2.01906
1420713_a_at	MyoD family inhibitor	Mdfi	0.0814433	2.01807
1450856_at	armadillo repeat gene deleted in velo-cardio-facial syndrome	Arvcf	0.56542	2.018
1436865_at	solute carrier family 26, member 11	Slc26a11	0.379304	2.01783
1421401_at	potassium large conductance calcium-activated channel, subfamily M, beta member 1	Kcnmb1	0.0362631	2.0174
1436560_at	kinesin family member 3A	Kif3a	0.406286	2.01638
1443441_x_at	predicted gene 5141	Gm5141	0.538578	2.0131
1427320_at	coatomer protein complex, subunit gamma 2, antisense 2	Copg2as2	0.458996	2.01181
1437441_at	expressed sequence AA388235	AA388235	0.551935	2.00743
1437030_at	phospholipase C, delta 4	Plcd4	0.593964	2.00579
1418270_at	a disintegrin-like and metallopeptidase (reprolysin type) with thrombospondin type 1 motif, 8	Adamts8	0.281656	2.00573
1442583_a_at	expressed sequence AI854703	AI854703	0.264588	2.00567
1453370_at	trophinin associated protein	Troap	0.396692	2.00463
1427821_at	coatomer protein complex, subunit gamma 2, antisense 2	Copg2as2	0.653092	2.00415
1449770_x_at	transmembrane protein 191C	Tmem191c	0.409145	2.00143
1459383_at	zinc finger protein 948	Zfp948	0.236514	2.00016
1442167_at	cytoplasmic FMR1 interacting protein 2	Cyfip2	0.474956	1.99953
1441504_at	RNA binding motif protein 44	Rbm44	0.662516	1.99648
1443119_at	glutamate receptor, metabotropic 7	Grm7	0.0928604	1.99357
1425002_at	secreted and transmembrane 1A	Sectm1a	0.595105	1.99349
1439250_at	SLIT and NTRK-like family, member 3	Slitrk3	0.527136	1.99079
1430511_at	unc-13 homolog C (C. elegans)	Unc13c	0.64308	1.98999
1434308_at	solute carrier family 43, member 2	Slc43a2	0.61106	1.98802
1419005_at	crystallin, beta B3	Crybb3	0.616751	1.98739
1426072_at	chemokine-like receptor 1	Cmklr1	0.205837	1.98489
1427566_at	WAP, FS, Ig, KU, and NTR-containing protein 1	Wfikkn1	0.353182	1.98434
1425116_a_at	spectrin beta, non-erythrocytic 4	Sptbn4	0.105257	1.98428
1421470_at	gastrin releasing peptide receptor	Grpr	0.478751	1.98386
1438523_x_at	serine/arginine repetitive matrix 4	Srrm4	0.592737	1.98293
1429143_at	tektin 3	Tekt3	0.512318	1.98282
1431162_a_at	enabled homolog (Drosophila)	Enah	0.436294	1.98269
1435726_at	LIM domain and actin binding 1	Lima1	0.624124	1.98251
1449458_at	forkhead box I1	Foxi1	0.382776	1.982
1426116_at	ankyrin repeat and SOCS box-containing 18	Asb18	0.150445	1.98167
1429841_at	multiple EGF-like-domains 10	Megf10	0.070693	1.98073
1451546_s_at	transmembrane protein 40	Tmem40	0.184289	1.97923
1429443_at	copine IV	Cpne4	0.632193	1.97852
1456269_at	preferentially expressed antigen in melanoma like 6	Pramel6	0.235397	1.97808
1431933_a_at	DCP1 decapping enzyme homolog A (S. cerevisiae)	Dcp1a	0.211305	1.97713
1431909_at	zinc finger CCCH type, antiviral 1	Zc3hav1	0.550781	1.97711
1446188_at	centrosomal protein 97	Cep97	0.429926	1.97685
1460508_at	mitochondrial ribosomal protein L1	Mrpl1	0.597418	1.97468
1445880_at	uncharacterized LOC101056642	LOC101056642	0.272863	1.97435
1444035_at	mesoderm development candidate 2	Mesdc2	0.575872	1.97209
1419661_at	Yae1 domain containing 1	Yae1d1	0.61444	1.97006
1429935_at	lipocalin 12	Lcn12	0.397759	1.96943
1420708_at	TRAF-interacting protein	Traip	0.176829	1.9694
1459448_at	cytochrome b5 reductase 2	Cyb5r2	0.158971	1.96902
1445050_at	expressed sequence AU015247	AU015247	0.251177	1.96892
1438833_at	cancer susceptibility candidate 5	Casc5	0.297823	1.9674
1426178_at	immunoglobulin kappa chain complex	Igk	0.421156	1.96732
1420816_at	tyrosine 3-monooxygenase/tryptophan 5-monooxygenase activation protein, gamma polypeptide	Ywhag	0.303391	1.96663
1436927_at	cysteine-rich perinuclear theca 10 /// cysteine-rich perinuclear theca 4 /// cysteine-rich perinuclear theca 9	Cypt10 /// Cypt4 /// Cypt9	0.643125	1.96635
1454911_at	F-box and WD-40 domain protein 24	Fbxw24	0.520663	1.96408
1422050_at	NK1 transcription factor related, locus 2 (Drosophila)	Nkx1-2	0.652586	1.9638
1439648_at	anillin, actin binding protein	Anln	0.333881	1.96279
1424817_at	sperm flagellar 1	Spef1	0.427761	1.96172
1454577_at	cell division cycle 20B	Cdc20b	0.428835	1.96103
1425885_a_at	potassium voltage-gated channel, shaker-related subfamily, beta member 2	Kcnab2	0.119386	1.96085
1447938_at	predicted gene 10590 /// predicted gene 2192	Gm10590 /// Gm2192	0.524704	1.96047
1437786_at	N(alpha)-acetyltransferase 11, NatA catalytic subunit	Naa11	0.636021	1.96042
1416504_at	unc-51 like kinase 1	Ulk1	0.559855	1.96004
1440413_at	von Willebrand factor C domain-containing protein 2-like	Vwc2l	0.185299	1.95883
1421312_a_at	kinesin family member C2	Kifc2	0.276985	1.9587
1447246_at	predicted gene 9873	Gm9873	0.40728	1.95834
1427796_at	zinc finger protein pseudogene	LOC171588	0.136577	1.9582
1447954_at	leucine rich repeat containing 49	Lrrc49	0.195356	1.95675
1428541_at	family with sequence similarity 115, member A	Fam115a	0.48535	1.95652
1421714_at	transmembrane protease, serine 3	Tmprss3	0.123556	1.9548
1454132_at	transmembrane protein with EGF-like and two follistatin-like domains 2	Tmeff2	0.367724	1.95381
1443587_at	tetratricopeptide repeat domain 37	Ttc37	0.334929	1.95326
1438903_at	macrophage erythroblast attacher	Maea	0.222916	1.95271
1440513_at	expressed sequence C80258	C80258	0.297048	1.9522
1424403_a_at	RUN and FYVE domain containing 3	Rufy3	0.564059	1.95138
1458737_at	expressed sequence C77097	C77097	0.304412	1.94974
1450946_at	neural retina leucine zipper gene	Nrl	0.24477	1.94967
1456811_at	CXXC finger 4	Cxxc4	0.555572	1.94858
1418589_a_at	myeloid leukemia factor 1	Mlf1	0.488082	1.94511
1437103_at	insulin-like growth factor 2 mRNA binding protein 2	Igf2bp2	0.667489	1.94488
1417572_at	N-methylpurine-DNA glycosylase	Mpg	0.623003	1.94107
1422944_a_at	diaphanous homolog 3 (Drosophila)	Diap3	0.597986	1.941
1425235_s_at	collagen, type XX, alpha 1	Col20a1	0.207549	1.93964
1440256_at	regulator of G-protein signalling 9 binding protein	Rgs9bp	0.437334	1.93878
1432560_at	kallikrein 1-related peptidase b7, pseudogene	Klk1b7-ps	0.155695	1.93861
1430588_at	maestro	Mro	0.34953	1.93741
1427603_at	activating transcription factor 7 interacting protein 2	Atf7ip2	0.600274	1.93609
1420740_at	interleukin 25	Il25	0.295978	1.93575
1455835_at	ribosomal protein S16	Rps16	0.580873	1.93557
1431833_a_at	3-hydroxy-3-methylglutaryl-Coenzyme A synthase 2	Hmgcs2	0.459578	1.93464
1459839_x_at	BTB (POZ) domain containing 11	Btbd11	0.307685	1.93438
1438453_at	RAD51 homolog C	Rad51c	0.661126	1.93428
1455148_at	transmembrane protein 130	Tmem130	0.189917	1.93365
1419827_s_at	kinesin family member 17	Kif17	0.660024	1.9237
1435158_at	RNA binding motif protein 12 B1	Rbm12b1	0.597726	1.9229
1438056_x_at	ATP-binding cassette, sub-family C (CFTR/MRP), member 5	Abcc5	0.590959	1.92263
1435575_at	kinetochore associated 1	Kntc1	0.485499	1.92158
1439738_at	methyltransferase like 13	Mettl13	0.351712	1.92068
1443307_at	proteasome (prosome, macropain) 26S subunit, ATPase 2	Psmc2	0.477216	1.91939
1445473_at	DIRAS family, GTP-binding RAS-like 2	Diras2	0.415876	1.91917
1441032_at	predicted gene 14168	Gm14168	0.390674	1.91737
1445273_at	DNA segment, Chr 10, ERATO Doi 638, expressed	D10Ertd638e	0.632527	1.91703
1421158_at	cingulin-like 1	Cgnl1	0.479655	1.91584
1432556_a_at	family with sequence similarity 183, member B	Fam183b	0.411962	1.91552
1427127_x_at	heat shock protein 1B	Hspa1b	0.447035	1.91449
1420968_at	nucleus accumbens associated 1, BEN and BTB (POZ) domain containing	Nacc1	0.56671	1.91296
1419117_at	solute carrier family 22 (organic cation transporter), member 2	Slc22a2	0.25735	1.9113
1429016_at	ankyrin repeat and zinc finger domain containing 1 /// galactosidase, beta 1-like	Ankzf1 /// Glb1l	0.452102	1.91119
1436910_at	RAS protein activator like 2	Rasal2	0.115567	1.91113
1432820_at	proteasome (prosome, macropain) 26S subunit, non-ATPase, 7	Psmd7	0.479802	1.91084
1426003_at	neurotrophic tyrosine kinase, receptor, type 3	Ntrk3	0.598962	1.91027
1417459_at	demilune cell and parotid protein 1	Dcpp1	0.509753	1.90982
1453279_x_at	keratin 76	Krt76	0.476381	1.90888
1436091_at	spermatogenesis associated, serine-rich 2-like	Spats2l	0.570816	1.90632
1448861_at	TNF receptor-associated factor 5	Traf5	0.424438	1.90625
1429591_at	transforming, acidic coiled-coil containing protein 1	Tacc1	0.56731	1.90535
1458189_at	collagen, type XXVI, alpha 1	Col26a1	0.420557	1.90461
1451181_at	transmembrane protein 121	Tmem121	0.643197	1.9034
1446008_at	DNA segment, Chr 3, ERATO Doi 246, expressed	D3Ertd246e	0.382166	1.90311
1438854_x_at	phosphatidylinositol transfer protein, membrane-associated 1	Pitpnm1	0.437502	1.90216
1456984_at	sex comb on midleg-like 2 (Drosophila)	Scml2	0.296607	1.90205
1419231_s_at	keratin 12	Krt12	0.610492	1.90161
1432140_at	gasdermin A2	Gsdma2	0.423645	1.90037
1459952_at	ankyrin repeat domain 17	Ankrd17	0.420483	1.89926
1425679_a_at	mitogen-activated protein kinase 8 interacting protein 1	Mapk8ip1	0.0839539	1.89875
1435728_at	tRNA-yW synthesizing protein 3 homolog (S. cerevisiae)	Tyw3	0.663071	1.89768
1455630_at	dynein, axonemal, light chain 1	Dnal1	0.328334	1.89654
1454780_at	UDP-N-acetyl-alpha-D-galactosamine:polypeptide N-acetylgalactosaminyltransferase 18	Galnt18	0.485091	1.89612
1429760_at	ribosomal protein S6 kinase polypeptide 6	Rps6ka6	0.540673	1.89146
1453962_at	profilin 3	Pfn3	0.333842	1.89088
1444172_at	predicted gene, 19451	Gm19451	0.377928	1.89053
1430227_at	actin-like 10	Actl10	0.543228	1.89036
1459119_at	centromere protein O	Cenpo	0.470319	1.88891
1429279_at	tryptophanyl tRNA synthetase 2 (mitochondrial)	Wars2	0.637248	1.88686
1436932_at	grainyhead-like 3 (Drosophila)	Grhl3	0.469548	1.88605
1440949_at	predicted gene 15471	Gm15471	0.522173	1.88485
1448983_at	CMT1A duplicated region transcript 4	Cdrt4	0.302238	1.88457
1440568_at	protection of telomeres 1A	Pot1a	0.365196	1.88449
1432170_at	Ts translation elongation factor, mitochondrial	Tsfm	0.119513	1.88258
1434136_at	transmembrane protein 229A	Tmem229a	0.315425	1.88036
1448675_at	ankyrin repeat and zinc finger domain containing 1	Ankzf1	0.548165	1.88006
1455379_at	dynein, axonemal, light intermediate polypeptide 1	Dnali1	0.0667815	1.87931
1417939_at	RAD51 associated protein 1	Rad51ap1	0.339066	1.87893
1439026_at	transient receptor potential cation channel, subfamily M, member 3	Trpm3	0.396704	1.87849
1432022_at	Rho GTPase activating protein 31	Arhgap31	0.410273	1.87799
1453136_at	F-box protein 30	Fbxo30	0.344446	1.87754
1447739_x_at	kelch domain containing 4	Klhdc4	0.61399	1.8773
1455673_at	alkB, alkylation repair homolog 2 (E. coli)	Alkbh2	0.549682	1.87677
1455313_at	actin-binding LIM protein 2	Ablim2	0.560323	1.8766
1453996_a_at	cathepsin 3	Cts3	0.451605	1.87546
1427958_at	abhydrolase domain containing 10	Abhd10	0.319823	1.87464
1420278_at	protease, serine 58	Prss58	0.385724	1.87382
1427754_a_at	dynamin 1	Dnm1	0.239595	1.87356
1455044_at	transmembrane protein 44	Tmem44	0.442446	1.87296
1438287_x_at	DEAD (Asp-Glu-Ala-Asp) box polypeptide 39	Ddx39	0.502428	1.87212
1426172_a_at	CD209a antigen	Cd209a	0.495668	1.86972
1418165_at	intelectin 1 (galactofuranose binding) /// intelectin b	Itln1 /// Itlnb	0.0968019	1.86907
1457459_at	expressed sequence AU014973	AU014973	0.452807	1.86854
1425150_at	acyl-coenzyme A amino acid N-acyltransferase 2	Acnat2	0.408255	1.86758
1436277_at	ring finger protein 207	Rnf207	0.132779	1.86598
1428610_at	autophagy related 7	Atg7	0.407756	1.86529
1434789_at	DEP domain containing 1B	Depdc1b	0.388512	1.86516
1435098_at	expressed sequence AA474331	AA474331	0.544083	1.86516
1427597_at	pleckstrin homology domain containing, family H (with MyTH4 domain) member 2	Plekhh2	0.0904559	1.8641
1431438_at	SH2B adaptor protein 1	Sh2b1	0.13882	1.86377
1421546_a_at	Rac GTPase-activating protein 1	Racgap1	0.500537	1.86272
1429802_at	hydroxysteroid (17-beta) dehydrogenase 14	Hsd17b14	0.250651	1.86267
1459197_at	contactin 1	Cntn1	0.349749	1.86072
1456100_at	cDNA sequence BC089491	BC089491	0.282094	1.86063
1427571_at	sonic hedgehog	Shh	0.489718	1.8601
1458932_at	peroxisomal biogenesis factor 5-like	Pex5l	0.663334	1.85949
1432361_a_at	centromere protein P	Cenpp	0.506506	1.85906
1419282_at	chemokine (C-C motif) ligand 12 /// c-C motif chemokine 12-like	Ccl12 /// LOC100862578	0.62788	1.85826
1435321_at	LIM and calponin homology domains 1	Limch1	0.206711	1.85699
1422975_at	membrane metallo endopeptidase	Mme	0.505558	1.85635
1434800_at	synaptic vesicle glycoprotein 2 b	Sv2b	0.379857	1.85634
1423009_at	secretory blood group 1	Sec1	0.526071	1.85525
1431210_at	ATP/GTP binding protein-like 3	Agbl3	0.352653	1.85301
1440766_at	glycosyltransferase 8 domain containing 1	Glt8d1	0.59275	1.85283
1426066_a_at	dystrobrevin alpha	Dtna	0.381298	1.85267
1449919_at	keratin associated protein 6-2	Krtap6-2	0.534202	1.85173
1442731_at	PDS5, regulator of cohesion maintenance, homolog A (S. cerevisiae)	Pds5a	0.228857	1.85161
1436605_at	transketolase	Tkt	0.584593	1.85079
1451414_at	NOP16 nucleolar protein	Nop16	0.4378	1.85065
1458356_at	predicted gene 20484	Gm20484	0.297191	1.85026
1444058_at	DAZ interacting protein 3, zinc finger	Dzip3	0.590269	1.84926
1437877_at	tetratricopeptide repeat domain 14	Ttc14	0.605793	1.84731
1443022_at	tectonic family member 3	Tctn3	0.265449	1.84567
1439085_at	ELM2 and Myb/SANT-like domain containing 1	Elmsan1	0.61539	1.8443
1435920_x_at	ATPase, Na+/K+ transporting, alpha 1 polypeptide	Atp1a1	0.616318	1.84183
1449814_at	frequently rearranged in advanced T cell lymphomas	Frat1	0.620735	1.84183
1417705_at	OTU domain, ubiquitin aldehyde binding 1	Otub1	0.616658	1.84154
1444259_at	expressed sequence AW495222	AW495222	0.582391	1.84147
1440569_at	solute carrier family 16 (monocarboxylic acid transporters), member 10	Slc16a10	0.274064	1.84066
1430081_at	PHD finger protein 15	Phf15	0.467695	1.84054
1450993_at	PAS domain containing serine/threonine kinase	Pask	0.454353	1.84053
1455679_at	nucleic acid binding protein 1	Nabp1	0.586195	1.84009
1432219_at	nucleolar protein 9	Nol9	0.5852	1.83832
1437397_at	prolactin receptor	Prlr	0.556309	1.83759
1434780_at	microtubule associated tumor suppressor candidate 2	Mtus2	0.146698	1.83749
1447775_x_at	zinc finger protein 622	Zfp622	0.441149	1.83681
1419312_at	ATPase, Ca++ transporting, cardiac muscle, fast twitch 1	Atp2a1	0.091818	1.83474
1420120_at	PHD finger protein 3	Phf3	0.504025	1.83418
1444501_at	expressed sequence AI462521	AI462521	0.361677	1.83223
1433499_at	upregulator of cell proliferation	Urgcp	0.531163	1.83193
1447233_at	proline-rich transmembrane protein 4	Prrt4	0.584076	1.83101
1428816_a_at	GATA binding protein 2	Gata2	0.133451	1.8309
1435502_a_at	bromodomain, testis-specific	Brdt	0.263269	1.83073
1418060_a_at	mitogen-activated protein kinase 7	Mapk7	0.343668	1.83056
1424799_a_at	golgi coiled coil 1	Gcc1	0.0862975	1.83038
1442562_at	zinc finger protein 827	Zfp827	0.297877	1.82992
1417915_at	RAP2B, member of RAS oncogene family	Rap2b	0.662343	1.82967
1456786_at	LIM domain binding 2	Ldb2	0.157453	1.82929
1450230_at	von Willebrand factor A domain containing 7	Vwa7	0.542889	1.82867
1443116_at	proteasome (prosome, macropain) activator subunit 4	Psme4	0.41305	1.82829
1445911_at	cysteine-rich hydrophobic domain 2	Chic2	0.662494	1.82769
1447956_at	expressed sequence C76614	C76614	0.534338	1.8274
1427529_at	frizzled homolog 9 (Drosophila)	Fzd9	0.44514	1.8271
1447190_at	predicted gene 14198	Gm14198	0.579867	1.82645
1456486_at	zinc finger protein 574	Zfp574	0.326557	1.82585
1427681_s_at	vomeronasal 2, receptor 88	Vmn2r88	0.108188	1.82558
1439377_x_at	cell division cycle 20	Cdc20	0.415499	1.82498
1436218_at	leucine-rich repeat-containing G protein-coupled receptor 6	Lgr6	0.573074	1.8233
1426431_at	jagged 2	Jag2	0.441874	1.82189
1440175_at	epsin 2	Epn2	0.0454701	1.82136
1455785_at	potassium voltage-gated channel, shaker-related subfamily, member 1	Kcna1	0.393659	1.82119
1430617_at	Opa interacting protein 5	Oip5	0.561221	1.82099
1419012_at	zinc finger protein, multitype 2	Zfpm2	0.510017	1.81806
1440406_at	G patch domain containing 3	Gpatch3	0.26392	1.81748
1422007_at	aquaporin 3	Aqp3	0.468634	1.81719
1425397_at	predicted gene 9885	Gm9885	0.433885	1.81642
1427832_at	tubulin alpha, related sequence 1	Tuba-rs1	0.495338	1.8164
1431808_a_at	inter alpha-trypsin inhibitor, heavy chain 4	Itih4	0.172407	1.81596
1416999_at	sphingomyelin phosphodiesterase 2, neutral	Smpd2	0.604642	1.81471
1424475_at	calcium/calmodulin-dependent protein kinase kinase 2, beta	Camkk2	0.410633	1.81337
1458334_at	wingless-related MMTV integration site 7A	Wnt7a	0.644949	1.81219
1421783_a_at	Kv channel-interacting protein 2	Kcnip2	0.369277	1.81198
1431159_at	O-acetyl-ADP-ribose deacetylase MACROD2-like /// MACRO domain containing 2	LOC101056500 /// Macrod2	0.466442	1.81186
1420743_a_at	protein phosphatase 3, catalytic subunit, gamma isoform	Ppp3cc	0.646517	1.81159
1432442_at	synaptonemal complex central element protein 1 like	Syce1l	0.362355	1.81046
1426321_at	T-box 4	Tbx4	0.0339415	1.80833
1434425_at	trichohyalin	Tchh	0.350101	1.80826
1453820_at	cDNA sequence BC065403	BC065403	0.213376	1.80774
1442119_at	expressed sequence AI449212	AI449212	0.548297	1.80754
1453982_at	transformed mouse 3T3 cell double minute 4	Mdm4	0.395486	1.80637
1438768_at	predicted gene 7544	Gm7544	0.460122	1.80632
1422674_s_at	crystallin, gamma B /// crystallin, gamma C	Crygb /// Crygc	0.268333	1.80571
1459454_at	predicted gene 11721	Gm11721	0.427976	1.80479
1454802_x_at	ariadne homolog 2 (Drosophila)	Arih2	0.334743	1.80429
1426107_at	PR domain containing 9	Prdm9	0.52879	1.80372
1447289_at	expressed sequence AA763521	AA763521	0.608688	1.80355
1422228_at	wingless-related MMTV integration site 8A	Wnt8a	0.431315	1.80319
1418109_at	G1 to S phase transition 2	Gspt2	0.455259	1.80294
1444520_at	furry homolog-like (Drosophila)	Fryl	0.229028	1.80272
1427810_at	thymidylate synthase	Tyms	0.300874	1.80206
1431985_at	zinc finger protein 846	Zfp846	0.572434	1.80093
1450863_a_at	doublecortin-like kinase 1	Dclk1	0.377046	1.79927
1427481_a_at	ATPase, Na+/K+ transporting, alpha 3 polypeptide	Atp1a3	0.40451	1.79923
1456287_at	expressed sequence BB236558	BB236558	0.285334	1.79872
1451506_at	myocyte enhancer factor 2C	Mef2c	0.109127	1.79872
1460546_at	leucine-rich repeat LGI family, member 3	Lgi3	0.25181	1.79822
1442934_at	expressed sequence C81608	C81608	0.113599	1.79817
1445131_at	F-box and leucine-rich repeat protein 13	Fbxl13	0.476358	1.7963
1423359_at	phospholamban	Pln	0.147535	1.79598
1450222_x_at	kallikrein 1-related pepidase b4	Klk1b4	0.354876	1.79492
1458959_at	AF4/FMR2 family, member 4	Aff4	0.626641	1.79467
1442565_at	protocadherin 10	Pcdh10	0.0812858	1.79382
1457283_at	neuregulin 2	Nrg2	0.247211	1.79318
1422550_a_at	microtubule-associated protein 6	Map6	0.543974	1.79188
1429448_s_at	tet methylcytosine dioxygenase 1	Tet1	0.280167	1.79147
1442092_at	Fanconi anemia, complementation group D2	Fancd2	0.335665	1.79133
1430427_a_at	protocadherin 18	Pcdh18	0.361107	1.79092
1418663_at	multiple PDZ domain protein	Mpdz	0.22836	1.78954
1426126_a_at	IGF-like family receptor 1 /// U2 small nuclear RNA auxiliary factor 1-like 4	Igflr1 /// U2af1l4	0.328555	1.78846
1451167_at	coiled-coil domain containing 101	Ccdc101	0.620742	1.7879
1431754_at	coiled-coil domain containing 173	Ccdc173	0.483099	1.78735
1446902_at	expressed sequence AU022538	AU022538	0.53193	1.7873
1421712_at	selectin, endothelial cell	Sele	0.454601	1.78646
1445037_at	G protein-coupled receptor kinase-interactor 2	Git2	0.463009	1.78584
1453906_at	mediator complex subunit 13-like	Med13l	0.352253	1.78425
1427858_at	immunoglobulin kappa chain variable 21 (V21)	Igk-V21	0.0673121	1.78345
1434554_at	tripartite motif-containing 37	Trim37	0.474825	1.78327
1418728_at	steroidogenic acute regulatory protein	Star	0.618362	1.78214
1434512_x_at	serine/arginine-rich splicing factor 3	Srsf3	0.481167	1.78095
1454827_at	pogo transposable element with ZNF domain	Pogz	0.353997	1.77606
1453129_a_at	regulator of G-protein signaling 12	Rgs12	0.564213	1.77574
1451872_a_at	neuralized homolog 1A (Drosophila)	Neurl1a	0.519196	1.77278
1427860_at	immunoglobulin kappa variable 6-14	Igkv6-14	0.620946	1.77246
1450159_at	rad and gem related GTP binding protein 1	Rem1	0.545277	1.77223
1427756_x_at	immunoglobulin heavy constant mu	Ighm	0.538268	1.77187
1425259_x_at	killer cell lectin-like receptor subfamily A, member 12	Klra12	0.176153	1.77089
1417335_at	sulfotransferase family, cytosolic, 2B, member 1	Sult2b1	0.519647	1.7697
1419081_at	autophagy related 10	Atg10	0.265361	1.76932
1425335_at	CD8 antigen, alpha chain	Cd8a	0.388455	1.76841
1423693_at	chymotrypsin-like elastase family, member 1	Cela1	0.631461	1.7679
1419332_at	EGF-like-domain, multiple 6	Egfl6	0.440319	1.76769
1459186_at	expressed sequence C80165	C80165	0.375911	1.76745
1427579_at	rhomboid, veinlet-like 3 (Drosophila)	Rhbdl3	0.138387	1.76669
1433743_at	dachshund 1 (Drosophila)	Dach1	0.635682	1.76618
1427662_at	cDNA sequence BC025933	BC025933	0.54765	1.76594
1452450_at	ATPase, class I, type 8B, member 2	Atp8b2	0.377335	1.76489
1419691_at	cathelicidin antimicrobial peptide	Camp	0.408336	1.76381
1430811_a_at	NUF2, NDC80 kinetochore complex component, homolog (S. cerevisiae)	Nuf2	0.510649	1.76369
1432174_a_at	solute carrier family 9, subfamily B (NHA1, cation proton antiporter 1), member 1	Slc9b1	0.668955	1.76352
1455873_a_at	vacuolar protein sorting 18 (yeast)	Vps18	0.524201	1.76341
1455297_at	spindlin family, member 2	Spin2	0.533618	1.76127
1430334_at	zinc finger with KRAB and SCAN domains 8	Zkscan8	0.399442	1.76007
1422700_at	arachidonate 12-lipoxygenase	Alox12	0.434575	1.7599
1442866_at	RCSD domain containing 1	Rcsd1	0.58701	1.75942
1420722_at	elongation of very long chain fatty acids (FEN1/Elo2, SUR4/Elo3, yeast)-like 3	Elovl3	0.525936	1.75756
1430492_at	phosphorylase kinase alpha 2	Phka2	0.532485	1.75503
1455666_at	zinc finger protein 595	Zfp595	0.642082	1.75396
1448043_x_at	ring finger protein 2	Rnf2	0.602273	1.75369
1422989_a_at	dystrophia myotonica-protein kinase	Dmpk	0.374531	1.75132
1440479_at	chromobox 4	Cbx4	0.50709	1.74955
1452318_a_at	heat shock protein 1B	Hspa1b	0.394403	1.74938
1459042_at	regulating synaptic membrane exocytosis 3	Rims3	0.254761	1.74816
1431311_at	son of sevenless homolog 1 (Drosophila)	Sos1	0.475206	1.74814
1446377_at	fibulin 5	Fbln5	0.520003	1.74771
1420860_at	integrin alpha 9	Itga9	0.543865	1.74742
1421590_at	MAS-related GPR, member H	Mrgprh	0.211029	1.74493
1427503_at	Immunoglobulin heavy constant gamma 3	Ighg3	0.636497	1.74474
1424360_at	TELO2 interacting protein 2	Tti2	0.632853	1.74472
1445434_at	snurportin 1	Snupn	0.499431	1.7442
1434629_at	zinc finger and BTB domain containing 26	Zbtb26	0.466238	1.74402
1418095_at	small muscle protein, X-linked	Smpx	0.184377	1.74339
1438745_at	predicted gene 10638	Gm10638	0.355755	1.74314
1441054_at	apolipoprotein L 8	Apol8	0.169208	1.74197
1457018_at	potassium large conductance calcium-activated channel, subfamily M, alpha member 1	Kcnma1	0.283389	1.74138
1451704_at	secretoglobin, family 2B, member 20 /// secretoglobin, family 2B, member 7	Scgb2b20 /// Scgb2b7	0.516728	1.74135
1460618_x_at	ring finger protein 19A pseudogene	Gm7444	0.40207	1.74087
1421128_at	zinc finger (CCCH type), RNA binding motif and serine/arginine rich 2	Zrsr2	0.259577	1.74083
1416184_s_at	high mobility group AT-hook 1 /// high mobility group AT-hook I, related sequence 1	Hmga1 /// Hmga1-rs1	0.611513	1.73984
1448906_at	cadherin 16	Cdh16	0.510735	1.73877
1425784_a_at	olfactomedin 1	Olfm1	0.278544	1.73855
1446560_at	protease, serine, 23	Prss23	0.308025	1.73638
1452542_x_at	transcription factor 3	Tcf3	0.645618	1.735
1427640_a_at	runt-related transcription factor 1; translocated to, 1 (cyclin D-related)	Runx1t1	0.37373	1.73445
1417971_at	nurim (nuclear envelope membrane protein)	Nrm	0.528568	1.7338
1457587_at	potassium voltage-gated channel, subfamily Q, member 5	Kcnq5	0.423959	1.73268
1447721_at	zinc finger and BTB domain containing 26	Zbtb26	0.306378	1.73228
1418882_at	NLR family, pyrin domain containing 5	Nlrp5	0.195274	1.73207
1423640_at	synaptoporin	Synpr	0.420185	1.73108
1457807_at	glucosamine-phosphate N-acetyltransferase 1	Gnpnat1	0.351852	1.73007
1446034_at	uncharacterized LOC432842	LOC432842	0.5775	1.72897
1431602_a_at	UDP-glucose glycoprotein glucosyltransferase 2	Uggt2	0.166756	1.72825
1416967_at	SRY-box containing gene 2	Sox2	0.461964	1.72788
1443813_x_at	branched chain ketoacid dehydrogenase kinase	Bckdk	0.601947	1.72768
1437620_x_at	aldehyde dehydrogenase 18 family, member A1	Aldh18a1	0.601555	1.72763
1417924_at	p21 protein (Cdc42/Rac)-activated kinase 3	Pak3	0.0809358	1.72692
1421782_a_at	submaxillary gland androgen regulated protein 2	Smr2	0.344399	1.72592
1448190_at	mitochondrial ribosomal protein L33	Mrpl33	0.622538	1.72287
1440921_at	NLR family, pyrin domain containing 12	Nlrp12	0.364497	1.72205
1439855_at	transmembrane and tetratricopeptide repeat containing 1	Tmtc1	0.521077	1.72116
1436578_at	ermin, ERM-like protein	Ermn	0.464334	1.72095
1458523_at	zinc finger, matrin-like	Zfml	0.340898	1.72059
1448556_at	prolactin receptor	Prlr	0.585592	1.71947
1457894_at	methyltransferase like 11B	Mettl11b	0.56279	1.71735
1424798_a_at	a disintegrin and metallopeptidase domain 5	Adam5	0.470808	1.71685
1418491_a_at	pseudouridine synthase 3	Pus3	0.555722	1.71663
1426183_a_at	CD209d antigen	Cd209d	0.383806	1.71656
1455954_x_at	GPI anchor attachment protein 1	Gpaa1	0.145408	1.71648
1459777_at	interleukin 1 receptor, type I	Il1r1	0.0721616	1.71602
1416391_at	pentatricopeptide repeat domain 1	Ptcd1	0.582117	1.71582
1458813_at	sodium channel, voltage-gated, type V, alpha	Scn5a	0.266872	1.71539
1430782_at	non-SMC condensin II complex, subunit D3	Ncapd3	0.425341	1.71411
1441487_at	tripartite motif-containing 2	Trim2	0.435314	1.71348
1451603_at	retbindin	Rtbdn	0.54869	1.71329
1450835_a_at	glial cell line derived neurotrophic factor family receptor alpha 4	Gfra4	0.536878	1.71229
1422236_at	tetratricopeptide repeat domain 39D	Ttc39d	0.517348	1.71179
1426786_s_at	DEAH (Asp-Glu-Ala-His) box polypeptide 38	Dhx38	0.529615	1.71154
1446196_at	high mobility group AT-hook 2	Hmga2	0.567221	1.71149
1451657_a_at	ecto-NOX disulfide-thiol exchanger 2	Enox2	0.621165	1.71127
1438618_at	expressed sequence AI507597	AI507597	0.373164	1.71105
1440234_at	LYR motif containing 9	Lyrm9	0.574434	1.71089
1430161_at	dihydrolipoamide S-succinyltransferase (E2 component of 2-oxo-glutarate complex)	Dlst	0.521451	1.71027
1458120_at	cadherin 18	Cdh18	0.363667	1.71004
1438911_at	septin 7	42254	0.658073	1.70994
1438603_x_at	mannan-binding lectin serine peptidase 1	Masp1	0.103593	1.70982
1430703_at	predicted gene 11559	Gm11559	0.669484	1.70807
1421650_at	matrix extracellular phosphoglycoprotein with ASARM motif (bone)	Mepe	0.214592	1.70603
1450238_at	glucosaminyl (N-acetyl) transferase 2, I-branching enzyme	Gcnt2	0.0955999	1.70569
1434990_at	protein phosphatase 1E (PP2C domain containing)	Ppm1e	0.221849	1.70317
1432521_at	predicted gene 10562	Gm10562	0.402104	1.70254
1429817_at	spermatogenesis and oogenesis specific basic helix-loop-helix 2	Sohlh2	0.544971	1.70184
1459769_at	cDNA sequence BC048609	BC048609	0.222229	1.6964
1433532_a_at	myelin basic protein	Mbp	0.355231	1.69638
1453117_at	surfeit gene 2	Surf2	0.585824	1.69585
1429576_at	membrane-spanning 4-domains, subfamily A, member 13	Ms4a13	0.351167	1.69545
1451014_at	receptor tyrosine kinase-like orphan receptor 1	Ror1	0.614162	1.69423
1418027_at	exonuclease 1	Exo1	0.545651	1.69252
1439140_at	predicted gene 20621	Gm20621	0.512173	1.69093
1418013_at	camello-like 1	Cml1	0.135879	1.69013
1420191_s_at	transmembrane protein 191C	Tmem191c	0.55339	1.68864
1427161_at	centromere protein F	Cenpf	0.374477	1.6866
1424107_at	kinesin family member 18A	Kif18a	0.647529	1.68652
1417167_at	exosome component 5	Exosc5	0.593914	1.68634
1439943_at	vacuolar protein sorting 54 (yeast)	Vps54	0.596869	1.68616
1427845_at	fibroblast growth factor receptor 4	Fgfr4	0.569628	1.68578
[truncated: 3,245 more rows]

## Sheet: Table S3 Proteom
Accession Number	Gene Symbol	Name	DSS:CON	DSS:CONPValue	DHY8:DSS	DHY8:DSSPValue	DHY8:CON	DHY8:CONPValue
P30730	LSHR	REVERSED Lutropin-choriogonadotropic hormone receptor	1.51356	0.475375	0.619441	0.443139	0.946237	0.926348
Q8BGQ7	SYAC	Alanyl-tRNA synthetase, cytoplasmic	1.51356	0.00695214	0.148594	5.80832e-06	0.199526	0.000220225
Q5XJY5	COPD	Coatomer subunit delta	1.51356	0.620087	0.155597	0.00549441	0.231207	0.00659155
O35286	DHX15	Putative pre-mRNA-splicing factor ATP-dependent RNA helicase DHX15	1.51356	0.0334834	0.139316	2.37057e-05	0.207014	0.00389876
P24547	IMDH2	Inosine-5'-monophosphate dehydrogenase 2	1.51356	0.082931	0.0559758	0.000354321	0.0737904	0.000385994
P62814	VATB2	V-type proton ATPase subunit B, brain isoform	1.51356	0.0246311	0.138038	0.0204294	0.188799	0.419185
Q61768	KINH	Kinesin-1 heavy chain	1.51356	0.0341931	0.277971	0.0672863	0.420727	0.709586
Q9JLB0-2	MPP6	Isoform Alpha of MAGUK p55 subfamily member 6	1.51356	0.181666	0.510505	0.0909972	0.772681	0.396365
68	AMBP	gi|27806743|ref|NP_776414.1| inter-alpha-trypsin inhibitor (protein HC), light [Bos taurus (contaminant)]	1.52757	0.595755	0.539511	0.302751	0.794328	0.803825
P55821	STMN2	REVERSED Stathmin-2	1.52757	0.469138	0.343558	0.224627	0.524808	0.35321
Q9CZ30	OLA1	Obg-like ATPase 1	1.52757	0.0561312	0.0413047	1.04766e-07	0.0539511	2.55756e-06
Q8R016	BLMH	Bleomycin hydrolase	1.52757	0.101535	0.0353183	0.00366682	0.0505825	0.0260202
Q9D9L5	ACTT2	Actin-related protein T2	1.52757	0.495128	0.0222843	0.154783	0.0288403	0.203808
Q9Z0N1	IF2G	Eukaryotic translation initiation factor 2 subunit 3, X-linked	1.52757	0.294702	0.144544	0.0444742	0.201372	0.0865118
Q05D44	IF2P	Eukaryotic translation initiation factor 5B	1.52757	0.132046	0.141906	0.00143417	0.207014	0.020075
P05202	AATM	Aspartate aminotransferase, mitochondrial	1.52757	0.342598	0.0380189	0.00166654	0.0394457	8.2788e-05
Q8K1R3	PNPT1	Polyribonucleotide nucleotidyltransferase 1, mitochondrial	1.52757	0.0606821	0.144544	1.72835e-05	0.21677	0.00511244
P17809	GTR1	Solute carrier family 2, facilitated glucose transporter member 1	1.52757	0.251971	0.0405509	0.00670705	0.0608135	0.0325271
Q9EQH3	VPS35	Vacuolar protein sorting-associated protein 35	1.52757	0.359146	0.0337287	0.0168883	0.0496592	0.0234378
Q9ER69	FL2D	Pre-mRNA-splicing regulator WTAP	1.52757	0.175648	0.203236	0.00691033	0.275423	0.0100341
P51910	APOD	Apolipoprotein D	1.52757	0.418953	0.49204	0.327334	0.765597	0.716762
P61922	GABT	4-aminobutyrate aminotransferase, mitochondrial	1.5417	0.910509	0.0642688	0.00352449	0.0772681	0.0141521
Q99LC2	CSTF1	Cleavage stimulation factor subunit 1	1.5417	0.464108	0.144544	0.127982	0.224906	0.164335
Q8BGT8	PHIPL	Phytanoyl-CoA hydroxylase-interacting protein-like	1.5417	0.156013	0.12942	0.0246863	0.195884	0.193535
P41105	RL28	60S ribosomal protein L28	1.5417	0.400439	0.121339	0.46442	0.167494	0.514021
Q8BRH0	TMTC3	Transmembrane and TPR repeat-containing protein 3	1.5417	0.610302	0.207014	0.175194	0.313329	0.215566
Q9JK38	GNA1	Glucosamine 6-phosphate N-acetyltransferase	1.55597	0.206385	0.0847227	0.0290129	0.131826	0.0599647
Q9EQI8	RM46	39S ribosomal protein L46, mitochondrial	1.55597	0.321258	0.296483	0.190074	0.452898	0.981201
Q9EQ61	PESC	Pescadillo homolog	1.55597	0.457959	0.239883	0.171675	0.376704	0.244334
Q8BX09-2	RBBP5	Isoform 2 of Retinoblastoma-binding protein 5	1.55597	0.477951	0.428549	0.298401	0.660694	0.532397
Q9CQ22	CK059	RhoA activator C11orf59 homolog	1.55597	0.154141	0.654636	0.163007	1.02802	0.943875
Q9CWJ9	PUR9	Bifunctional purine biosynthesis protein PURH	1.57036	0.94235	0.201372	0.121343	0.293765	0.0456885
Q9D2R6	CCD56	Coiled-coil domain-containing protein 56	1.57036	0.506589	0.0383707	0.149678	0.0519996	0.193101
O70194	EIF3D	Eukaryotic translation initiation factor 3 subunit D	1.57036	0.120809	0.199526	0.0570424	0.319154	0.223774
P97379-2	G3BP2	Isoform B of Ras GTPase-activating protein-binding protein 2	1.57036	0.304891	0.265461	0.369135	0.413047	0.771267
Q9WU62	INCE	Inner centromere protein	1.57036	0.142175	0.49204	0.187971	0.77983	0.465351
Q8K224	NAT10	N-acetyltransferase 10	1.57036	0.448271	0.175388	0.1415	0.277971	0.190171
Q50L43	PA24D	Cytosolic phospholipase A2 delta	1.57036	0.446301	0.448745	0.293322	0.717794	0.559024
Q8C7Q4	RBM4	RNA-binding protein 4	1.57036	0.33184	0.237684	0.156919	0.376704	0.332581
Q5YD48-2	A1CF	Isoform 2 of AP	1.58489	0.345033	0.201372	0.0815751	0.319154	0.175898
Q58A65-2	JIP4	Isoform 2 of C-Jun-amino-terminal kinase-interacting protein 4	1.58489	0.0107821	0.147231	0.00076083	0.226986	0.00910361
Q920B9	SP16H	FACT complex subunit SPT16	1.58489	0.0272324	0.0487529	0.001406	0.0660693	0.00838509
O55201-2	SPT5H	Isoform 2 of Transcription elongation factor SPT5	1.58489	0.977563	0.11272	0.0155739	0.170608	0.0323654
Q791V5	MTCH2	Mitochondrial carrier homolog 2	1.58489	0.439254	0.359749	0.234986	0.580764	0.400672
Q8C2Q3	RBM14	RNA-binding protein 14	1.58489	0.232028	0.636796	0.491845	1	0.180838
Q91XV3	BASP1	Brain acid soluble protein 1	1.59956	0.252103	0.214783	0.253441	0.363078	0.667368
P47199	QOR	Quinone oxidoreductase	1.59956	0.255533	0.0169044	0.00366309	0.0195884	0.00623972
P04186	CFAB	Complement factor B	1.59956	0.138724	0.496592	0.107737	0.801678	0.72932
P06802	ENPP1	Ectonucleotide pyrophosphatase/phosphodiesterase family member 1	1.59956	0.437851	0.197697	0.151863	0.319154	0.211727
O55126	NIPS2	Protein NipSnap homolog 2	1.59956	0.434689	0.510505	0.340755	0.831764	0.727208
Q9Z1E4	GYS1	Glycogen [starch] synthase, muscle	1.59956	0.593884	0.169044	0.277788	0.246604	0.3942
Q68FF0-2	K1841	Isoform 2 of Uncharacterized protein KIAA1841	1.59956	0.364134	0.444631	0.267226	0.724436	0.616626
P62264	RS14	40S ribosomal protein S14	1.59956	0.380691	0.660694	0.991295	1.0666	0.54438
Q8K019	BCLF1	Bcl-2-associated transcription factor 1	1.61436	0.318609	0.452898	0.0999239	0.717794	0.316682
Q80ZN9	CX6B2	Cytochrome c oxidase subunit 6B2	1.61436	0.595111	0.0698232	0.168858	0.104713	0.208527
P70677	CASP3	Caspase-3	1.61436	0.395624	0.135519	0.0350599	0.21677	0.0540162
Q8VDJ3	VIGLN	Vigilin	1.61436	0.000336225	0.190546	6.93611e-06	0.288403	0.00683904
O88477	IF2B1	Insulin-like growth factor 2 mRNA-binding protein 1	1.61436	0.00166704	0.0291072	5.96963e-10	0.0394457	6.16241e-05
Q08460	KCMA1	Calcium-activated potassium channel subunit alpha-1	1.61436	0.428139	0.205116	0.160391	0.340408	0.231384
P46460	NSF	Vesicle-fusing ATPase	1.61436	0.013442	0.296483	0.0188479	0.49204	0.598633
Q61136	PRP4B	Serine/threonine-protein kinase PRP4 homolog	1.61436	0.0553133	0.444631	0.0206465	0.691831	0.443834
Q99JI4	PSMD6	26S proteasome non-ATPase regulatory subunit 6	1.61436	0.127894	0.293765	0.0212105	0.461318	0.176163
P63321	RALA	Ras-related protein Ral-A	1.61436	0.152209	0.0903649	0.225126	0.11695	0.419439
Q80UG5-3	SEPT9	Isoform 3 of Septin-9	1.61436	0.00689616	0.515229	0.32833	0.787046	0.654783
Q7TN29-2	SMAP2	Isoform 2 of Stromal membrane-associated protein 2	1.61436	0.451602	0.487529	0.560557	0.758578	0.835667
99	SERPINA1	gi|1703026|sp|P50447|A1AT_PIG Alpha-1-antitrypsin precursor (Alpha-1 protease inhibitor) (Alpha-1-antiproteinase) [Sus scrofa (contaminant)]	1.6293	0.380518	0.187068	0.034346	0.301995	0.0536923
O70435	PSA3	Proteasome subunit alpha type-3	1.6293	0.0861033	0.0751623	4.25289e-07	0.120226	7.62324e-06
Q9WTM5	RUVB2	RuvB-like 2	1.6293	0.00600032	0.0432514	5.19326e-10	0.0672977	5.84423e-05
Q9CQ48	NUDC2	NudC domain-containing protein 2	1.6293	0.423476	0.436516	0.284104	0.717794	0.564562
Q3UM45	PP1R7	Protein phosphatase 1 regulatory subunit 7	1.6293	0.0610101	0.229087	0.0865615	0.380189	0.284525
P62908	RS3	40S ribosomal protein S3	1.6293	0.0103647	0.328095	0.0131959	0.496592	0.371075
Q8CIM1	LRC45	REVERSED Leucine-rich repeat-containing protein 45	1.64437	0.417113	0.608135	0.431428	1.01859	0.962575
Q9DBJ1	PGAM1	Phosphoglycerate mutase 1	1.64437	0.679458	0.109648	5.67416e-06	0.17378	2.96974e-05
Q3UYC0-2	PPM1H	Isoform 2 of Protein phosphatase 1H	1.64437	0.313469	0.0591562	0.0423753	0.0765597	0.0780346
Q99K48	NONO	Non-P	1.64437	0.445287	0.299226	0.0345015	0.49204	0.0873185
Q9DBZ1	IKIP	Inhibitor of nuclear factor kappa-B kinase-interacting protein	1.64437	0.609302	0.220801	0.309831	0.366438	0.446112
Q60715-2	P4HA1	Isoform 2 of Prolyl 4-hydroxylase subunit alpha-1	1.64437	0.283872	0.212814	0.03533	0.340408	0.301924
P16331	PH4H	Phenylalanine-4-hydroxylase	1.64437	0.410705	0.559758	0.28899	0.928966	0.602456
Q99LD8	DDAH2	N(G),N(G)-dimethylarginine dimethylaminohydrolase 2	1.65959	0.478763	0.244343	0.247726	0.401791	0.401458
Q8CFZ4	GPC3	Glypican-3	1.65959	0.139643	0.0505825	0.00589429	0.0912011	0.188697
P47968	RPIA	Ribose-5-phosphate isomerase	1.65959	0.611365	0.483059	0.136653	0.794328	0.160295
Q9D4F8	GCP4	Gamma-tubulin complex component 4	1.65959	0.413816	0.398107	0.257979	0.666807	0.495023
P61290	PSME3	Proteasome activator complex subunit 3	1.67494	0.00841501	0.0325087	0.00219965	0.0444631	0.00557545
Q6P9R1	DDX51	REVERSED ATP-dependent RNA helicase DDX51	1.69044	0.47889	0.0946237	0.0590577	0.15417	0.0655336
Q9ER88	RT29	28S ribosomal protein S29, mitochondrial	1.69044	0.387772	0.316228	0.19821	0.539511	0.342828
Q02248	CTNB1	Catenin beta-1	1.69044	0.0108429	0.105682	0.00522771	0.157036	0.0371453
P70168	IMB1	Importin subunit beta-1	1.69044	0.0304878	0.133045	2.91164e-07	0.229087	0.00842264
Q3UMY5-4	EMAL4	Isoform 4 of Echinoderm microtubule-associated protein-like 4	1.69044	0.174516	0.564937	0.0651937	0.903649	0.409323
Q99JB2	STML2	Stomatin-like protein 2	1.69044	0.177816	0.0539511	0.0343569	0.0862978	0.0520914
Q61207	SAP	Sulfated glycoprotein 1	1.69044	0.726989	0.380189	0.779057	0.591562	0.965973
Q91V41	RAB14	Ras-related protein Rab-14	1.69044	0.658916	0.636796	0.859864	1.05682	0.620518
P84102	SERF2	Small EDRK-rich factor 2	1.69044	0.675453	0.666807	0.92443	1.08643	0.613625
P58771	TPM1	Tropomyosin alpha-1 chain	1.69044	0.403817	0.580764	0.403293	0.990832	0.998508
P60843	IF4A1	Eukaryotic initiation factor 4A-I	1.70608	0.0555029	0.18197	0.0325342	0.301995	0.110172
P19253	RL13A	60S ribosomal protein L13a	1.70608	0.376612	0.0413047	0.0200866	0.0666807	0.0282618
P97434-3	MPRIP	Isoform 3 of Myosin phosphatase Rho-interacting protein	1.70608	0.494188	0.343558	0.98515	0.60256	0.7785
P62315	SMD1	Small nuclear ribonucleoprotein Sm D1	1.70608	0.563465	0.0928966	0.0828423	0.149969	0.124009
Q9QZE7	TSNAX	Translin-associated protein X	1.70608	0.596828	0.123595	0.26507	0.190546	0.369092
P68373	TBA1C	Tubulin alpha-1C chain	1.70608	0.521649	0.0564937	0.177901	0.0870964	0.237865
Q9CQL7	MOFA1	RF4 family-associated protein 1	1.72187	0.390846	0.178649	0.142978	0.310456	0.207502
Q61239	FNTA	Protein farnesyltransferase/geranylgeranyltransferase type-1 subunit alpha	1.72187	0.491911	0.0121339	0.134181	0.0131826	0.170315
Q99JX4	EIF3M	Eukaryotic translation initiation factor 3 subunit M	1.72187	0.174901	0.253513	0.0300072	0.432514	0.0700517
P63005	LIS1	Platelet-activating factor acetylhydrolase IB subunit alpha	1.72187	0.279605	0.17378	0.032116	0.291072	0.0976171
P25206	MCM3	DNA replication licensing factor MCM3	1.72187	0.232822	0.413047	0.217529	0.672977	0.841322
P70268	PKN1	Serine/threonine-protein kinase N1	1.72187	0.375331	0.340408	0.277153	0.580764	0.630797
P70392	RGRF2	REVERSED Ras-specific guanine nucleotide-releasing factor 2	1.7378	0.388441	0.316228	0.209481	0.549541	0.374675
P05201	AATC	Aspartate aminotransferase, cytoplasmic	1.7378	0.210327	0.0496592	0.0639182	0.0731139	0.0707806
Q9D711	PIR	Pirin	1.7378	0.364766	0.0220801	0.0149417	0.0325087	0.0202181
Q8K4Z5	SF3A1	Splicing factor 3A subunit 1	1.7378	0.0439116	0.233346	0.00439169	0.366438	0.0489549
Q8VE70	PDC10	Programmed cell death protein 10	1.7378	0.38218	0.224906	0.248329	0.37325	0.666308
41	ITIH4	gi|3024051|sp|P79263|ITIH4_PIG Inter-alpha-trypsin inhibitor heavy chain H4 precursor (ITI heavy chain H4) (Inter-alpha-inhibitor heavy chain 4) (Inter-alpha-trypsin inhibitor family heavy chain-related protein) (IHRP) (Major acute phase protein) (MAP) [Sus scrofa (contaminant)]	1.75388	0.812053	0.0214783	0.271136	0.0331131	0.308408
O70220	FOXQ1	REVERSED Forkhead box protein Q1	1.75388	0.382842	0.107647	0.111303	0.190546	0.148673
Q8VBV3	EXOS2	Exosome complex exonuclease RRP4	1.75388	0.321957	0.135519	0.0230223	0.226986	0.268198
Q9CQC9	SAR1B	GTP-binding protein SAR1b	1.75388	0.484996	0.0529663	0.00403459	0.0862978	0.017013
P62754	RS6	40S ribosomal protein S6	1.75388	0.403098	0.242103	0.0446507	0.432514	0.145089
Q8K009	AL1L2	Probable 10-formyltetrahydrofolate dehydrogenase ALDH1L2	1.77011	0.318999	0.452898	0.0990037	0.801678	0.137652
Q9QYI3	DNJC7	DnaJ homolog subfamily C member 7	1.77011	0.321643	0.120226	0.0377241	0.210863	0.350955
Q8BTU1	CP080	UPF0468 protein C16orf80 homolog	1.77011	0.611282	0.0666807	0.155202	0.118032	0.186225
O08788-2	DCTN1	Isoform 2 of Dynactin subunit 1	1.77011	0.0244752	0.529663	0.392663	0.912011	0.0488548
Q61781	K1C14	Keratin, type I cytoskeletal 14	1.77011	0.638482	0.564937	0.636226	1.05682	0.421983
Q91VA6	PDIP2	Polymerase delta-interacting protein 2	1.77011	0.178554	0.20893	0.098139	0.359749	0.601497
Q61458	CCNH	REVERSED Cyclin-H	1.78649	0.428376	0.218776	0.237949	0.398107	0.418632
Q8BME9	CBLN4	Cerebellin-4	1.78649	0.451599	0.280543	0.203747	0.505825	0.315157
P80315	TCPD	T-complex protein 1 subunit delta	1.78649	0.00338745	0.0954993	0.00689804	0.161436	0.23008
Q9R1T2	SAE1	SUM	1.78649	0.07433	0.0625173	0.000821228	0.110662	0.0033083
Q9D554	SF3A3	Splicing factor 3A subunit 3	1.78649	0.26303	0.128233	0.00401005	0.224906	0.018926
Q8VH51-3	RBM39	Isoform 3 of RNA-binding protein 39	1.78649	0.188355	0.630957	0.181897	1.11686	0.651302
O70200	AIF1	Allograft inflammatory factor 1	1.80302	0.440468	0.501187	0.332668	0.912011	0.784269
Q9JKR6	HYOU1	Hypoxia up-regulated protein 1	1.80302	0.0100515	0.258226	0.0279001	0.465586	0.450547
O35900	LSM2	U6 snRNA-associated Sm-like protein LSm2	1.80302	0.493552	0.0483059	0.0319813	0.0862978	0.290456
P68510	1433F	14-3-3 protein eta	1.80302	0.18034	0.246604	0.191287	0.448745	0.4417
Q9DBL1	ACDSB	Short/branched chain specific acyl-CoA dehydrogenase, mitochondrial	1.8197	0.443391	0.0912011	0.0263119	0.155597	0.0364298
A2RRY8-3	SPAS1	Isoform 3 of Spermatogenesis-associated serine-rich protein 1	1.8197	0.417535	0.0187068	0.138627	0.0253513	0.191699
Q9CXU9	EIF1B	Eukaryotic translation initiation factor 1b	1.83654	0.357913	0.465586	0.305357	0.870964	0.794085
Q8CIG8	ANM5	Protein arginine N-methyltransferase 5	1.83654	0.0210947	0.11272	0.000184387	0.197697	0.0318839
P51410	RL9	60S ribosomal protein L9	1.83654	0.390379	0.0887156	0.0162387	0.169044	0.105857
Q9CZW5	TOM70	Mitochondrial import receptor subunit T	1.85353	0.0716617	0.0691831	0.0225824	0.118032	0.107491
Q62431	ARI3A	AT-rich interactive domain-containing protein 3A	1.85353	0.411813	0.413047	0.0671694	0.724436	0.119052
P31428	DPEP1	Dipeptidase 1	1.85353	0.357352	0.534564	0.359562	1	0.992246
P35505	FAAA	Fumarylacetoacetase	1.85353	0.43764	0.237684	0.268264	0.390841	0.495889
P97855	G3BP1	Ras GTPase-activating protein-binding protein 1	1.85353	0.159178	0.591562	0.315595	1.04713	0.957486
O88958	GNPI1	Glucosamine-6-phosphate isomerase 1	1.85353	0.506949	0.0580764	0.12113	0.100925	0.14834
P70698	PYRG1	CTP synthase 1	1.85353	0.325843	0.0457088	0.0260404	0.077983	0.0410173
P62192	PRS4	26S protease regulatory subunit 4	1.85353	0.0361679	0.104713	0.000906911	0.190546	0.0567236
O70475	UGDH	UDP-glucose 6-dehydrogenase	1.85353	0.0345739	0.12942	0.000811206	0.224906	0.0360157
Q6A4J8-3	UBP7	Isoform 3 of Ubiquitin carboxyl-terminal hydrolase 7	1.85353	0.0225045	0.0954993	0.000148515	0.17378	0.00052622
Q3TXS7	PSMD1	26S proteasome non-ATPase regulatory subunit 1	1.85353	0.545235	0.310456	0.291291	0.529663	0.451923
P25444	RS2	40S ribosomal protein S2	1.85353	0.0244069	0.267917	0.0109515	0.501187	0.266419
Q921Z5	TFIP8	Tumor necrosis factor alpha-induced protein 8	1.85353	0.511177	0.0672977	0.263557	0.0954993	0.414981
Q9CQV8	1433B	14-3-3 protein beta/alpha	1.85353	0.825219	0.301995	0.578116	0.586138	0.615232
Q9D5V6	SYAP1	REVERSED Synapse-associated protein 1	1.87068	0.272258	0.353183	0.171658	0.666807	0.389682
Q570Y9	DEPD6	DEP domain-containing mT	1.87068	0.604818	0.313329	0.331583	0.510505	0.491193
P61982	1433G	14-3-3 protein gamma	1.87068	0.135405	0.0660693	0.00356861	0.110662	0.00378352
Q6GQT1	A2MP	Alpha-2-macroglobulin-P	1.88799	0.437987	0.337287	0.325152	0.619441	0.671139
Q68FD7	FNIP1	Folliculin-interacting protein 1	1.88799	0.346723	0.440555	0.247619	0.83946	0.574693
Q9R257	HEBP1	Heme-binding protein 1	1.88799	0.369624	0.133045	0.130656	0.251189	0.188416
P16627	HS71L	Heat shock 70 kDa protein 1-like	1.88799	0.622457	0.0744732	0.264517	0.138038	0.356937
Q61316	HSP74	Heat shock 70 kDa protein 4	1.88799	0.026059	0.104713	6.28066e-07	0.185353	5.36601e-06
Q91V76	CK054	Ester hydrolase C11orf54 homolog	1.90546	0.399334	0.192309	0.670404	0.363078	0.626852
P61963	DCAF7	DDB1- and CUL4-associated factor 7	1.92309	0.340209	0.0794328	0.0981014	0.15417	0.132142
Q8BGT5	ALAT2	Alanine aminotransferase 2	1.92309	0.104608	0.0672977	0.17231	0.120226	0.534267
P28352	APEX1	DNA-(apurinic or apyrimidinic site) lyase	1.92309	0.0247965	0.0685488	0.000263569	0.115878	0.00974867
Q8VEK3	HNRPU	Heterogeneous nuclear ribonucleoprotein U	1.92309	0.766996	0.343558	0.0375214	0.570164	0.0308424
P17918	PCNA	Proliferating cell nuclear antigen	1.92309	0.0086973	0.0483059	0.000759878	0.083946	0.00839196
Q61245-2	COBA1	REVERSED Isoform Short of Collagen alpha-1(XI) chain	1.94089	0.329373	0.151356	0.0987135	0.288403	0.13513
Q99LD9	EI2BB	Translation initiation factor eIF-2B subunit beta	1.94089	0.805905	0.123595	0.296942	0.233346	0.343239
P11438	LAMP1	Lysosome-associated membrane glycoprotein 1	1.94089	0.62765	0.205116	0.22958	0.369828	0.296505
Q5SF07	IF2B2	Insulin-like growth factor 2 mRNA-binding protein 2	1.94089	0.00302042	0.0928966	1.4043e-05	0.180302	0.00543961
Q61074	PPM1G	Protein phosphatase 1G	1.94089	0.0211051	0.135519	3.26399e-05	0.244343	0.00730711
P57784	RU2A	U2 small nuclear ribonucleoprotein A'	1.94089	0.285084	0.325087	0.452934	0.660694	0.947346
Q6PHZ2-2	KCC2D	Isoform Delta 6 of Calcium/calmodulin-dependent protein kinase type II subunit delta	1.95885	0.479097	0.275423	0.784274	0.554626	0.788374
P62889	RL30	60S ribosomal protein L30	1.95885	0.0387781	0.164437	0.0211293	0.313329	0.371371
Q569Z6	TR150	Thyroid hormone receptor-associated protein 3	1.95885	0.236051	0.248886	0.509475	0.428549	0.862313
Q9D312	K1C20	Keratin, type I cytoskeletal 20	1.97697	0.111062	0.501187	0.977572	1.00925	0.2214
P07744	K2C4	Keratin, type II cytoskeletal 4	1.97697	0.57338	0.120226	0.276956	0.222843	0.403791
Q8K023-2	AKC1H	Isoform 2 of Aldo-keto reductase family 1 member C18	1.97697	0.00673555	0.0359749	4.1118e-06	0.0544503	0.00104071
P60122	RUVB1	RuvB-like 1	1.97697	0.000105135	0.0608135	1.56513e-07	0.103753	0.000333003
Q8BK67	RCC2	Protein RCC2	1.97697	0.00321939	0.21677	0.0020922	0.432514	0.170825
Q9CSU0	RPR1B	Regulation of nuclear pre-mRNA domain-containing protein 1B	1.97697	0.10153	0.140605	0.0481514	0.275423	0.16117
Q6PAM1	TXLNA	Alpha-taxilin	1.97697	0.0609248	0.263027	0.0185846	0.519996	0.171663
O88456	CPNS1	Calpain small subunit 1	1.99526	0.585384	0.138038	0.340592	0.229087	0.362365
Q3V3R4	ITA1	Integrin alpha-1	1.99526	0.432809	0.133045	0.150245	0.251189	0.209967
Q61703	ITIH2	Inter-alpha-trypsin inhibitor heavy chain H2	1.99526	0.0230406	0.135519	0.000257694	0.265461	0.0338166
P26638	SYSC	Seryl-tRNA synthetase, cytoplasmic	1.99526	0.357613	0.145881	0.00764885	0.272898	0.0185974
Q9CZX8	RS19	40S ribosomal protein S19	1.99526	0.160349	0.212814	0.148776	0.376704	0.660182
A2ADY9	DDI2	Protein DDI1 homolog 2	2.01372	0.879126	0.233346	0.0596629	0.461318	0.0392927
Q61035	SYHC	Histidyl-tRNA synthetase, cytoplasmic	2.01372	0.00572117	0.100925	1.87237e-05	0.197697	0.0137492
P35175	CYT3	Stefin-3	2.01372	0.331424	0.235505	0.0736162	0.353183	0.0920847
Q9D0W5	PPIL1	Peptidyl-prolyl cis-trans isomerase-like 1	2.03236	0.251891	0.42462	0.80262	0.855067	0.596745
P62746	RHOB	Rho-related GTP-binding protein RhoB	2.03236	0.318137	0.636796	0.459205	1.30617	0.613542
Q6IE21	OTU6A	TU domain-containing protein 6A	2.03236	0.319001	0.251189	0.176367	0.510505	0.339978
Q64462	CP4B1	Cytochrome P450 4B1	2.05116	0.397358	0.0322107	0.131999	0.0539511	0.183889
O55135	IF6	Eukaryotic translation initiation factor 6	2.05116	0.107588	0.0794328	0.0910728	0.16293	0.391742
Q9CXY6	ILF2	Interleukin enhancer-binding factor 2	2.05116	0.28936	0.0887156	0.00100782	0.161436	0.0063922
P53026	RL10A	60S ribosomal protein L10a	2.05116	0.0506851	0.167494	0.000231009	0.328095	0.0182692
Q9D2G2	ODO2	Dihydrolipoyllysine-residue succinyltransferase component of 2-oxoglutarate dehydrogenase complex, mitochondrial	2.07014	0.107337	0.383707	0.742281	0.717794	0.486931
P97351	RS3A	40S ribosomal protein S3a	2.07014	0.777635	0.359749	0.0711176	0.704693	0.104143
Q3UX83-2	1A1L2	Isoform 2 of 1-aminocyclopropane-1-carboxylate synthase-like protein 2	2.0893	0.366664	0.0524807	0.115638	0.0990832	0.159608
P19639	GSTM4	Glutathione S-transferase Mu 3	2.0893	0.309137	0.0772681	0.0970956	0.16293	0.135965
Q8VED5	K2C79	Keratin, type II cytoskeletal 79	2.0893	0.603271	0.0981748	0.915327	0.185353	0.551413
O70252	HMOX2	Heme oxygenase 2	2.0893	0.208754	0.16293	0.0229473	0.331131	0.0431417
P70178	SIX5	REVERSED Homeobox protein SIX5	2.10863	0.528754	0.0519996	0.19366	0.0887156	0.263983
Q6ZWN5	RS9	40S ribosomal protein S9	2.10863	0.0274362	0.16293	0.00193101	0.340408	0.085841
P70362	UFD1	Ubiquitin fusion degradation protein 1 homolog	2.10863	0.0193364	0.0613762	0.00021203	0.119124	0.0443152
Q91YQ5	RPN1	Dolichyl-diphosphooligosaccharide--protein glycosyltransferase subunit 1	2.10863	0.61067	0.440555	0.330678	0.990832	0.57972
Q91WM3	U3IP2	U3 small nucleolar RNA-interacting protein 2	2.10863	0.404273	0.0831764	0.105693	0.178649	0.465322
Q9JKV1	ADRM1	Proteasomal ubiquitin receptor ADRM1	2.14783	0.515993	0.260615	0.213162	0.559758	0.414722
Q3UIK4	MTL14	Methyltransferase-like protein 14	2.1677	0.219319	0.0724436	0.0643603	0.155597	0.185946
Q3V188	ENDOU	REVERSED Poly(U)-specific endoribonuclease	2.18776	0.291353	0.0887156	0.102536	0.195884	0.151424
O88543	CSN3	P9 signalosome complex subunit 3	2.18776	0.460765	0.0794328	0.065219	0.180302	0.106363
Q9CQ36	DPOE4	DNA polymerase epsilon subunit 4	2.18776	0.292505	0.212814	0.158818	0.469894	0.30789
P51660	DHB4	Peroxisomal multifunctional enzyme type 2	2.18776	0.00631153	0.0597035	0.000471466	0.122462	0.0724318
P97816	S100G	Protein S100-G	2.18776	0.194348	0.359749	0.0621585	0.787046	0.472189
Q91ZE0	TMLH	Trimethyllysine dioxygenase, mitochondrial	2.208	0.288442	0.125893	0.119412	0.280543	0.191995
Q9R1P1	PSB3	Proteasome subunit beta type-3	2.22844	0.0291061	0.0440555	0.00423741	0.0772681	0.0166056
Q8R4X3	RBM12	RNA-binding protein 12	2.22844	0.0784343	0.349945	0.0570256	0.758578	0.604053
Q9CY58-3	PAIRB	Isoform 3 of Plasminogen activator inhibitor 1 RNA-binding protein	2.22844	0.287775	0.140605	0.126272	0.316228	0.210325
Q3V0C5-4	UBP48	Isoform 4 of Ubiquitin carboxyl-terminal hydrolase 48	2.22844	0.424298	0.0356451	0.153755	0.0630957	0.219223
69	TTR	gi|27806789|ref|NP_776392.1| transthyretin (prealbumin, amyloidosis type I) [Bos taurus (contaminant)]	2.24905	0.0355623	0.0331131	0.0264887	0.0666807	0.305661
Q9DA08	SGF29	SAGA-associated factor 29 homolog	2.24905	0.397286	0.0136773	0.145137	0.0178649	0.209966
P63073	IF4E	Eukaryotic translation initiation factor 4E	2.24905	0.7658	0.376704	0.150847	0.895365	0.0537729
Q9R1P3	PSB2	Proteasome subunit beta type-2	2.24905	0.479247	0.100925	0.0382468	0.212814	0.0391351
P11983	TCPA	T-complex protein 1 subunit alpha	2.24905	0.00715679	0.0405509	6.46271e-07	0.0794328	0.000286068
O08736	CASPC	Caspase-12	2.26987	0.287393	0.0147231	0.0762999	0.020893	0.101145
Q11136	PEPD	Xaa-Pro dipeptidase	2.26987	0.215789	0.316228	0.130577	0.717794	0.555745
Q8BK63	KC1A	Casein kinase I isoform alpha	2.26987	0.339072	0.0299226	0.00495467	0.0654636	0.00594801
O09164	SODE	Extracellular superoxide dismutase [Cu-Zn]	2.26987	0.292319	0.465586	0.306562	1.07647	0.930892
P68372	TBB2C	Tubulin beta-2C chain	2.26987	0.79547	0.0847227	0.437905	0.177011	0.539106
Q9R0Q6	ARC1A	Actin-related protein 2/3 complex subunit 1A	2.29087	0.279462	0.214783	0.159946	0.496592	0.327956
Q9D0F9	PGM1	Phosphoglucomutase-1	2.29087	0.0773923	0.0619441	0.000433688	0.124738	0.0139353
Q80X90	FLNB	Filamin-B	2.31206	2.42312e-07	0.515229	0.0117957	1.14815	0.507802
Q3UMU9	HDGR2	Hepatoma-derived growth factor-related protein 2	2.31206	0.0410579	0.369828	0.164936	0.801678	0.638776
Q99M71	EPDR1	Mammalian ependymin-related protein 1	2.31206	0.275621	0.0237684	0.0655055	0.0524807	0.0841562
Q8C5H8-3	CE033	Isoform 3 of UPF0465 protein C5orf33 homolog	2.33346	0.13331	0.376704	0.0978197	0.824138	0.66621
Q9DCL9	PUR6	Multifunctional protein ADE2	2.33346	0.0624403	0.104713	0.00121314	0.226986	0.126962
P05064	ALDOA	Fructose-bisphosphate aldolase A	2.37684	0.0611277	0.340408	0.208926	0.758578	0.903168
P50518	VATE1	V-type proton ATPase subunit E 1	2.37684	0.0316097	0.122462	0.111674	0.260615	0.511085
Q6NZJ6	IF4G1	Eukaryotic translation initiation factor 4 gamma 1	2.42103	0.107074	0.409261	0.50955	1.01859	0.77393
P36536	SAR1A	GTP-binding protein SAR1a	2.42103	0.503206	0.0390841	0.161705	0.0824138	0.214004
P28843	DPP4	Dipeptidyl peptidase 4	2.42103	0.764251	0.0887156	0.0265094	0.205116	0.0505878
Q9CPT3	NANP	N-acylneuraminate-9-phosphatase	2.42103	0.263405	0.0190546	0.0483671	0.0353183	0.0584581
P14733	LMNB1	Lamin-B1	2.44343	0.000155838	0.299226	0.0120437	0.691831	0.725893
Q99KC8	VMA5A	von Willebrand factor A domain-containing protein 5A	2.46604	0.679584	0.549541	0.637055	1.41906	0.812144
Q8CIQ7	DOCK3	REVERSED Dedicator of cytokinesis protein 3	2.48886	0.460348	0.0229087	0.157113	0.0409261	0.215788
Q5SUF2	LC7L3	Luc7-like protein 3	2.48886	0.00268952	0.0787046	0.000550378	0.185353	0.017719
Q3UMT1	PP12C	REVERSED Protein phosphatase 1 regulatory subunit 12C	2.51189	0.388041	0.0263027	0.0966982	0.049204	0.123248
Q99J45	NRBP	Nuclear receptor-binding protein	2.51189	0.254635	0.405508	0.261874	1.01859	0.953593
P97355	SPSY	Spermine synthase	2.51189	0.338292	0.0855067	0.0196631	0.210863	0.0414514
Q6P542	ABCF1	ATP-binding cassette sub-family F member 1	2.55859	0.0244088	0.280543	0.214179	0.751623	0.81379
Q60692	PSB6	Proteasome subunit beta type-6	2.55859	0.232397	0.0580764	0.0707637	0.135519	0.203505
Q8CF89	TAB1	TGF-beta-activated kinase 1 and MAP3K7-binding protein 1	2.55859	0.248297	0.0110662	0.0477488	0.011272	0.0583752
70	SERPINA1	gi|27806941|ref|NP_776307.1| serine (or cysteine) proteinase inhibitor, clade A (alpha-1antiproteinase, antitrypsin), member 1 [Bos taurus (contaminant)]	2.58226	1.73832e-05	0.0253513	1.9984e-14	0.0452898	1.27005e-06
Q64018	GLRA1	Glycine receptor subunit alpha-1	2.58226	0.285271	0.549541	0.358061	1.41906	0.707991
Q9QUR6	PPCE	Prolyl endopeptidase	2.58226	0.039952	0.183654	0.0199964	0.432514	0.168911
Q921M3	SF3B3	Splicing factor 3B subunit 3	2.58226	0.032188	0.0570164	1.25169e-06	0.123595	0.000375108
Q04750	TOP1	DNA topoisomerase 1	2.58226	0.00965487	0.0809096	0.000156984	0.199526	0.0174621
Q9WTP6	KAD2	Adenylate kinase 2, mitochondrial	2.60615	0.0109601	0.197697	0.167808	0.49204	0.807726
Q7TMD7	DSG4	REVERSED Desmoglein-4	2.63027	0.330072	0.369828	0.40431	0.963829	0.760092
Q9QZR0	RNF25	E3 ubiquitin-protein ligase RNF25	2.63027	0.242502	0.654636	0.483738	1.7378	0.385478
Q8R0F6	ILKAP	Integrin-linked kinase-associated serine/threonine phosphatase 2C	2.63027	0.0369221	0.0432514	0.00775188	0.0954993	0.0926871
Q91YD9	WASL	Neural Wiskott-Aldrich syndrome protein	2.63027	0.125859	0.660694	0.787966	1.7378	0.503837
Q91X52	DCXR	REVERSED L-xylulose reductase	2.65461	0.451699	0.0398107	0.17068	0.0847227	0.244402
P11928	OAS1A	2'-5'-oligoadenylate synthase 1A	2.65461	0.241526	0.143219	0.126909	0.380189	0.247473
Q9R0H0	ACOX1	Peroxisomal acyl-coenzyme A oxidase 1	2.75423	0.242461	0.288403	0.129404	0.801678	0.377208
Q61704	ITIH3	Inter-alpha-trypsin inhibitor heavy chain H3	2.75423	0.458089	0.265461	0.232293	0.751623	0.378947
P35279-2	RAB6A	Isoform Rab6C of Ras-related protein Rab-6A	2.75423	0.00774299	0.169044	1.89396e-05	0.452898	0.000771628
P24549	AL1A1	Retinal dehydrogenase 1	2.77971	0.129497	0.0260615	0.00113962	0.047863	0.0013593
Q8C1B7	2016-09-11	Septin-11	2.80543	0.0680961	0.0831764	0.0719613	0.218776	0.234176
P55264	ADK	Adenosine kinase	2.80543	0.131795	0.340408	0.00464081	0.801678	0.00670198
Q9CVB6	ARPC2	Actin-related protein 2/3 complex subunit 2	2.83139	0.00518571	0.0724436	0.0442739	0.169044	0.364274
Q80ST9-2	LCA5	REVERSED Isoform 2 of Lebercilin	2.85759	0.258864	0.143219	0.17053	0.413047	0.412457
Q7TQH0-2	ATX2L	Isoform 2 of Ataxin-2-like protein	2.85759	0.00281735	0.515229	0.534392	1.30617	0.300689
Q99K85	SERC	Phosphoserine aminotransferase	2.85759	0.150226	0.0359749	0.0377177	0.0711213	0.717897
Q9CXE7	TMED5	Transmembrane emp24 domain-containing protein 5	2.85759	0.225446	0.474242	0.30941	1.36773	0.565864
P47963	RL13	60S ribosomal protein L13	2.88403	0.31596	0.496592	0.437873	1.27057	0.941349
Q91VE0	S27A4	Long-chain fatty acid transport protein 4	2.88403	0.274654	0.220801	0.255581	0.625173	0.884577
Q07797	LG3BP	Galectin-3-binding protein	2.91072	0.333859	0.580764	0.794057	1.72187	0.436163
Q3TCN2-2	PLBL2	Isoform 2 of Putative phospholipase B-like 2	2.91072	0.358636	0.0313329	0.186426	0.060256	0.333109
P08030	APT	Adenine phosphoribosyltransferase	2.93765	0.327209	0.0937562	0.415496	0.251189	0.723963
Q9R1T2	SAE1	REVERSED SUM	2.96483	0.312668	0.21677	0.240956	0.591562	0.635318
Q9R1P0	PSA4	Proteasome subunit alpha type-4	2.99226	0.00243696	0.0544503	0.000701024	0.144544	0.133012
P99026	PSB4	Proteasome subunit beta type-4	3.01995	0.0864596	0.0758578	0.00367708	0.231207	0.0186619
P28474	ADHX	Alcohol dehydrogenase class-3	3.13329	0.436072	0.343558	0.0183822	1.07647	0.201276
Q60974-2	NCOR1	Isoform 2 of Nuclear receptor corepressor 1	3.16228	0.212579	0.37325	0.0740399	1.08643	0.238552
Q62465	VAT1	Synaptic vesicle membrane protein VAT-1 homolog	3.16228	0.359777	0.0554626	0.00222084	0.149969	0.00961165
P07758	A1AT1	Alpha-1-antitrypsin 1-1	3.19154	0.355359	0.487529	0.541639	1.40605	0.688759
Q6PGC1	DHX29	ATP-dependent RNA helicase Dhx29	3.22107	0.205234	0.313329	0.444216	1.01859	0.322667
Q6PDQ2	CHD4	Chromodomain-helicase-DNA-binding protein 4	3.25087	0.103534	0.195884	0.556687	0.613762	0.652852
Q9EQU5-2	SET	Isoform TAF-I beta of Protein SET	3.25087	0.218723	0.263027	0.0523569	0.801678	0.735862
Q922Q8	LRC59	Leucine-rich repeat-containing protein 59	3.31131	0.148433	0.416869	0.585547	1.33045	0.672247
P21614	VTDB	Vitamin D-binding protein	3.34195	0.646067	0.310456	0.723963	1.15878	0.900022
Q3B7Z2-2	OSBP1	Isoform 2 of	3.34195	0.413577	0.597035	0.389814	1.94089	0.654371
Q00623	APOA1	Apolipoprotein A-I	3.56451	0.00451945	0.570164	0.655754	2.10863	0.0488779
Q00623	APOA1	Apolipoprotein A-I	3.56451	0.00451945	0.570164	0.655754	2.10863	0.0488779
P70694	DHB5	Estradiol 17 beta-dehydrogenase 5	3.66438	0.119734	0.114815	0.0545706	0.394457	0.277042
Q3ULD5	MCCB	Methylcrotonoyl-CoA carboxylase beta chain, mitochondrial	3.69828	0.329889	0.175388	0.21089	0.564937	0.45467
Q91WR5	AK1CL	Aldo-keto reductase family 1 member C21	3.7325	0.215838	0.0280543	0.040197	0.0698232	0.0489466
P28667	MRP	MARCKS-related protein	3.76704	0.158594	0.461318	0.0720824	1.70608	0.318144
Q9CWS0	DDAH1	N(G),N(G)-dimethylarginine dimethylaminohydrolase 1	3.80189	0.184815	0.564937	0.321063	1.94089	0.927556
Q8BWF0	SSDH	Succinate-semialdehyde dehydrogenase, mitochondrial	4.01791	0.216798	0.0570164	0.0436549	0.205116	0.104434
Q8VE37	RCC1	Regulator of chromosome condensation	4.01791	0.137194	0.346737	0.615875	1.55597	0.479098
Q91ZJ5	UGPA	UTP--glucose-1-phosphate uridylyltransferase	4.01791	0.00684512	0.185353	0.0139483	0.672977	0.234645
P09542	MYL3	Myosin light chain 3	4.20727	0.314449	0.356451	0.397311	1.49969	0.721083
Q8BGV0	SYNM	Probable asparaginyl-tRNA synthetase, mitochondrial	4.20727	0.240314	0.0428548	0.146122	0.109648	0.32926
73		gi|27807487|ref|NP_777193.1| serine (or cysteine) proteinase inhibitor, clade A (alpha-1 antiproteinase, antitrypsin), member 3 [Bos taurus (contaminant)]	4.40555	0.0325441	0.0613762	0.00869704	0.222843	0.990305
Q07456	AMBP	Protein AMBP	4.40555	0.615614	0.353183	0.862293	1.64437	0.530161
Q9D0R2	SYTC	Threonyl-tRNA synthetase, cytoplasmic	4.52898	0.00283135	0.113763	0.0873249	0.465586	0.900723
Q9CQA5	MED4	Mediator of RNA polymerase II transcription subunit 4	4.61318	0.0784152	0.0444631	0.0222232	0.157036	0.0835835
P84091	AP2M1	AP-2 complex subunit mu	4.74242	0.825965	0.136773	0.33674	0.751623	0.296287
P70429	EVL	Ena/VASP-like protein	4.74242	0.112639	0.420727	0.359199	1.94089	0.263173
Q9D7H3	RTC1	RNA 3'-terminal phosphate cyclase	4.74242	0.315316	0.0711213	0.256797	0.270396	0.708913
Q9JIK5	DDX21	Nucleolar RNA helicase 2	5.15229	0.00522729	0.420727	0.0325926	2.22844	0.635632
Q8BKC5-2	IPO5	Isoform 2 of Importin-5	5.15229	0.218617	0.0529663	0.134465	0.275423	0.25403
Q3UKU1	ELL2	RNA polymerase II elongation factor ELL2	5.19996	0.147379	0.570164	0.394852	3.01995	0.215384
Q8CJ53-4	CIP4	Isoform 4 of Cdc42-interacting protein 4	5.34564	0.335247	0.0724436	0.0491108	0.270396	0.0566046
P11247	PERM	Myeloperoxidase	5.49541	0.503737	0.549541	0.704352	2.91072	0.376446
Q00898	A1AT5	Alpha-1-antitrypsin 1-5	6.19441	0.00626443	0.369828	0.865471	2.03236	0.180614
Q8K0E8	FIBB	Fibrinogen beta chain	6.19441	0.0554682	0.654636	0.96902	4.52898	0.0538724
P01027	CO3	Complement C3	6.54636	5.1932e-05	0.343558	0.020225	2.33346	0.0426253
P97864	CASP7	Caspase-7	6.60694	0.073223	0.416869	0.706752	2.63027	0.387062
O35744	CH3L3	Chitinase-3-like protein 3	6.98232	0.102167	0.409261	0.141513	2.93765	0.657151
P29699	FETUA	Alpha-2-HS-glycoprotein	6.98232	0.000480677	0.613762	0.936109	4.32514	0.00314237
P07724	ALBU	Serum albumin	7.24436	1.13021e-07	0.469894	0.066549	3.43558	8.98663e-05
P13634	CAH1	Carbonic anhydrase 1	7.44732	0.00112321	0.465586	0.0679347	3.56451	0.306556
Q9CWX9	DDX47	Probable ATP-dependent RNA helicase DDX47	8.09096	0.108265	0.597035	0.415128	4.92039	0.138802
Q9D773	RM02	39S ribosomal protein L2, mitochondrial	8.47227	0.420816	0.0928966	0.143521	0.717794	0.200192
O88512	AP1G2	AP-1 complex subunit gamma-like 2	8.95365	0.486218	0.092045	0.584848	0.963829	0.825779
P07759	SPA3K	Serine protease inhibitor A3K	9.2045	0.00201284	0.529663	0.461021	4.61318	0.0164504
Q60590	A1AG1	Alpha-1-acid glycoprotein 1	10.1859	0.0485696	0.496592	0.247049	5.34564	0.110539
P58468	CU070	Uncharacterized protein C21orf70 homolog	12.3595	0.191526	0.363078	0.434589	4.44631	0.296046
Q64674	SPEE	Spermidine synthase	12.5892	0.0910979	0.0642688	0.0596042	0.801678	0.0786224
Q8VCM7	FIBG	Fibrinogen gamma chain	15.5597	0.0860113	0.170608	0.270272	3.87258	0.509414
Q921I1	TRFE	Serotransferrin	15.5597	2.23969e-10	0.549541	0.0329971	9.0365	9.31947e-05
Q91X72	HEMO	Hemopexin	26.0615	3.95121e-07	0.666807	0.853684	19.9526	5.96162e-08
Q61646	HPT	Haptoglobin	36.3078	0.00473798	0.316228	3.89881e-05	17.8649	0.0806174
P07361	A1AG2	Alpha-1-acid glycoprotein 2	41.3047	0.000173838	0.349945	0.329244	22.4905	0.0013076
Q8R1M8	MPTX	Mucosal pentraxin	0.0246604	0.0898705	1.52757	0.392745	0.0432514	0.111973
Q8JZN5	ACAD9	Acyl-CoA dehydrogenase family member 9, mitochondrial	0.0301995	0.302499	12.942	0.343406	0.758578	0.830182
P16015	CAH3	Carbonic anhydrase 3	0.0465586	8.66378e-06	9.0365	0.00276994	0.436516	0.119944
P04117	FABP4	Fatty acid-binding protein, adipocyte	0.0554626	0.0018268	7.72681	0.030339	0.420727	0.279377
Q7TQD2	TPPP	Tubulin polymerization-promoting protein	0.0586138	0.000525855	1.94089	0.0197053	0.128233	0.144681
Q8CGP7	H2A1K	Histone H2A type 1-K	0.0597035	0.0298602	23.1206	0.0263393	2.10863	0.214705
Q9ERL7	GMFG	Glia maturation factor gamma	0.0717794	0.100317	20.5116	0.0743466	1.99526	0.268322
P47915	RL29	60S ribosomal protein L29	0.0751623	0.000228921	5.44503	0.0911411	0.428549	0.0813276
Q8K2T1	NMRL1	NmrA-like family domain-containing protein 1	0.0809096	0.24479	5.86138	0.585176	0.428549	0.337122
P62806	H4	Histone H4	0.0847227	5.25655e-05	2.42103	0.248398	0.201372	0.000691684
Q6ZWY9	H2B1C	Histone H2B type 1-C/E/G	0.092045	0.00764637	1.72187	0.852995	0.172187	0.00581035
Q64695	EPCR	Endothelial protein C receptor	0.0954993	0.105578	20.3236	0.0822332	1.94089	0.334608
129	Keratin 10	trm|Q8N175| Keratin 10 [Homo sapiens (contaminant)]	0.0981748	0.0308862	99.0832	0.0273803	2.77971	0.230431
Q9D7Z6	CLCA1	Calcium-activated chloride channel regulator 1	0.101859	7.59392e-14	2.0893	0.000202737	0.210863	2.763e-05
Q9CRB6	TPPP3	Tubulin polymerization-promoting protein family member 3	0.108643	0.00012267	2.85759	0.123554	0.313329	0.00216571
O08832	GALT4	Polypeptide N-acetylgalactosaminyltransferase 4	0.11272	0.0338524	6.08135	0.0183341	1.47231	0.185242
Q08189	TGM3	Protein-glutamine gamma-glutamyltransferase E	0.114815	0.00110434	2.46604	0.22521	0.346737	0.153024
P31001	DESM	Desmin	0.118032	7.23865e-14	1.80302	0.00220818	0.237684	6.71019e-06
Q9D1C3	PREY	Protein preY, mitochondrial	0.122462	0.420123	15.2757	0.0653072	1.99526	0.113304
Q3UZP0	MALD2	MARVEL domain-containing protein 2	0.124738	0.0379807	21.0863	0.0345787	1.90546	0.346722
Q9CQC2	COL	Colipase	0.127057	0.23591	29.3765	0.0975722	5.70164	0.159812
Q04857	CO6A1	Collagen alpha-1(VI) chain	0.12942	0.000146301	4.65586	0.058107	0.660694	0.423733
P20060	HEXB	Beta-hexosaminidase subunit beta	0.12942	0.124543	4.83059	0.107602	0.711214	0.836067
Q9D8I1	PERP1	Plasma cell-induced resident endoplasmic reticulum protein	0.12942	0.0646941	5.01187	0.10443	0.679204	0.466709
P14602	HSPB1	Heat shock protein beta-1	0.138038	0.0314931	3.69828	0.0170419	0.549541	0.962173
Q91W90	TXND5	Thioredoxin domain-containing protein 5	0.143219	0.000207103	1.95885	0.702752	0.301995	0.00957542
Q9R1Q7	PLP2	Proteolipid protein 2	0.143219	0.437378	2.46604	0.635934	0.340408	0.667616
P61750	ARF4	ADP-ribosylation factor 4	0.149969	0.364441	2.29087	0.796645	0.380189	0.436872
P83882	RL36A	60S ribosomal protein L36a	0.151356	0.063804	12.5892	0.0266668	2.31206	0.155106
P63254	CRIP1	Cysteine-rich protein 1	0.152757	0.00912614	3.31131	0.105537	0.49204	0.712577
Q8BK30	NDUV3	NADH dehydrogenase [ubiquinone] flavoprotein 3, mitochondrial	0.152757	0.090867	3.01995	0.0477809	0.519996	0.766452
O70423-2	AOC3	Isoform 2 of Membrane primary amine oxidase	0.155597	0.0705267	2.35505	0.037764	0.432514	0.696873
Q3U0V2	TRADD	Tumor necrosis factor receptor type 1-associated DEATH domain protein	0.155597	0.236331	8.87156	0.189075	1.70608	0.611811
O88851	RBBP9	Putative hydrolase RBBP9	0.161436	0.335584	9.63829	0.201848	1.83654	0.410532
Q99N84	RT18B	28S ribosomal protein S18b, mitochondrial	0.16293	0.299283	7.94328	0.172182	2.0893	0.348815
Q9DCT6	CQ049	MLL1/MLL complex subunit C17orf49 homolog	0.167494	0.0379139	22.9087	0.0348594	1.90546	0.379714
P62855	RS26	40S ribosomal protein S26	0.169044	0.176075	3.37287	0.394218	0.586138	0.430672
P52840	ST1A1	Sulfotransferase 1A1	0.178649	0.0297447	2.31206	0.150004	0.440555	0.0772434
P21550	ENOB	Beta-enolase	0.185353	0.232348	1.75388	0.353188	0.376704	0.498877
Q9JL27	FUT2	Galactoside 2-alpha-L-fucosyltransferase 2	0.185353	0.283328	4.40555	0.276912	0.981748	0.964669
Q9DCN2	NB5R3	NADH-cytochrome b5 reductase 3	0.190546	0.369417	2.48886	0.586172	0.416869	0.748047
135	keratin 1	cra|hCP1609934.2| keratin 1 (epidermolytic hyperkeratosis) [Homo sapiens (contaminant)]	0.194089	0.000439622	2.85759	0.0435635	0.539511	0.219968
Q9DB20	ATPO	ATP synthase subunit	0.199526	0.0237123	1.7378	0.249098	0.363078	0.128572
P62774	MTPN	Myotrophin	0.199526	0.0774676	4.16869	0.00233065	0.903649	0.315302
P09541	MYL4	Myosin light chain 4	0.199526	0.240046	4.36516	0.0935017	1	0.300862
Q9D939	ST1C2	Sulfotransferase 1C2	0.199526	0.0813394	3.43558	0.104269	0.679204	0.685631
Q9CR61	NDUB7	NADH dehydrogenase [ubiquinone] 1 beta subcomplex subunit 7	0.207014	0.159021	2.208	0.423606	0.444631	0.23007
Q9CQX2	CYB5B	Cytochrome b5 type B	0.20893	0.0890742	4.61318	0.0642638	1.02802	0.593339
Q8VHC3	SELM	Selenoprotein M	0.20893	0.0349604	2.85759	0.216118	0.597035	0.231601
Q9JKK7	TMOD2	Tropomodulin-2	0.20893	0.156945	6.25173	0.133191	1.31826	0.596074
Q9D6J5	NDUB8	NADH dehydrogenase [ubiquinone] 1 beta subcomplex subunit 8, mitochondrial	0.210863	0.389537	4.13048	0.397514	0.895365	0.976258
Q8CGN5	PLIN1	Perilipin-1	0.212814	0.463642	3.80189	0.515127	0.801678	0.894218
Q8R2M2	TDIF2	Deoxynucleotidyltransferase terminal-interacting protein 2	0.214783	0.270531	3.87258	0.2413	1.01859	0.813941
Q6ZWV7	RL35	60S ribosomal protein L35	0.214783	0.0446062	2.0893	0.182332	0.457088	0.598456
P52196	THTR	Thiosulfate sulfurtransferase	0.21677	0.0117378	2.67917	0.307288	0.636796	0.348933
O35459	ECH1	Delta(3,5)-Delta(2,4)-dienoyl-CoA isomerase, mitochondrial	0.218776	0.278578	4.20727	0.319801	0.937562	0.804486
Q9ERS2	NDUAD	NADH dehydrogenase [ubiquinone] 1 alpha subcomplex subunit 13	0.226986	0.00663821	4.05509	0.0539255	0.928966	0.38031
Q9D7S7	RL22L	60S ribosomal protein L22-like 1	0.231207	0.227995	3.16228	0.472806	0.704693	0.489199
Q8BHN3	GANAB	Neutral alpha-glucosidase AB	0.235505	0.0153095	1.85353	0.237448	0.444631	0.438853
P70349	HINT1	Histidine triad nucleotide-binding protein 1	0.237684	0.00152731	1.80302	0.0698292	0.469894	0.447683
P43274	H14	Histone H1.4	0.239883	0.1503	1.59956	0.53744	0.383707	0.0533838
Q9CPP6	NDUA5	NADH dehydrogenase [ubiquinone] 1 alpha subcomplex subunit 5	0.239883	0.00460935	1.55597	0.306577	0.390841	0.0565168
Q68FD5	CLH	Clathrin heavy chain 1	0.246604	1.30571e-06	1.88799	3.76727e-05	0.496592	0.669751
Q9Z1Y4	TRIP6	Thyroid receptor-interacting protein 6	0.248886	0.121329	8.55067	0.003522	2.44343	0.0621946
P43024	CX6A1	Cytochrome c oxidase subunit 6A1, mitochondrial	0.251189	0.407631	1.64437	0.4123	0.448745	0.987047
Q05793	PGBM	Basement membrane-specific heparan sulfate proteoglycan core protein	0.251189	8.71288e-05	2.72898	0.12617	0.717794	0.121486
Q64191	ASPG	N(4)-(beta-N-acetylglucosaminyl)-L-asparaginase	0.253513	0.0876756	10.1859	0.00354027	2.53513	0.261348
P24527	LKHA4	Leukotriene A-4 hydrolase	0.258226	0.0697915	3.19154	0.301262	0.912011	0.72745
P99028	QCR6	Cytochrome b-c1 complex subunit 6, mitochondrial	0.260615	0.0125233	1.90546	0.245635	0.505825	0.462642
P10649	GSTM1	Glutathione S-transferase Mu 1	0.263027	0.0906806	1.80302	0.13325	0.501187	0.66825
Q9D0S9	HINT2	Histidine triad nucleotide-binding protein 2, mitochondrial	0.263027	0.0214234	1.90546	0.0274915	0.519996	0.872692
O35143	ATIF1	ATPase inhibitor, mitochondrial	0.265461	0.0926614	2.44343	0.211104	0.660694	0.955648
Q5NCR9	CCD55	Coiled-coil domain-containing protein 55	0.267917	0.216797	14.4544	0.053158	3.80189	0.140225
Q8BMD8	SCMC1	Calcium-binding mitochondrial carrier protein SCaMC-1	0.267917	0.0571696	4.52898	0.0327937	1.2942	0.505966
Q921X9	PDIA5	Protein disulfide-isomerase A5	0.270396	0.0390267	2.88403	0.0579465	0.787046	0.370117
Q8BTY2-2	S4A7	Isoform 2 of Sodium bicarbonate cotransporter 3	0.270396	0.19511	2.55859	0.22317	0.711214	0.744014
Q5EBG8	CA050	Uncharacterized protein C1orf50 homolog	0.275423	0.572988	4.57088	0.355933	1.38038	0.653221
Q60829	PPR1B	Protein phosphatase 1 regulatory subunit 1B	0.277971	0.00776871	5.01187	2.28172e-05	1.61436	0.193529
P15261	INGR1	Interferon gamma receptor 1	0.280543	0.503792	2.67917	0.681195	0.787046	0.735665
P62984	RL40	60S ribosomal protein L40	0.283139	0.796844	1.55597	0.925438	0.452898	0.866549
Q9CPQ1	COX6C	Cytochrome c oxidase subunit 6C	0.285759	0.0455066	2.33346	0.00981001	0.666807	0.72987
Q9CPQ8	ATP5L	ATP synthase subunit g, mitochondrial	0.288403	0.445522	2.65461	0.274848	0.765597	0.505501
O88569	ROA2	Heterogeneous nuclear ribonucleoproteins A2/B1	0.288403	0.003126	1.7378	0.846894	0.544503	0.0847874
Q5SUC9	SCO1	Protein SC	0.291072	0.511967	3.22107	0.458718	0.928966	0.889216
P29758	OAT	rnithine aminotransferase, mitochondrial	0.291072	0.0219379	4.61318	0.0242654	1.2942	0.641301
P45878	FKBP2	Peptidyl-prolyl cis-trans isomerase FKBP2	0.291072	0.0631168	2.07014	0.976416	0.613762	0.213485
P09528	FRIH	Ferritin heavy chain	0.293765	0.00886885	1.90546	0.350217	0.554626	0.269143
Q60604	ADSV	Adseverin	0.296483	0.093702	1.5417	0.153335	0.413047	0.541047
Q921U8	SMTN	Smoothelin	0.299226	3.58744e-06	1.92309	0.0287703	0.60256	0.227856
A2A8Z1-2	OSBL9	Isoform 2 of	0.299226	0.496652	7.44732	0.266838	2.35505	0.433602
P56388-2	CART	Isoform Short of Cocaine- and amphetamine-regulated transcript protein	0.301995	0.201882	1.67494	0.407539	0.510505	0.337795
Q02788	CO6A2	Collagen alpha-2(VI) chain	0.301995	0.0572808	2.91072	0.0270712	0.855067	0.814576
Q99KE1	MAOM	NAD-dependent malic enzyme, mitochondrial	0.30761	0.0517801	3.43558	0.0334261	1.05682	0.723871
Q62009-5	POSTN	Isoform 5 of Periostin	0.310456	0.0013379	2.35505	0.0647001	0.704693	0.523681
P70271	PDLI4	PDZ and LIM domain protein 4	0.313329	0.0835168	4.32514	0.0489216	1.48594	0.518879
Q9CYS6	CB072	Uncharacterized protein C2orf72 homolog	0.313329	0.455105	1.99526	0.603251	0.660694	0.739728
Q9CR62	M2OM	Mitochondrial 2-oxoglutarate/malate carrier protein	0.316228	0.299421	2.12814	0.432395	0.660694	0.599222
Q9CYA0	CREL2	Cysteine-rich with EGF-like domain protein 2	0.319154	0.333872	3.49945	0.142735	1.0666	0.472789
Q99JW5	EPCAM	Epithelial cell adhesion molecule	0.319154	0.00588118	3.19154	0.00446881	0.990832	0.680188
Q3TR54	GSDC4	Gasdermin-C4	0.319154	0.13164	3.69828	0.100298	1.1272	0.703727
P19783	COX41	Cytochrome c oxidase subunit 4 isoform 1, mitochondrial	0.319154	0.00112714	1.8197	0.0724698	0.570164	0.0205838
Q9CRC3	CO040	UPF0235 protein C15orf40 homolog	0.322107	0.359056	5.64937	0.305371	2.42103	0.790547
Q91VC7	PP14A	Protein phosphatase 1 regulatory subunit 14A	0.325087	0.11429	6.42688	0.0262248	2.24905	0.250373
Q3URD3-4	SLMAP	Isoform 4 of Sarcolemmal membrane-associated protein	0.325087	0.0159994	2.85759	0.00761488	0.937562	0.95925
Q3UQN2-3	FCHO2	Isoform 3 of FCH domain only protein 2	0.328095	0.394049	2.83139	0.393171	0.928966	0.997386
P47212	GALA	Galanin	0.328095	0.429244	1.65959	0.622853	0.544503	0.666272
P43275	H11	Histone H1.1	0.328095	0.0109828	3.22107	0.000933744	1.0666	0.131633
Q3UMT1	PP12C	Protein phosphatase 1 regulatory subunit 12C	0.328095	0.0013937	3.10456	1.32107e-05	1.07647	0.131931
P26339	CMGA	Chromogranin-A	0.331131	0.000376138	1.52757	0.00384192	0.554626	0.709005
Q9D0M3	CY1	Cytochrome c1, heme protein, mitochondrial	0.331131	0.0979198	2.208	0.571397	0.765597	0.355457
Q8R0W0	EPIPL	Epiplakin	0.331131	3.04946e-05	3.16228	4.60721e-08	1.09648	0.032424
Q9D338	RM19	39S ribosomal protein L19, mitochondrial	0.331131	0.22422	1.59956	0.73866	0.515229	0.197976
Q9CQJ8	NDUB9	NADH dehydrogenase [ubiquinone] 1 beta subcomplex subunit 9	0.331131	0.304552	3.04789	0.266643	1.01859	0.889775
Q8R2Y8	PTH2	Peptidyl-tRNA hydrolase 2, mitochondrial	0.331131	0.614864	3.19154	0.510993	1.08643	0.829396
A2A863-2	ITB4	Isoform 2 of Integrin beta-4	0.334195	0.0380147	1.69044	0.232772	0.636796	0.733116
Q9CQ62	DECR	2,4-dienoyl-CoA reductase, mitochondrial	0.340408	0.0336565	2.35505	0.054333	0.744732	0.673817
P97384	ANX11	Annexin A11	0.340408	0.0520271	1.64437	0.87915	0.539511	0.0487881
P01831	THY1	Thy-1 membrane glycoprotein	0.340408	0.359115	1.72187	0.353238	0.544503	0.979141
Q9JHU4	DYHC1	Cytoplasmic dynein 1 heavy chain 1	0.346737	0.0491753	2.05116	0.0732076	0.751623	0.95911
Q9NYQ2	HAOX2	Hydroxyacid oxidase 2	0.346737	0.441766	2.83139	0.549934	0.912011	0.786956
Q8K039	K1143	Uncharacterized protein KIAA1143 homolog	0.346737	0.18827	3.53183	0.124429	1.1695	0.327587
Q6ZQK5-2	ACAP2	Isoform 2 of Arf-GAP with coiled-coil, ANK repeat and PH domain-containing protein 2	0.349945	0.258207	2.39883	0.104442	0.879022	0.328327
Q9D3P8	CI046	Transmembrane protein C9orf46 homolog	0.349945	0.402685	6.08135	0.250888	2.18776	0.487373
O88207	CO5A1	Collagen alpha-1(V) chain	0.353183	0.229996	1.64437	0.41786	0.586138	0.406262
Q80TH2-1	LAP2	Isoform 1 of Protein LAP2	0.353183	0.200044	3.56451	0.0789782	1.2942	0.677448
Q9DCV7	K2C7	Keratin, type II cytoskeletal 7	0.356451	0.0062101	1.95885	0.176045	0.751623	0.482451
Q8BHD7-2	ROD1	Isoform 2 of Regulator of differentiation 1	0.356451	0.166507	2.65461	0.584532	1.00925	0.722864
Q8VCN5	CGL	Cystathionine gamma-lyase	0.359749	0.0428559	1.52757	0.487672	0.549541	0.275766
P19096	FAS	Fatty acid synthase	0.366438	0.00229505	2.88403	0.00892118	1.09648	0.766512
Q8VHX6-2	FHC	Ferritin heavy chain	0.366438	0.000475508	2.99226	0.000831179	1.08643	0.353164
Q8BRN9	C2D1B	Coiled-coil and C2 domain-containing protein 1B	0.369828	0.417378	5.29664	0.0807365	1.94089	0.196163
Q9D6U8	F162A	Protein FAM162A	0.369828	0.0863762	2.75423	0.218594	0.972747	0.999084
P51174	ACADL	Long-chain specific acyl-CoA dehydrogenase, mitochondrial	0.37325	0.0760477	1.58489	0.439566	0.580764	0.299801
Q9R0Y5	KAD1	Adenylate kinase isoenzyme 1	0.37325	0.132559	1.94089	0.483002	0.724436	0.589109
Q9JK53	PRELP	Prolargin	0.37325	0.18864	1.69044	0.350749	0.630957	0.417063
Q9CQR2	RS21	40S ribosomal protein S21	0.380189	0.0556208	2.05116	0.458258	0.862979	0.673365
Q3UMR5	C109A	Coiled-coil domain-containing protein 109A	0.383707	0.255633	2.93765	0.166425	1.1272	0.633197
Q9WTR5	CAD13	Cadherin-13	0.383707	0.180814	1.67494	0.184654	0.613762	0.98504
Q7TSJ2-2	MAP6	Isoform Early ST	0.387258	0.30894	3.16228	0.260416	1.23595	0.509314
Q9JHC0	GPX2	Glutathione peroxidase 2	0.394457	0.114519	1.94089	0.25329	0.724436	0.484237
P84104	SFRS3	Splicing factor, arginine/serine-rich 3	0.398107	0.841802	2.77971	0.769428	1.1272	0.908466
Q5SRX1	TM1L2	M1-like protein 2	0.401791	0.0584895	2.24905	0.128972	0.903649	0.815885
P50114	S100B	Protein S100-B	0.401791	0.544555	2.26987	0.519581	0.912011	0.954674
Q8VCW8	ACSF2	Acyl-CoA synthetase family member 2, mitochondrial	0.405508	0.0100089	3.76704	0.00282532	1.48594	0.550706
P70695	F16P2	Fructose-1,6-bisphosphatase isozyme 2	0.405508	0.249058	2.51189	0.115607	1	0.802069
P53994	RAB2A	Ras-related protein Rab-2A	0.405508	0.197654	2.48886	0.195946	1.02802	0.991924
Q08879	FBLN1	Fibulin-1	0.409261	0.212934	4.05509	0.077973	1.88799	0.258296
P43276	H15	Histone H1.5	0.409261	0.0166683	3.66438	0.00482523	1.59956	0.253745
Q62000	MIME	Mimecan	0.413047	0.0778992	2.18776	0.010533	0.895365	0.237662
Q8R164	BPHL	Valacyclovir hydrolase	0.413047	0.434047	2.53513	0.416461	1.1272	0.954224
O35643	AP1B1	AP-1 complex subunit beta-1	0.416869	0.0790249	1.5417	0.0563304	0.636796	0.561326
P09813	APOA2	Apolipoprotein A-II	0.416869	0.480491	2.37684	0.549782	0.981748	0.869094
P15626	GSTM2	Glutathione S-transferase Mu 2	0.416869	0.00962556	1.95885	0.132064	0.847227	0.56252
Q61292	LAMB2	Laminin subunit beta-2	0.416869	0.123452	1.90546	0.0218959	0.772681	0.467935
P35822	PTPRK	Receptor-type tyrosine-protein phosphatase kappa	0.416869	0.406452	4.7863	0.31192	2.0893	0.690971
Q9CR50	ZN363	RING finger and CHY zinc finger domain-containing protein 1	0.420727	0.272919	3.90841	0.177248	1.65959	0.41497
O35943	FRDA	Frataxin, mitochondrial	0.42462	0.136656	2.29087	0.248169	0.92045	0.717454
Q91WG8	GLCNE	Bifunctional UDP-N-acetylglucosamine 2-epimerase/N-acetylmannosamine kinase	0.42462	0.0247017	2.55859	0.0935523	1.10662	0.681706
Q6P6L0-3	FIL1L	Isoform 3 of Filamin A-interacting protein 1-like	0.42462	0.144853	3.98107	0.00328912	1.95885	0.0714471
Q80VJ3	RCL	Deoxyribonucleoside 5'-monophosphate N-glycosidase	0.42462	0.30654	1.99526	0.409526	0.862979	0.665493
Q7TN98-3	CPEB4	Isoform mCPEB-4c of Cytoplasmic polyadenylation element-binding protein 4	0.428549	0.277314	2.96483	0.218538	1.28233	0.633444
Q8VCR7	ABHEB	Abhydrolase domain-containing protein 14B	0.428549	0.07699	4.13048	0.00181096	1.78649	0.0669332
O89086	RBM3	Putative RNA-binding protein 3	0.428549	0.0824984	4.2462	0.537347	1.90546	0.43662
P28653	PGS1	Biglycan	0.436516	0.0251663	1.72187	0.0116567	0.737904	0.582666
O89029-2	MATN4	Isoform Short of Matrilin-4	0.440555	0.285318	2.72898	0.234236	1.21339	0.697613
Q9CPW3	RM54	39S ribosomal protein L54, mitochondrial	0.440555	0.365032	1.70608	0.567752	0.698232	0.675908
Q8R010	AIMP2	Aminoacyl tRNA synthase complex-interacting multifunctional protein 2	0.444631	0.356123	2.83139	0.248748	1.22462	0.558765
Q9QXT0	CNPY2	Protein canopy homolog 2	0.444631	0.0807458	1.57036	0.453923	0.698232	0.517427
Q9DCT8	CRIP2	Cysteine-rich protein 2	0.444631	0.0952337	1.77011	0.309906	0.77983	0.380673
Q9QZS3-3	NUMB	Isoform 71 kDa of Protein numb homolog	0.444631	0.212428	4.16869	0.0308963	1.99526	0.191392
Q6ZQM8	UD17C	UDP-glucuronosyltransferase 1-7C	0.444631	0.0286874	2.33346	0.115296	1.04713	0.306653
Q8C790	CG046	Uncharacterized protein C7orf46 homolog	0.444631	0.287856	2.37684	0.266565	1.0666	0.881558
Q8K4M5	COMD1	MM domain-containing protein 1	0.448745	0.292178	2.01372	0.320581	0.912011	0.869058
Q8R0Y6	FTHFD	10-formyltetrahydrofolate dehydrogenase	0.448745	0.0840982	1.95885	0.174738	0.83946	0.963759
Q8R5J9	PRAF3	PRA1 family protein 3	0.448745	0.475432	2.1677	0.387202	0.928966	0.782322
Q9DCH4	EIF3F	Eukaryotic translation initiation factor 3 subunit F	0.448745	0.225792	1.6293	0.353914	0.685488	0.472395
Q8VE88-2	F1142	Isoform 2 of Protein FAM114A2	0.448745	0.354376	2.63027	0.0385802	1.23595	0.456368
Q9JM14	NT5C	5'(3')-deoxyribonucleotidase, cytosolic type	0.448745	0.160047	2.63027	0.5319	1.19124	0.874705
P45952	ACADM	Medium-chain specific acyl-CoA dehydrogenase, mitochondrial	0.452898	0.0339919	1.97697	0.238093	0.879022	0.643892
P62331	ARF6	ADP-ribosylation factor 6	0.452898	0.320766	1.69044	0.26134	0.77983	0.713155
Q60766	IRGM	Immunity-related GTPase family M protein	0.452898	0.3451	1.88799	0.36833	0.855067	0.918133
P00688	AMYP	Pancreatic alpha-amylase	0.452898	0.336636	21.2814	0.0019637	14.0605	0.00277074
Q8K262	PLAC9	Placenta-specific protein 9	0.452898	0.944778	12.0226	0.191591	6.79204	0.186843
P23591	FCL	GDP-L-fucose synthase	0.457088	0.517807	2.70396	0.808648	1.27057	0.428183
Q9Z0M5	LICH	Lysosomal acid lipase/cholesteryl ester hydrolase	0.461318	0.668809	4.01791	0.209024	2.01372	0.254904
Q5EBG6	HSPB6	Heat shock protein beta-6	0.465586	0.196563	3.83707	0.102147	1.8197	0.432199
O55128	SAP18	Histone deacetylase complex subunit SAP18	0.465586	0.0983111	3.31131	0.0140665	1.6293	0.454143
Q9CQ40	RM49	39S ribosomal protein L49, mitochondrial	0.469894	0.218554	2.01372	0.159594	0.928966	0.58783
Q9CQX8	RT36	28S ribosomal protein S36, mitochondrial	0.469894	0.180772	3.19154	0.111574	1.57036	0.746169
Q80TZ9	RERE	Arginine-glutamic acid dipeptide repeats protein	0.469894	0.274647	3.87258	0.0932254	1.90546	0.331105
Q7TSG5	CA113	SH3 domain-containing protein C1orf113 homolog	0.469894	0.514187	1.61436	0.4597	0.737904	0.887263
Q80UY1	CI041	UPF0586 protein C9orf41 homolog	0.469894	0.307802	2.99226	0.209431	1.41906	0.492215
P49817	CAV1	Caveolin-1	0.474242	0.0630841	1.80302	0.0952037	0.847227	0.779236
P10493	NID1	Nidogen-1	0.474242	0.577622	3.80189	0.0219151	1.77011	0.131338
Q9JMD3	PCTL	PCTP-like protein	0.474242	0.285092	3.19154	0.122668	1.52757	0.372567
Q9CQ91	NDUA3	NADH dehydrogenase [ubiquinone] 1 alpha subcomplex subunit 3	0.47863	0.352147	1.52757	0.514162	0.737904	0.627241
P47955	RLA1	60S acidic ribosomal protein P1	0.47863	0.593762	2.70396	0.669564	1.30617	0.892599
P39054	DYN2	Dynamin-2	0.483059	0.26262	2.88403	0.254838	1.36773	0.97427
Q9QZQ8	H2AY	Core histone macro-H2A.1	0.487529	0.405702	1.72187	0.0710374	0.855067	0.26272
P15864	H12	Histone H1.2	0.487529	0.511177	2.37684	0.177224	1.15878	0.453047
Q8R035	ICT1	Peptidyl-tRNA hydrolase ICT1, mitochondrial	0.487529	0.05623	2.05116	0.0931396	0.946237	0.827167
Q91WK0-2	LRRF2	Isoform 2 of Leucine-rich repeat flightless-interacting protein 2	0.487529	0.158798	1.92309	0.103753	0.954993	0.755732
P20444	KPCA	Protein kinase C alpha type	0.487529	0.10922	3.0761	0.0725734	1.52757	0.538981
Q9DAW9	CNN3	Calponin-3	0.496592	0.062276	1.87068	0.0897382	0.946237	0.862552
Q62188	DPYL3	Dihydropyrimidinase-related protein 3	0.496592	0.0407053	2.99226	0.017112	1.51356	0.532524
P39749	FEN1	Flap endonuclease 1	0.496592	0.89519	3.19154	0.695956	1.69044	0.638113
Q3UWA6-2	GUC2C	Isoform 2 of Heat-stable enterotoxin receptor	0.501187	0.728208	5.59758	0.246504	2.65461	0.210914
Q9ERU9	RBP2	E3 SUM	0.501187	0.740185	6.08135	0.0108412	3.01995	0.0166384
Q5UAK0-4	MIER1	Isoform N2 beta of Mesoderm induction early response protein 1	0.501187	0.281501	3.59749	0.200254	1.85353	0.512546
P12961	7B2	Neuroendocrine protein 7B2	0.501187	0.303304	1.85353	0.334522	0.912011	0.62317
Q9CR02	CD043	UPF0534 protein C4orf43 homolog	0.501187	0.331618	1.94089	0.333845	0.981748	0.991063
P48771	CX7A2	Cytochrome c oxidase subunit 7A2, mitochondrial	0.505825	0.706811	3.63078	0.38929	1.99526	0.52304
Q99KX1	MLF2	Myeloid leukemia factor 2	0.505825	0.335112	2.18776	0.292253	1.11686	0.813184
Q8CI94	PYGB	REVERSED Glycogen phosphorylase, brain form	0.505825	0.906359	28.8403	0.117474	19.4089	0.120737
Q64378	FKBP5	Peptidyl-prolyl cis-trans isomerase FKBP5	0.510505	0.338636	2.60615	0.244981	1.34276	0.582309
Q8K114	INT9	Integrator complex subunit 9	0.510505	0.340317	2.39883	0.26617	1.23595	0.674156
P11835	ITB2	Integrin beta-2	0.510505	0.341397	1.64437	0.420527	0.847227	0.760247
Q9Z2Q5	RM40	39S ribosomal protein L40, mitochondrial	0.510505	0.890993	2.22844	0.430823	1.20226	0.121363
Q9D1H8	RM53	39S ribosomal protein L53, mitochondrial	0.510505	0.671801	4.28548	0.282881	2.46604	0.367827
Q8R0A5	TCAL3	Transcription elongation factor A protein-like 3	0.510505	0.0822201	1.70608	0.353001	0.928966	0.864782
Q8BVA4	LMOD1	Leiomodin-1	0.515229	0.249279	1.95885	0.0532661	1.04713	0.448803
Q3U1T9-4	DEN1B	Isoform 4 of DENN domain-containing protein 1B	0.519996	0.423643	2.77971	0.293662	1.47231	0.595333
Q8CBY0	GATCL	GatC-like protein	0.519996	0.708455	6.42688	0.298813	3.46737	0.378532
Q91X97	NCALD	Neurocalcin-delta	0.519996	0.0285091	1.88799	0.0319442	0.990832	0.251037
P97314	CSRP2	Cysteine and glycine-rich protein 2	0.524808	0.0985899	1.69044	0.252034	0.903649	0.733388
Q9DCI9	RM32	39S ribosomal protein L32, mitochondrial	0.524808	0.178752	2.33346	0.145146	1.30617	0.796175
Q99KK2	NEUA	N-acylneuraminate cytidylyltransferase	0.529663	0.45003	2.12814	0.50791	1.1695	0.907169
Q9WVH9	FBLN5	Fibulin-5	0.529663	0.408253	1.99526	0.415667	1.04713	0.979607
Q9JLB2	MPP5	MAGUK p55 subfamily member 5	0.529663	0.319475	1.77011	0.340497	0.946237	0.91479
P81117	NUCB2	Nucleobindin-2	0.529663	0.00479064	2.03236	0.014818	1.15878	0.581058
Q8K4L3	SVIL	Supervillin	0.529663	0.152895	1.67494	0.538636	0.895365	0.788905
Q6ZQ06	QN1	REVERSED Protein QN1 homolog	0.534564	0.361905	1.64437	0.420226	0.887156	0.827895
Q9CX60	LBH	Protein LBH	0.534564	0.69575	3.28095	0.370706	1.94089	0.499772
Q91VM9	IPYR2	Inorganic pyrophosphatase 2, mitochondrial	0.534564	0.0107229	1.75388	0.0235933	0.928966	0.785821
Q99LM2	CK5P3	CDK5 regulatory subunit-associated protein 3	0.539511	0.365795	1.59956	0.434957	0.879022	0.805142
Q3SXD3	HDDC2	HD domain-containing protein 2	0.539511	0.737648	2.37684	0.12256	1.21339	0.42467
Q8CAQ8-2	IMMT	Isoform 2 of Mitochondrial inner membrane protein	0.539511	0.0573593	2.24905	0.00174262	1.25892	0.131535
Q9CQE5	RGS10	Regulator of G-protein signaling 10	0.539511	0.421634	1.5417	0.375051	0.809096	0.89733
Q8C4B4	U119B	Protein unc-119 homolog B	0.539511	0.362858	1.97697	0.326545	1.07647	0.865005
Q9CPZ8	COXAM	X assembly mitochondrial protein homolog	0.539511	0.310233	2.10863	0.307951	1.22462	0.993959
Q9DCV4	RMD1	Regulator of microtubule dynamics protein 1	0.544503	0.370581	1.52757	0.466376	0.847227	0.75355
Q9WTX2	PRKRA	Interferon-inducible double stranded RNA-dependent protein kinase activator A	0.544503	0.432338	3.53183	0.0124394	2.03236	0.050944
Q91XF0	PNPO	Pyridoxine-5'-phosphate oxidase	0.544503	0.466345	2.70396	0.323595	1.55597	0.73138
Q5U458	DJC11	DnaJ homolog subfamily C member 11	0.549541	0.373058	1.99526	0.32572	1.10662	0.829528
Q9CQC7	NDUB4	NADH dehydrogenase [ubiquinone] 1 beta subcomplex subunit 4	0.549541	0.340784	2.01372	0.12377	1.09648	0.314456
Q8VCI0	PLBL1	Putative phospholipase B-like 1	0.549541	0.976611	3.94457	0.442222	2.26987	0.432805
Q99JW2	ACY1	Aminoacylase-1	0.554626	0.377627	1.64437	0.379549	0.928966	0.993875
P84443	CC21A	C-C motif chemokine 21a	0.554626	0.546572	2.93765	0.385328	1.8197	0.664522
Q9Z0E6	GBP2	Interferon-induced guanylate-binding protein 2	0.554626	0.970853	1.57036	0.460471	0.895365	0.478224
Q9Z2E1	MBD2	Methyl-CpG-binding domain protein 2	0.554626	0.14793	1.61436	0.531063	0.870964	0.981376
Q99P72	RTN4	Reticulon-4	0.559758	0.386152	2.12814	0.850049	1.18032	0.600653
P07214	SPRC	SPARC	0.564937	0.62346	5.05825	0.0327245	2.99226	0.0485085
Q9D020	5NT3	Cytosolic 5'-nucleotidase 3	0.564937	0.388169	2.07014	0.310518	1.18032	0.729022
O35295	PURB	Transcriptional activator protein Pur-beta	0.564937	0.719022	3.46737	0.218608	2.01372	0.318864
P10852	4F2	4F2 cell-surface antigen heavy chain	0.564937	0.388264	1.64437	0.421421	0.937562	0.906542
Q9CYR0	SSBP	Single-stranded DNA-binding protein, mitochondrial	0.564937	0.135064	1.58489	0.241803	0.903649	0.603984
P52927	HMGA2	High mobility group protein HMGI-C	0.570164	0.525698	3.83707	0.755894	2.31206	0.95266
Q64105	SPRE	Sepiapterin reductase	0.570164	0.27602	2.208	0.226153	1.25892	0.818151
Q923D2	BLVRB	Flavin reductase	0.57544	0.195636	2.48886	0.0368595	1.49969	0.421849
Q9Z0G9	CLD3	Claudin-3	0.57544	0.56148	2.12814	0.33412	1.23595	0.532156
Q9CPU2	NDUB2	NADH dehydrogenase [ubiquinone] 1 beta subcomplex subunit 2, mitochondrial	0.57544	0.39589	1.97697	0.326399	1.14815	0.768135
Q8K183	PDXK	Pyridoxal kinase	0.57544	0.17525	3.69828	0.0834836	1.99526	0.360031
P16460	ASSY	Argininosuccinate synthase	0.57544	0.688122	2.55859	0.287924	1.57036	0.0546679
P55088	AQP4	Aquaporin-4	0.580764	0.500847	2.39883	0.279111	1.41906	0.459661
Q9CQY2	F103A	Protein FAM103A1	0.580764	0.539754	2.48886	0.429976	1.57036	0.776639
P16014	SCG1	Secretogranin-1	0.580764	0.027511	1.72187	1.30075e-05	1.10662	0.0540167
Q8BYL4	SYYM	REVERSED Tyrosyl-tRNA synthetase, mitochondrial	0.580764	0.401211	1.83654	0.359842	1.07647	0.870835
P61953	GBG11	Guanine nucleotide-binding protein G(I)/G(S)/G(	0.586138	0.859731	4.74242	0.300963	2.91072	0.273878
Q9CQQ7	AT5F1	ATP synthase subunit b, mitochondrial	0.586138	0.0539604	1.85353	0.0115252	1.10662	0.645111
P70403	CASP	Protein CASP	0.586138	0.604154	3.13329	0.318163	1.80302	0.465455
Q8BIF9	ZN787	Zinc finger protein 787	0.586138	0.403246	2.53513	0.31459	1.57036	0.707659
Q9D8S9	BOLA1	BolA-like protein 1	0.591562	0.0877484	1.65959	0.0566175	0.981748	0.800663
Q61400	CEAMA	Carcinoembryonic antigen-related cell adhesion molecule 10	0.591562	0.358415	2.53513	0.309112	1.48594	0.881634
P54869	HMCS2	Hydroxymethylglutaryl-CoA synthase, mitochondrial	0.591562	0.249492	1.90546	0.0624679	1.1695	0.457991
Q9QXP6	MKRN1	REVERSED E3 ubiquitin-protein ligase makorin-1	0.591562	0.412584	3.43558	0.194833	2.03236	0.316317
Q9D727	CF226	Uncharacterized protein C6orf226 homolog	0.591562	0.613079	2.75423	0.422292	1.75388	0.663482
Q9D8S3	ARFG3	ADP-ribosylation factor GTPase-activating protein 3	0.597035	0.606947	2.03236	0.0258869	1.28233	0.152766
Q3UHX9	CI114	Uncharacterized protein C9orf114 homolog	0.597035	0.418002	2.24905	0.284743	1.34276	0.575497
Q99JX3	GORS2	Golgi reassembly-stacking protein 2	0.597035	0.276823	1.6293	0.584585	0.937562	0.844819
Q9WVJ3-2	PGCP	Isoform 2 of Plasma glutamate carboxypeptidase	0.597035	0.417797	2.22844	0.286362	1.34276	0.581195
Q64331	MYO6	Myosin-VI	0.597035	0.234217	4.40555	0.00148366	2.42103	0.0603787
Q8BTI8-3	SRRM2	Isoform 3 of Serine/arginine repetitive matrix protein 2	0.597035	0.73176	4.13048	0.0628682	2.65461	0.102864
Q8VBT9	ASPC1	Tether containing UBX domain for GLUT4	0.60256	0.95967	1.57036	0.411566	1	0.390837
Q8VHK1	CSKI2	Caskin-2	0.60256	0.422425	1.5417	0.46336	0.928966	0.900971
P57776	EF1D	Elongation factor 1-delta	0.60256	0.410233	1.51356	0.415589	1.03753	0.865063
P04370	MBP	Myelin basic protein	0.60256	0.579439	3.46737	0.0403844	2.0893	0.0530125
Q8C8T8	TSR2	Pre-rRNA-processing protein TSR2 homolog	0.60256	0.331765	1.51356	0.301967	0.895365	0.923632
P11725	OTC	rnithine carbamoyltransferase, mitochondrial	0.608135	0.334388	1.72187	0.310287	1.05682	0.89827
P08071	TRFL	Lactotransferrin	0.608135	0.43157	2.33346	0.272945	1.43219	0.517728
Q99N96	RM01	39S ribosomal protein L1, mitochondrial	0.613762	0.484785	2.77971	0.25061	1.7378	0.40392
Q9CQT5	POMP	Proteasome maturation protein	0.613762	0.434337	2.18776	0.241043	1.38038	0.421545
O09044	SNP23	Synaptosomal-associated protein 23	0.613762	0.129015	2.35505	0.0951152	1.43219	0.759645
Q8K4G1-2	LTBP4	Isoform LTBP4S of Latent-transforming growth factor beta-binding protein 4	0.613762	0.412293	2.88403	0.0168687	1.92309	0.0772248
Q8BP40	PPA6	Lysophosphatidic acid phosphatase type 6	0.619441	0.443393	4.20727	0.168804	2.63027	0.243404
Q9D6P8	CALL3	Calmodulin-like protein 3	0.619441	0.439862	2.29087	0.278923	1.41906	0.524741
Q9CQW5	LEG2	Galectin-2	0.619441	0.346945	3.01995	0.448685	1.92309	0.744513
P00683	RNAS1	Ribonuclease pancreatic	0.619441	0.437759	6.08135	0.13412	3.80189	0.179177
Q9WV92-3	E41L3	Isoform 4.1B-kidney of Band 4.1-like protein 3	0.619441	0.306053	2.88403	0.00564675	1.72187	0.0193421
Q63871	RPAB4	DNA-directed RNA polymerases I, II, and III subunit RPABC4	0.625173	0.451102	1.58489	0.423841	1	0.932455
A2A7S8-2	K1522	Isoform 2 of Uncharacterized protein KIAA1522	0.625173	0.0125014	2.80543	7.90825e-05	1.77011	0.0860814
Q9D958	SPCS1	Signal peptidase complex subunit 1	0.630957	0.451763	1.78649	0.370919	1.13763	0.783813
Q9D7F7	CHM4C	Charged multivesicular body protein 4c	0.636796	0.759988	1.78649	0.917446	1.10662	0.834764
Q31125	S39A7	Zinc transporter SLC39A7	0.636796	0.45937	1.59956	0.434533	1.02802	0.940582
Q9D281	NXP20	Protein Noxp20	0.642688	0.421601	5.34564	0.062107	3.40408	0.106074
Q3TKT4	SMCA4	Transcription activator BRG1	0.642688	0.934901	7.51623	0.0454219	4.48745	0.0471968
P63044	VAMP2	Vesicle-associated membrane protein 2	0.642688	0.465736	1.64437	0.416527	1.0666	0.880509
Q497H0	ZFAN3	AN1-type zinc finger protein 3	0.642688	0.451905	2.22844	0.276905	1.44544	0.503705
Q9DCW4	ETFB	REVERSED Electron transfer flavoprotein subunit beta	0.648634	0.474847	2.96483	0.218209	1.94089	0.335261
Q8CAQ8-3	IMMT	REVERSED Isoform 3 of Mitochondrial inner membrane protein	0.648634	0.474809	1.85353	0.356423	1.21339	0.698223
Q8R086	SUOX	Sulfite oxidase, mitochondrial	0.648634	0.81612	3.53183	0.203941	2.29087	0.251638
Q922M7	ASHWN	Ashwin	0.648634	0.476851	1.95885	0.332532	1.28233	0.627906
Q9CZ42-3	CARKD	Isoform 3 of Carbohydrate kinase domain-containing protein	0.654636	0.481494	1.99526	0.322955	1.31826	0.59473
Q61189	ICLN	Methylosome subunit pICln	0.654636	0.787198	4.87529	0.285708	3.59749	0.333776
Q99K41	EMIL1	EMILIN-1	0.654636	0.289342	2.29087	0.156044	1.64437	0.406375
Q7TNG5	EMAL2	Echinoderm microtubule-associated protein-like 2	0.654636	0.482539	4.28548	0.166497	2.83139	0.227388
O88643	PAK1	Serine/threonine-protein kinase PAK 1	0.654636	0.221138	2.37684	0.123267	1.51356	0.465911
Q5SUR0	PUR4	Phosphoribosylformylglycinamidine synthase	0.654636	0.626166	1.69044	0.110449	1.1272	0.397447
Q8K1L5	PP1RB	Protein phosphatase 1 regulatory subunit 11	0.654636	0.981997	2.85759	0.596746	1.92309	0.608603
Q9D5V6	SYAP1	Synapse-associated protein 1	0.654636	0.089321	1.85353	0.211102	1.20226	0.864572
Q80YX1-5	TENA	Isoform 5 of Tenascin	0.654636	0.242568	2.31206	0.194057	1.47231	0.44863
Q9DAS9	GBG12	Guanine nucleotide-binding protein G(I)/G(S)/G(	0.660694	0.471593	2.48886	0.131772	1.8197	0.251863
Q9D9Z5	DDA1	DET1- and DDB1-associated protein 1	0.660694	0.359388	3.46737	0.172168	2.33346	0.291646
Q78JE5	FBX22	F-box only protein 22	0.660694	0.492234	3.28095	0.201202	2.18776	0.290981
Q9D1L9	HBXIP	Hepatitis B virus X-interacting protein homolog	0.660694	0.755438	4.16869	0.331128	2.83139	0.407745
Q91WE1	SNX15	Sorting nexin-15	0.660694	0.803905	1.8197	0.352872	1.23595	0.41807
Q9DB42	ZN593	Zinc finger protein 593	0.660694	0.669075	2.12814	0.375576	1.41906	0.526042
Q80YN3	BCAS1	Breast carcinoma-amplified sequence 1 homolog	0.666807	0.210514	2.22844	0.00418262	1.49969	0.115428
P00375	DYR	Dihydrofolate reductase	0.666807	0.299101	1.8197	0.192931	1.2942	0.434925
P24815	3BHS1	3 beta-hydroxysteroid dehydrogenase/Delta 5-->4-isomerase type 1	0.666807	0.495465	1.59956	0.435939	1.07647	0.868064
Q62193	RFA2	Replication protein A 32 kDa subunit	0.666807	0.497827	2.99226	0.216395	2.01372	0.319719
Q9JLV1	BAG3	BAG family molecular chaperone regulator 3	0.666807	0.421584	2.31206	0.0178959	1.57036	0.0554419
Q64356	SVS6	Seminal vesicle secretory protein 6	0.666807	0.310888	5.10505	0.00189757	3.56451	0.00847851

## Sheet: Table S4 clinical scores
Clinical scores from 6th to 9th
6th day	Body Weight Loss	Fecal Blood	Stool Consistency	DAI
HY8	-1.5±1.0	0.0±0.0	0.0±0.0	0.0±0.0
CON	-1.8±0.6	0.0±0.0	0.0±0.0	0.0±0.0
DSS	5.3±1.2	3.8±0.1	2.8±0.3	2.7±0.2
DHY8	3.8±0.8	3.7±0.1	2.5±0.3	2.5±0.1
7th day	Body Weight Loss	Fecal Blood	Stool Consistency	DAI
HY8	-1.2±0.7	0.0±0.0	0.0±0.0	0.0±0.0
CON	-2.2±0.7	0.0±0.0	0.0±0.0	0.0±0.0
DSS	10.0±1.6	3.7±0.1	3.6±0.1	3.2±0.1
DHY8	7.2±0.6	3.5±0.1	3.0±0.2	2.8±0.1
8th day	Body Weight Loss	Fecal Blood	Stool Consistency	DAI
HY8	-1.5±0.9	0.0±0.0	0.0±0.0	0.0±0.0
CON	-2.0±0.7	0.0±0.0	0.0±0.0	0.0±0.0
DSS	11.6±2.4	3.7±0.0	3.8±0.1	3.4±0.1
DHY8	7.9±0.6	3.3±0.1	3.0±0.3	2.8±0.1
9th day	Body Weight Loss	Fecal Blood	Stool Consistency	DAI
HY8	-2.3±1.3	0.0±0.0	0.0±0.0	0.0±0.0
CON	-3.2±1.0	0.0±0.0	0.0±0.0	0.0±0.0
DSS	13.1±2.8	3.7±0.1	3.7±0.1	3.5±0.2
DHY8	7.8±0.7	3.3±0.1	2.4±0.8	2.6±0.1
